# Supplementary material for: Occurrence of microplastics in freshwater gastropods from a tropical river U-Taphao, southern Thailand
Source: PeerJ. 2023 Feb 8;11:e14861. doi: 10.7717/peerj.14861 (PMC9921971; doi:10.7717/peerj.14861)
Supplement: Supplemental Information 1 [file peerj-11-14861-s001.xlsx]

## Sheet: all-KT
No.	Length (mm)	width (mm)	weigth (g) (shell + tissue)
50	12.93	9.45	0.44
62	13.3	9.04	0.41		***KT = Filopaludina sumatrensis speciosa Upstream
68	14.45	9.18	0.48		KP = Filopaludina sumatrensis speciosa Downstream
51	15.01	10.5	0.78		CT = Pomacea canaliculata Upstream
67	15.6	10.51	0.69		CP = Pomacea canaliculata Downstream
65	16.55	11.89	0.71
66	16.68	11.38	0.86
57	17.27	12.14	1.19
63	17.51	11.66	0.92
55	18.03	13.08	1.12
44	18.45	13.36	1.46
49	18.6	12.86	1.2
56	18.67	12.79	1.03
48	18.78	12.86	1.55
60	18.93	12.81	1.04
58	18.94	12.63	1.19
47	19.13	12.98	1.4
54	19.14	14.05	1.42
35	19.23	13.16	1.35
43	19.79	12.79	1.38
45	19.92	13.44	1.63
53	19.95	13.3	1.75
37	20.16	14.03	1.72
61	20.85	13.95	1.63
64	20.98	14.02	1.32
38	21.05	14.23	1.49
46	21.07	14.4	1.85
34	21.71	14.5	1.82
39	21.71	14.85	1.87
52	21.84	13.85	1.56
41	21.9	14.46	2.03
59	22.29	17.69	1.75
28	22.35	15.36	2.49
32	22.6	15.98	1.75
33	22.75	15.5	2.44
23	23.17	16.97	3.13
36	23.37	15.31	1.94
40	23.77	15.12	1.96
30	23.8	17.19	3.17
42	23.85	14.78	2.31
25	23.96	17.15	3.25
27	24.55	18.04	3.08
26	24.57	16.67	2.88
31	24.57	16.88	3.07
24	24.72	17.37	3.73
18	24.79	15.82	2.66
29	24.97	15.69	2.5
16	24.99	17.35	2.63
19	25.27	18.97	3.95
22	25.99	17.54	4.11
20	27.12	17.02	3.66
10	27.17	19.11	4.81
14	27.67	18.26	4.72
11	27.73	18.94	4.55
21	27.99	18.63	4.17
17	28.21	20.33	4.91
15	28.37	19.17	4.64
12	28.53	19.38	4.1
13	28.96	19.35	4.87
2	29.05	22.81	4.02
8	30.15	21.08	5.38
5	30.29	20.96	5.59
9	30.33	22.31	7.04
3	30.72	21.86	6.19
7	31.49	22.39	6.76
6	31.8	21.18	5.56
4	32.17	22.66	6.56
1	32.28	21.72	7.05
Sum	1564.49	1076.69	186.67
Average	23.0072	15.8337	2.74515

## Sheet: all-KP
No.	Length (mm)	width (mm)	weigth (g) (shell + tissue)
89	23.3	19.06	2.4		***KT = Filopaludina sumatrensis speciosa Upstream
47	23.35	16.78	2.97		KP = Filopaludina sumatrensis speciosa Downstream
100	23.57	17.71	2.31		CT = Pomacea canaliculata Upstream
134	23.57	20.73	2.06		CP = Pomacea canaliculata Downstream
30	23.85	17.59	2.95
120	24.03	17.56	2.34
3	24.08	16.87	0.9
83	24.08	18.57	2.07
111	24.36	18.89	2
40	24.42	17.01	2.25
43	24.52	19.59	2.63
150	24.55	16.49	2
72	24.75	18.43	2.25
54	24.77	16.15	2.22
88	24.78	18.74	2.65
65	24.98	18.81	2.54
79	25	17.45	2.18
66	25.05	17.21	2.09
123	25.16	17.55	2.48
116	25.23	18.19	2.69
21	25.28	17.03	2.6
115	25.41	18.06	2.63
34	25.51	19.91	3.24
126	25.52	19.16	2.31
98	25.6	18.43	2.66
78	25.69	18.99	2.05
32	25.72	16.25	3.06
17	25.88	18.27	2.8
5	25.89	16.9	2.8
74	25.92	18.09	2.45
107	25.94	16.74	2.6
68	25.97	17.32	2.4
23	26.01	16.83	2.6
145	26.04	19.9	2.74
39	26.16	17.61	2.82
139	26.18	19.25	2.59
7	26.23	16.22	2.9
73	26.28	17.06	2.96
15	26.3	18.67	2.9
16	26.3	20.17	2.7
53	26.35	19.61	3.31
84	26.38	20.16	3.08
64	26.42	17.47	2.96
143	26.46	23.12	3.24
144	26.48	18.67	2.71
76	26.57	18.76	2.56
119	26.57	19.7	2.82
20	26.6	17.31	2.3
37	26.73	16.7	2.88
56	26.76	19.75	3.27
99	26.84	21.34	3.18
31	26.89	20.14	3.68
93	26.9	18.18	3.09
87	26.96	18.51	2.5
92	26.99	20.01	3.13
75	27.02	19.17	2.83
27	27.03	16.51	3
82	27.05	19.95	2.85
125	27.09	20.16	3.72
71	27.1	17.64	3.06
148	27.11	18.87	3.38
48	27.12	18.48	3.7
38	27.18	17.32	2.89
49	27.21	17.43	2.93
110	27.36	19.53	2.84
141	27.41	19.85	3.05
103	27.43	17.71	3.49
67	27.45	17.93	3.23
130	27.48	19.72	3.08
146	27.49	18.96	2.88
52	27.51	19.34	3.94
95	27.51	21.17	4.59
19	27.52	19.11	3.6
44	27.53	17.5	2.84
50	27.58	19.51	3.09
12	27.61	17.52	3.4
51	27.64	18.23	2.89
96	27.7	19.3	3.18
131	27.7	18.42	3.14
57	27.8	17.84	2.79
81	27.8	19.31	3.22
132	27.87	22.27	3.45
8	27.89	16.91	3
136	27.89	21.76	2.95
36	27.98	17.06	3
63	28.03	19.85	3.09
6	28.05	18.02	3.3
11	28.06	21.02	3.5
128	28.1	20.9	2.69
101	28.12	17.16	2.67
114	28.13	19.05	3.14
13	28.15	20.21	3
24	28.24	17.9	3.4
10	28.27	18.87	3.5
133	28.31	20.23	4.06
77	28.32	19.02	3.38
112	28.33	17.42	3.15
122	28.35	20.1	3.92
85	28.39	21.23	3.59
118	28.43	18.59	3.45
55	28.44	18.33	4.06
121	28.53	20.54	3.86
91	28.67	20.82	3.46
60	28.76	18.91	3.74
102	28.89	19.21	3.45
113	28.89	20.1	2.74
90	28.92	21.25	3.27
9	28.94	20.56	3.3
138	28.98	21.98	3.1
26	29.03	18.1	3.06
2	29.11	20.15	3.3
94	29.22	21.92	3.39
58	29.3	20.43	3.25
135	29.46	20.56	3.83
35	29.51	17.9	3.76
1	29.52	19.79	3.7
105	29.57	22.57	3.43
86	29.58	21.18	4.67
4	29.61	21.89	3.6
29	29.89	18.13	3.39
28	30.1	18.3	5.15
59	30.15	18.58	2.77
45	30.19	20.32	3.84
140	30.21	21.68	4.35
106	30.27	19.49	3.77
109	30.27	19.78	4.68
124	30.38	21.62	2.73
18	30.51	21.98	4.1
14	30.57	21.2	3.9
46	30.62	20.09	4.74
149	30.68	23.23	3.75
147	30.76	22.65	4.04
117	30.84	20.66	4
62	30.9	19.64	5.15
33	30.96	19.36	4
137	31.14	19.36	3.49
127	31.21	19.78	4.04
42	31.76	19.62	4.42
70	32.06	21.81	4.78
97	32.06	23.75	4.65
25	32.39	20.79	4.5
41	32.47	19.69	5.24
69	32.62	20.11	5.49
129	33.07	20.6	5.56
61	33.17	23.17	6.32
142	33.2	22.97	5.24
22	33.36	20.8	5.5
108	36.54	24.04	7
104	36.57	23.19	6.81
80	38	25.79	8.14
Sum	4192.32	2902.09	502.86
Average	27.98	18.0379	2.37583

## Sheet: all-CT
No.	Length (mm)	width (mm)	weigth (g) (shell + tissue)
132	7.87	5.75	0.05			***KT = Filopaludina sumatrensis speciosa Upstream
131	7.98	5.47	0.09			KP = Filopaludina sumatrensis speciosa Downstream
146	8.4	6.22	0.14			CT = Pomacea canaliculata Upstream
145	8.64	6.24	0.13			CP = Pomacea canaliculata Downstream
117	8.71	0.34	0.12
143	8.87	6.42	0.17
139	8.95	6.96	0.13
137	9.23	6.78	0.19
142	9.29	6.51	0.16
119	9.31	6.68	0.17
140	9.33	6.6	0.15
129	9.41	6.48	0.16
130	9.6	6.76	0.17
141	9.62	6.77	0.16
138	9.65	6.42	0.2
122	9.7	6.79	0.13
133	9.74	6.65	0.18
147	9.77	6.33	0.17
128	9.83	7.1	0.18
115	9.88	6.97	0.19
124	9.91	6.99	0.21
144	9.91	7.27	0.22
134	10.03	7.22	0.18
136	10.04	6.61	0.2
135	10.05	6.87	0.15
126	10.23	7.31	0.23
118	10.37	7.46	0.19
112	10.7	7.67	0.23
125	10.73	7.86	0.24
116	10.9	7.58	0.26
109	10.95	7.84	0.29
120	11.01	7.81	0.23
111	11.02	7.55	0.29
121	11.04	7.65	0.23
114	11.06	7.72	0.25
127	11.33	7.59	0.28
113	11.45	8.18	0.29
110	11.63	7.93	0.3
105	11.86	8.03	0.39
123	11.9	8.02	0.33
102	11.91	8.18	0.37
108	12.53	8.74	0.37
95	12.82	9.53	0.41
107	13.01	9.26	0.51
103	13.93	9.83	0.5
101	14.02	9.25	0.5
104	14.04	9.3	0.52
94	14.07	10.36	0.48
100	14.3	9.79	0.46
106	14.32	10.06	0.66
96	14.99	10.32	0.6
149	15.36	10.55	0.6
99	16.07	13.1	0.88
97	16.1	10.96	0.68
92	18.12	12.65	1.21
93	18.76	13.49	1.09
85	18.94	13.34	1.26
83	19	15.62	1.49
90	19.05	13.32	1.35
86	19.4	13.53	1.32
82	19.63	14	1.48
81	20.01	13.52	1.3
84	20.33	14.99	1.7
87	20.34	14.56	1.66
98	20.49	13.94	1.59
91	20.59	14.4	1.45
89	20.65	15.25	1.82
79	20.83	14.33	1.92
78	21.33	16.12	1.66
148	21.43	15.62	2
88	21.59	15.49	1.77
76	22.54	15.85	2.35
80	22.55	16.65	2.11
72	23.24	17.98	2.76
75	24.13	17.61	2.53
71	24.39	18.58	3.8
74	24.48	18.1	2.61
69	24.78	18.13	2.63
77	25.63	18.5	3.47
70	26.68	19.15	3.9
65	27.32	19.92	4.12
50	27.81	20.49	3.74
73	28.01	20.04	3.88
68	28.86	20.63	4.24
59	30.07	22.94	4.91
64	30.08	23.04	5.85
66	30.11	22.75	5.31
63	30.4	23.16	4.67
54	30.41	23.37	5.69
56	30.97	23.35	6.25
37	31.47	24.22	4.94
67	31.56	23.26	5.25
32	31.71	22.47	5.94
15	31.82	22.49	6.16
14	32.08	23.23	5.72
58	32.52	23.89	6.67
17	32.9	24.68	7.53
10	33.08	23.63	5.84
39	33.14	25.24	6.45
61	33.2	26.63	7.71
20	33.36	24.74	7.87
49	33.59	26.54	6
52	33.94	23.97	6.88
43	34.11	25.08	6.73
53	34.12	25.66	7.96
26	34.16	25.45	7.56
9	34.29	28	6.49
60	34.41	26.62	8.86
51	35.37	26.59	5.96
29	35.44	27.99	6.22
34	36.16	26.41	8.24
40	36.32	28.57	8.21
47	36.38	28.45	6.96
28	36.44	28.32	7.03
30	36.59	27.15	8.83
62	36.72	28.88	11.21
27	36.8	28.21	7.93
19	36.89	24.577	7.59
45	37.3	29.4	7.84
41	37.33	28.2	8.51
21	37.4	27.99	10.18
35	37.51	27.44	9.42
8	37.64	27.68	8.85
24	37.91	31.11	8.8
3	38.06	30.21	12.15
55	38.07	28.42	9.14
1	38.09	28.14	7.85
31	38.18	29.7	11.32
42	38.43	30.07	11.53
2	38.81	32.44	7.04
57	38.84	31.18	11.53
25	39.09	29.64	11.28
4	39.29	29.21	11.72
6	39.3	28.83	12.59
12	39.38	31.38	7.31
46	39.53	30.13	11.57
36	39.89	28.58	10.31
5	39.9	30.03	10.22
23	40.17	29.14	10.1
16	40.4	29.89	11.17
33	40.74	29.29	14.59
38	40.74	28.96	11
48	40.75	31.36	11.93
7	41.07	35.14	11.23
11	41.44	36.99	10.28
22	41.64	31.92	13.79
13	42.38	30.94	15.93
44	42.43	33.29	14.61
18	42.77	30.71	10.85
Sum	3633.37	2697.4	649.84
Average	24.385	18.1033	4.36134

## Sheet: all-CP
No.	Length (mm)	width (mm)	weigth (g) (shell + tissue)
52	29.06	21.69	6
18	31.73	23.81	5.5
46	32.26	22.92	6		***KT = Filopaludina sumatrensis speciosa Upstream
43	34.22	24.21	8.7		KP = Filopaludina sumatrensis speciosa Downstream
3	34.46	25.39	7.6		CT = Pomacea canaliculata Upstream
39	35.35	26.49	8.2		CP = Pomacea canaliculata Downstream
48	35.57	27.5	7.7
41	35.76	25.51	7.5
15	36.13	27.24	10
38	36.15	27.08	7.1
47	36.59	27.35	9
50	37.46	26.23	10.8
51	37.68	27.01	9
26	37.8	28.78	15
44	38.41	25.83	7.4
17	38.48	25.87	8.5
4	38.58	28.14	12.5
49	38.84	27.86	12.3
35	39.36	28.51	14.2
45	39.58	28.23	8.5
23	40	27.96	9.5
11	41.15	28.5	10.2
31	41.18	32.4	15.4
25	41.34	34.01	11
24	41.48	29.21	11.3
12	41.91	32.14	11.8
27	43.13	33.11	16
21	43.4	30.04	16.3
14	44.01	33.12	16.4
7	44.3	29.51	12.9
28	44.47	31.66	14.7
40	44.8	34.75	14.8
37	45.47	33.71	13.7
9	45.83	32.4	16.1
29	45.89	31.57	15
13	46.06	32.99	16.2
42	46.21	33.35	14.3
36	46.35	33.22	14.9
34	46.41	34	18.8
5	46.71	35.46	26.1
33	46.78	33.28	20.4
16	47.3	33.79	19.6
10	48.22	34.61	19.6
19	48.84	35.77	14.4
1	49.12	31.46	17.9
8	49.44	33.87	16.3
6	49.64	33.36	18.9
32	49.79	37.1	17.1
2	49.81	37.37	25.6
22	50	37.96	19.5
30	51.39	36.86	23.5
20	54.45	38.69	24.5
SUM	2198.35	1592.88	714.2
AVERAGE	42.276	30.6323	13.7346

## Sheet: analysis-KT
No.	Length (mm)	width (mm)	weigth (g) (shell + tissue)	tissue (g)	MPs (particles)
47	19.13	12.98	1.4	0.58	4		***KT = Filopaludina sumatrensis speciosa Upstream
45	19.92	13.44	1.63	0.89	3		KP = Filopaludina sumatrensis speciosa Downstream
61	20.85	13.95	1.63	0.78	12		CT = Pomacea canaliculata Upstream
34	21.71	14.5	1.82	1.17	3		CP = Pomacea canaliculata Downstream
41	21.9	14.46	2.03	0.82	8
59	22.29	17.69	1.75	0.44	1
32	22.6	15.98	1.75	0.8	2
23	23.17	16.97	3.13	1.56	7
36	23.37	15.31	1.94	0.7	5
30	23.8	17.19	3.17	1.59	2
27	24.55	18.04	3.08	1.51	8
26	24.57	16.67	2.88	1.27	7
31	24.57	16.88	3.07	1.27	2
16	24.99	17.35	2.63	0.89	2
19	25.27	18.97	3.95	1.87	2
20	27.12	17.02	3.66	1.76	8
14	27.67	18.26	4.72	2.31	3
11	27.73	18.94	4.55	1.68	5
21	27.99	18.63	4.17	1.84	7
17	28.21	20.33	4.91	2.45	1
15	28.37	19.17	4.64	2.4	4
12	28.53	19.38	4.1	2.19	5
13	28.96	19.35	4.87	1.95	4
8	30.15	21.08	5.38	1.38	8
3	30.72	21.86	6.19	2.85	6
Sum	609.01	421.42	81.65	36.37	119
Average	25.1256	17.376	3.322	1.478	4.76

## Sheet: analysis-KP
No.	Length (mm)	width (mm)	weigth (g) (shell + tissue)	tissue (g)	MPs (particles)
3	24.08	16.87	0.9	0.91	4
21	25.28	17.03	2.6	1.44	11		***KT = Filopaludina sumatrensis speciosa Upstream
17	25.88	18.27	2.8	1.23	5		KP = Filopaludina sumatrensis speciosa Downstream
5	25.89	16.9	2.8	1.56	9		CT = Pomacea canaliculata Upstream
23	26.01	16.83	2.6	1.23	5		CP = Pomacea canaliculata Downstream
7	26.23	16.22	2.9	1.28	5
15	26.3	18.67	2.9	1.47	6
16	26.3	20.17	2.7	1.7	7
20	26.6	17.31	2.3	1.11	5
12	27.61	17.52	3.4	2.11	7
8	27.89	16.91	3	1.7	8
6	28.05	18.02	3.3	1.88	6
11	28.06	21.02	3.5	2	10
13	28.15	20.21	3	1.97	2
24	28.24	17.9	3.4	2.14	2
10	28.27	18.87	3.5	2	3
9	28.94	20.56	3.3	1.89	2
26	29.03	18.1	3.06	1.66	3
2	29.11	20.15	3.3	1.88	1
1	29.52	19.79	3.7	2	5
4	29.61	21.89	3.6	1.92	5
18	30.51	21.98	4.1	1.7	5
14	30.57	21.2	3.9	1.75	3
25	32.39	20.79	4.5	3.13	7
22	33.36	20.8	5.5	3.16	4
Sum	677.8	457.11	79.66	43.91	130
Average	28.0752	18.9592	3.2224	1.7928	5.2

## Sheet: analysis-CT
No.	Length (mm)	width (mm)	weigth (g) (shell + tissue)	tissue (g)	MPs (particles)
92	18.12	12.65	1.21	0.58	4
85	18.94	13.34	1.26	0.65	8		***KT = Filopaludina sumatrensis speciosa Upstream
84	20.33	14.99	1.7	0.92	4		KP = Filopaludina sumatrensis speciosa Downstream
98	20.49	13.94	1.59	0.7	4		CT = Pomacea canaliculata Upstream
88	21.59	15.49	1.77	0.81	4		CP = Pomacea canaliculata Downstream
65	27.32	19.92	4.12	1.81	2
59	30.07	22.94	4.91	2.63	14
64	30.08	23.04	5.85	2.47	8
37	31.47	24.22	4.94	2.34	3
32	31.71	22.47	5.94	2.25	5
39	33.14	25.24	6.45	2.56	6
52	33.94	23.97	6.88	3.3	4
28	36.44	28.32	7.03	2.12	7
62	36.72	28.88	11.21	5.04	4
27	36.8	28.21	7.93	3.28	9
8	37.64	27.68	8.85	3.61	7
2	38.81	32.44	7.04	2.74	6
57	38.84	31.18	11.53	4.78	6
36	39.89	28.58	10.31	5.93	6
5	39.9	30.03	10.22	4.58	7
16	40.4	29.89	11.17	4.46	15
48	40.75	31.36	11.93	3.12	7
11	41.44	36.99	10.28	5	13
13	42.38	30.94	15.93	9.17	16
44	42.43	33.29	14.61	9.06	12
Sum	811.52	617.35	183.45	83.33	181
Average	33.1856	25.2	7.3864	3.3564	7.24

## Sheet: analysis-CP
No.	Length (mm)	width (mm)	weigth (g) (shell + tissue)	tissue (g)	MPs (particles)
52	29.06	21.69	6	2.8	3		***KT = Filopaludina sumatrensis speciosa Upstream
18	31.73	23.81	5.5	2.81	4		KP = Filopaludina sumatrensis speciosa Downstream
46	32.26	22.92	6	3.52	5		CT = Pomacea canaliculata Upstream
43	34.22	24.21	8.7	6	10		CP = Pomacea canaliculata Downstream
3	34.46	25.39	7.6	4.1	2
39	35.35	26.49	8.2	5.57	3
48	35.57	27.5	7.7	5.22	9
41	35.76	25.51	7.5	4.79	1
15	36.13	27.24	10	4.56	3
38	36.15	27.08	7.1	4.31	2
47	36.59	27.35	9	4.76	2
51	37.68	27.01	9	5.43	3
26	37.8	28.78	15	9.03	4
44	38.41	25.83	7.4	4.2	3
17	38.48	25.87	8.5	4.09	2
4	38.58	28.14	12.5	5.52	5
49	38.84	27.86	12.3	7	8
35	39.36	28.51	14.2	8.86	3
45	39.58	28.23	8.5	4.67	1
11	41.15	28.5	10.2	5.52	1
24	41.48	29.21	11.3	7.34	8
21	43.4	30.04	16.3	7.24	3
7	44.3	29.51	12.9	6.66	9
28	44.47	31.66	14.7	7.29	3
36	46.35	33.22	14.9	8.72	6
Sum	918.1	659.87	245	137.21	103
Average	37.8864	27.2624	10.04	5.6004	4.12

## Sheet: MP-KT
No.	Color							Characteristics		length
	Blue	Transparent	Dark blue	Black	Pink	White	Red	fiber	fragment	< 100 μm	100 μm - 500 μm	> 500 μm - 1 mm	> 1 mm
KT16	1	1	0	0	0	0	0	1	1	1	0	1	0
KT45	0	0	1	2	0	0	0	3	0	0	1	2	0
KT30	0	0	2	0	0	0	0	2	0	1	1	0	0
KT36	0	0	3	2	0	0	0	4	1	1	0	3	1
KT19	0	0	1	1	0	0	0	1	1	1	1	0	0
KT59	0	0	0	1	0	0	0	1	0	0	1	0	0
KT31	0	0	2	0	0	0	0	2	0	1	0	0	1
KT41	0	1	1	5	0	1	0	8	0	2	3	1	2
KT27	0	0	4	4	0	0	0	8	0	2	4	1	1
KT61	0	2	5	4	1	0	0	12	0	0	3	4	5
KT14	0	1	1	1	0	0	0	3	0	0	2	1	0
KT26	0	0	4	3	0	0	0	6	1	2	2	3	0
KT13	0	0	2	1	0	0	1	3	1	1	1	1	1
KT12	0	0	4	1	0	0	0	5	0	5	0	0	0
KT20	0	2	2	3	0	1	0	8	0	1	1	0	6
KT23	0	2	5	0	0	0	0	7	0	1	0	3	3
KT34	0	2	0	0	1	0	0	3	0	0	1	1	1
KT3	0	0	3	2	0	1	0	5	1	1	1	1	3
KT32	0	1	1	0	0	0	0	2	0	0	0	2	0
KT8	0	6	1	0	0	0	1	8	0	1	0	3	4
KT15	0	0	2	2	0	0	0	4	0	0	2	2	0
KT17	0	0	1	0	0	0	0	1	0	0	0	0	1
KT47	0	1	1	2	0	0	0	4	0	1	2	0	1
KT21	0	1	1	5	0	0	0	7	0	1	1	2	3
KT11	1	1	1	2	0	0	0	4	1	0	2	1	2
		***KT = Filopaludina sumatrensis speciosa Upstream
		KP = Filopaludina sumatrensis speciosa Downstream
		CT = Pomacea canaliculata Upstream
		CP = Pomacea canaliculata Downstream

## Sheet: MP-KP
No.	Color										Characteristics			length
	Blue	Transparent	Dark blue	Black	Pink	White	Red	ม่วง	เขียว	น้ำตาล	fiber	fragment	other	< 100 μm	100 μm - 500 μm	> 500 μm - 1 mm	> 1 mm
KP1	1	3	1	0	0	0	0	0	0	0	4	1	0	1	0	0	4
KP2	0	0	0	0	1	0	0	0	0	0	1	0	0	0	0	0	1
KP3	2	1	1	0	0	0	0	0	0	0	2	2	0	2	0	1	1
KP4	0	3	0	0	0	0	0	0	0	2	5	0	0	0	0	2	3
KP5	0	4	4	0	1	0	0	0	0	0	9	0	0	1	1	4	3
KP6	0	5	1	0	0	0	0	0	0	0	6	0	0	0	1	3	2
KP7	0	1	3	1	0	0	0	0	0	0	5	0	0	0	0	1	4
KP8	0	1	7	0	0	0	0	0	0	0	8	0	0	0	2	1	5
KP9	0	0	1	0	0	0	0	0	1	0	1	1	0	0	0	1	1
KP10	0	2	1	0	0	0	0	0	0	0	3	0	0	0	1	1	1
KP11	0	0	9	1	0	0	0	0	0	0	9	0	1	1	3	5	2
KP12	0	1	3	2	0	0	0	0	0	1	6	1	0	0	3	1	3
KP13	0	0	2	0	0	0	0	0	0	0	2	0	0	0	2	0	0
KP14	0	0	3	0	0	0	0	0	0	0	3	0	0	0	0	1	2
KP15	0	1	4	1	0	0	0	0	0	0	6	0	0	0	4	1	1
KP16	0	1	3	2	0	0	1	0	0	0	6	1	0	1	0	3	3
KP17	0	0	3	1	0	1	0	0	0	0	5	0	0	0	2	1	2
KP18	0	0	4	1	0	0	0	0	0	0	3	2	0	2	1	1	1
KP20	0	2	1	2	0	0	0	0	0	0	5	0	0	0	2	3	0
KP21	0	8	1	1	0	1	0	0	0	0	11	0	0	0	1	8	2
KP22	0	3	1	0	0	0	0	0	0	0	4	0	0	0	4	0	0
KP23	0	0	3	2	0	0	0	0	0	0	0	5	0	0	3	1	1
KP24	0	0	2	0	0	0	0	0	0	0	2	0	0	0	0	1	1
KP25	0	1	2	2	0	0	1	1	0	0	6	1	0	0	5	2	0
KP26	0	0	1	2	0	0	0	0	0	0	3	0	0	0	2	0	1
	***KT = Filopaludina sumatrensis speciosa Upstream
	KP = Filopaludina sumatrensis speciosa Downstream
	CT = Pomacea canaliculata Upstream
	CP = Pomacea canaliculata Downstream

[truncated: 2 more sheets: MP-CT, MP-CP]
