# Supplementary material for: Occurrence of microplastics in freshwater gastropods from a tropical river U-Taphao, southern Thailand
Source: PeerJ. 2023 Feb 8;11:e14861. doi: 10.7717/peerj.14861 (PMC9921971; doi:10.7717/peerj.14861)
Supplement: Supplemental Information 2 [file peerj-11-14861-s002.xlsx]

## Sheet: Polyamine
Created as New Dataset	Sample 001 By Administrator Date Monday	June 27 2022
cm-1	%T
4000	101.39
3999	101.38
3998	101.39
3997	101.4
3996	101.42
3995	101.43
3994	101.44
3993	101.45
3992	101.47
3991	101.48
3990	101.47
3989	101.46
3988	101.45
3987	101.44
3986	101.42
3985	101.4
3984	101.4
3983	101.4
3982	101.41
3981	101.41
3980	101.4
3979	101.4
3978	101.41
3977	101.42
3976	101.45
3975	101.49
3974	101.52
3973	101.54
3972	101.54
3971	101.54
3970	101.54
3969	101.52
3968	101.5
3967	101.47
3966	101.44
3965	101.43
3964	101.44
3963	101.47
3962	101.51
3961	101.54
3960	101.57
3959	101.58
3958	101.58
3957	101.56
3956	101.54
3955	101.53
3954	101.53
3953	101.54
3952	101.57
3951	101.63
3950	101.72
3949	101.79
3948	101.83
3947	101.84
3946	101.88
3945	101.94
3944	101.97
3943	101.93
3942	101.86
3941	101.81
3940	101.79
3939	101.74
3938	101.64
3937	101.55
3936	101.53
3935	101.6
3934	101.7
3933	101.8
3932	101.9
3931	101.99
3930	102.03
3929	102.01
3928	101.99
3927	101.98
3926	101.97
3925	101.94
3924	101.94
3923	102
3922	102.08
3921	102.1
3920	102.08
3919	102.08
3918	102.11
3917	102.1
3916	102.04
3915	101.95
3914	101.88
3913	101.79
3912	101.66
3911	101.53
3910	101.47
3909	101.5
3908	101.65
3907	101.88
3906	102.1
3905	102.27
3904	102.44
3903	102.7
3902	103.04
3901	103.3
3900	103.28
3899	102.98
3898	102.62
3897	102.37
3896	102.23
3895	102.2
3894	102.23
3893	102.3
3892	102.26
3891	102.09
3890	101.97
3889	102.11
3888	102.4
3887	102.45
3886	102.16
3885	101.91
3884	102.08
3883	102.6
3882	103.05
3881	103.06
3880	102.71
3879	102.34
3878	102.26
3877	102.39
3876	102.45
3875	102.27
3874	102.09
3873	102.23
3872	102.66
3871	102.94
3870	102.78
3869	102.49
3868	102.53
3867	102.84
3866	102.99
3865	102.85
3864	102.71
3863	102.72
3862	102.71
3861	102.57
3860	102.37
3859	102.26
3858	102.32
3857	102.51
3856	102.64
3855	102.4
3854	101.97
3853	101.88
3852	102.13
3851	102.52
3850	102.79
3849	102.76
3848	102.54
3847	102.33
3846	102.19
3845	102.12
3844	102.09
3843	102.12
3842	102.27
3841	102.55
3840	102.81
3839	102.93
3838	102.91
3837	102.86
3836	102.89
3835	102.98
3834	103.05
3833	102.96
3832	102.68
3831	102.37
3830	102.22
3829	102.26
3828	102.33
3827	102.26
3826	102.12
3825	102.18
3824	102.51
3823	102.8
3822	102.76
3821	102.52
3820	102.45
3819	102.76
3818	103.14
3817	103.08
3816	102.53
3815	102.01
3814	101.93
3813	102.08
3812	102.09
3811	101.94
3810	101.85
3809	101.88
3808	101.83
3807	101.61
3806	101.51
3805	101.82
3804	102.39
3803	102.73
3802	102.57
3801	102.25
3800	102.27
3799	102.66
3798	103.02
3797	102.97
3796	102.61
3795	102.26
3794	102.08
3793	101.98
3792	101.84
3791	101.67
3790	101.55
3789	101.49
3788	101.5
3787	101.57
3786	101.68
3785	101.76
3784	101.8
3783	101.89
3782	102.02
3781	102.12
3780	102.09
3779	102
3778	101.94
3777	101.94
3776	101.91
3775	101.78
3774	101.65
3773	101.68
3772	101.83
3771	101.92
3770	101.92
3769	101.98
3768	102.19
3767	102.42
3766	102.43
3765	102.22
3764	102.04
3763	102.07
3762	102.19
3761	102.21
3760	102.17
3759	102.23
3758	102.36
3757	102.42
3756	102.45
3755	102.47
3754	102.39
3753	102.15
3752	102.05
3751	102.33
3750	102.65
3749	102.83
3748	103.16
3747	103.74
3746	104.06
3745	103.52
3744	102.55
3743	102.11
3742	102.35
3741	102.73
3740	102.83
3739	102.76
3738	102.73
3737	102.81
3736	103.08
3735	103.53
3734	103.91
3733	103.85
3732	103.33
3731	102.73
3730	102.4
3729	102.37
3728	102.38
3727	102.28
3726	102.22
3725	102.36
3724	102.6
3723	102.74
3722	102.69
3721	102.56
3720	102.44
3719	102.32
3718	102.14
3717	101.96
3716	101.87
3715	101.89
3714	101.88
3713	101.83
3712	101.96
3711	102.29
3710	102.54
3709	102.53
3708	102.29
3707	101.97
3706	101.72
3705	101.6
3704	101.56
3703	101.51
3702	101.4
3701	101.25
3700	101.14
3699	101.09
3698	101.05
3697	100.92
3696	100.81
3695	100.84
3694	100.98
3693	101.12
3692	101.24
3691	101.45
3690	101.76
3689	101.94
3688	101.87
3687	101.76
3686	101.77
3685	101.81
3684	101.71
3683	101.54
3682	101.44
3681	101.42
3680	101.45
3679	101.62
3678	102
3677	102.4
3676	102.55
3675	102.47
3674	102.47
3673	102.75
3672	103.04
3671	102.97
3670	102.66
3669	102.41
3668	102.28
3667	102.17
3666	101.97
3665	101.7
3664	101.43
3663	101.24
3662	101.12
3661	101.05
3660	101.09
3659	101.25
3658	101.42
3657	101.43
3656	101.32
3655	101.33
3654	101.62
3653	102
3652	102.13
3651	102.01
3650	102.23
3649	102.95
3648	103.5
3647	103.46
3646	103.05
3645	102.6
3644	102.23
3643	101.9
3642	101.6
3641	101.4
3640	101.29
3639	101.22
3638	101.16
3637	101.15
3636	101.2
3635	101.23
3634	101.23
3633	101.33
3632	101.64
3631	101.99
3630	102.09
3629	102
3628	101.9
3627	101.88
3626	101.91
3625	101.83
3624	101.62
3623	101.46
3622	101.48
3621	101.6
3620	101.74
3619	101.86
3618	101.96
3617	102.1
3616	102.27
3615	102.41
3614	102.41
3613	102.3
3612	102.2
3611	102.16
3610	102.12
3609	102.06
3608	101.99
3607	101.92
3606	101.82
3605	101.69
3604	101.52
3603	101.36
3602	101.27
3601	101.28
3600	101.35
3599	101.47
3598	101.6
3597	101.71
3596	101.78
3595	101.81
3594	101.78
3593	101.71
3592	101.68
3591	101.71
3590	101.78
3589	101.86
3588	102
3587	102.15
3586	102.18
3585	102.08
3584	101.9
3583	101.68
3582	101.49
3581	101.35
3580	101.28
3579	101.25
3578	101.24
3577	101.23
3576	101.22
3575	101.22
3574	101.19
3573	101.16
3572	101.17
3571	101.24
3570	101.39
3569	101.58
3568	101.87
3567	102.24
3566	102.5
3565	102.51
3564	102.34
3563	102.07
3562	101.8
3561	101.58
3560	101.43
3559	101.32
3558	101.22
3557	101.13
3556	101.07
3555	101.06
3554	101.1
3553	101.16
3552	101.21
3551	101.23
3550	101.24
3549	101.25
3548	101.26
3547	101.31
3546	101.4
3545	101.49
3544	101.52
3543	101.45
3542	101.32
3541	101.16
3540	101.03
3539	100.95
3538	100.93
3537	100.95
3536	100.98
3535	100.99
3534	100.98
3533	100.94
3532	100.91
3531	100.91
3530	100.96
3529	101.04
3528	101.12
3527	101.18
3526	101.22
3525	101.26
3524	101.27
3523	101.26
3522	101.21
3521	101.14
3520	101.06
3519	100.97
3518	100.89
3517	100.82
3516	100.78
3515	100.75
3514	100.73
3513	100.74
3512	100.8
3511	100.88
3510	100.95
3509	100.97
3508	100.95
3507	100.91
3506	100.87
3505	100.86
3504	100.9
3503	100.97
3502	101.03
3501	101.02
3500	100.96
3499	100.86
3498	100.78
3497	100.73
3496	100.72
3495	100.72
3494	100.72
3493	100.71
3492	100.69
3491	100.67
3490	100.67
3489	100.68
3488	100.69
3487	100.7
3486	100.7
3485	100.7
3484	100.71
3483	100.72
3482	100.73
3481	100.75
3480	100.75
3479	100.74
3478	100.71
3477	100.67
3476	100.65
3475	100.64
3474	100.64
3473	100.62
3472	100.58
3471	100.54
3470	100.51
3469	100.5
3468	100.52
3467	100.55
3466	100.57
3465	100.59
3464	100.6
3463	100.61
3462	100.61
3461	100.61
3460	100.62
3459	100.62
3458	100.62
3457	100.61
3456	100.59
3455	100.57
3454	100.56
3453	100.54
3452	100.53
3451	100.52
3450	100.54
3449	100.58
3448	100.64
3447	100.69
3446	100.73
3445	100.75
3444	100.74
3443	100.7
3442	100.65
3441	100.6
3440	100.56
3439	100.51
3438	100.47
3437	100.43
3436	100.41
3435	100.41
3434	100.42
3433	100.43
3432	100.43
3431	100.44
3430	100.45
3429	100.46
3428	100.48
3427	100.48
3426	100.49
3425	100.49
3424	100.5
3423	100.52
3422	100.56
3421	100.59
3420	100.61
3419	100.61
3418	100.59
3417	100.55
3416	100.49
3415	100.45
3414	100.43
3413	100.42
3412	100.42
3411	100.42
3410	100.41
3409	100.41
3408	100.42
3407	100.43
3406	100.43
3405	100.42
3404	100.4
3403	100.38
3402	100.36
3401	100.37
3400	100.38
3399	100.41
3398	100.43
3397	100.43
3396	100.43
3395	100.43
3394	100.43
3393	100.43
3392	100.44
3391	100.44
3390	100.45
3389	100.44
3388	100.44
3387	100.44
3386	100.45
3385	100.47
3384	100.48
3383	100.47
3382	100.45
3381	100.43
3380	100.41
3379	100.4
3378	100.4
3377	100.39
3376	100.39
3375	100.38
3374	100.37
3373	100.36
3372	100.33
3371	100.31
3370	100.3
3369	100.31
3368	100.33
3367	100.36
3366	100.39
3365	100.41
3364	100.42
3363	100.42
3362	100.41
3361	100.41
3360	100.41
3359	100.42
3358	100.43
3357	100.43
3356	100.43
3355	100.41
3354	100.38
3353	100.35
3352	100.32
3351	100.3
3350	100.31
3349	100.33
3348	100.35
3347	100.36
3346	100.35
3345	100.34
3344	100.32
3343	100.32
3342	100.31
3341	100.3
3340	100.3
3339	100.3
3338	100.33
3337	100.36
3336	100.38
3335	100.4
3334	100.4
3333	100.39
3332	100.38
3331	100.36
3330	100.34
3329	100.32
3328	100.31
3327	100.29
3326	100.3
3325	100.31
3324	100.33
3323	100.34
3322	100.35
3321	100.36
3320	100.36
3319	100.35
3318	100.34
3317	100.32
3316	100.31
3315	100.3
3314	100.29
3313	100.28
3312	100.27
3311	100.26
3310	100.25
3309	100.24
3308	100.24
3307	100.24
3306	100.24
3305	100.25
3304	100.26
3303	100.27
3302	100.28
3301	100.28
3300	100.27
3299	100.26
3298	100.25
3297	100.24
3296	100.23
3295	100.23
3294	100.23
3293	100.24
3292	100.26
3291	100.28
3290	100.31
3289	100.33
3288	100.33
3287	100.32
3286	100.32
3285	100.32
3284	100.32
3283	100.32
3282	100.32
3281	100.32
3280	100.32
3279	100.31
3278	100.31
3277	100.3
3276	100.29
3275	100.29
3274	100.29
3273	100.28
3272	100.27
3271	100.26
3270	100.27
3269	100.28
3268	100.29
3267	100.3
3266	100.31
3265	100.32
3264	100.32
3263	100.33
3262	100.33
3261	100.34
3260	100.34
3259	100.33
3258	100.33
3257	100.32
3256	100.32
3255	100.34
3254	100.37
3253	100.38
3252	100.39
3251	100.37
3250	100.33
3249	100.3
3248	100.27
3247	100.27
3246	100.3
3245	100.33
3244	100.36
3243	100.38
3242	100.39
3241	100.38
3240	100.37
3239	100.35
3238	100.34
3237	100.33
3236	100.31
3235	100.3
3234	100.3
3233	100.32
3232	100.34
3231	100.37
3230	100.4
3229	100.41
3228	100.42
3227	100.43
3226	100.43
3225	100.42
3224	100.42
3223	100.41
3222	100.41
3221	100.41
3220	100.43
3219	100.44
3218	100.44
3217	100.44
3216	100.43
3215	100.43
3214	100.45
3213	100.47
3212	100.49
3211	100.5
3210	100.5
3209	100.5
3208	100.48
3207	100.47
3206	100.46
3205	100.46
3204	100.45
3203	100.45
3202	100.46
3201	100.47
3200	100.48
3199	100.49
3198	100.51
3197	100.52
3196	100.53
3195	100.53
3194	100.52
3193	100.51
3192	100.49
3191	100.49
3190	100.49
3189	100.5
3188	100.52
3187	100.53
3186	100.55
3185	100.55
3184	100.56
3183	100.56
3182	100.55
3181	100.55
3180	100.56
3179	100.57
3178	100.59
3177	100.61
3176	100.62
3175	100.62
3174	100.61
3173	100.6
3172	100.59
3171	100.58
3170	100.59
3169	100.59
3168	100.6
3167	100.61
3166	100.61
3165	100.61
3164	100.62
3163	100.61
3162	100.61
3161	100.61
3160	100.6
3159	100.6
3158	100.6
3157	100.58
3156	100.57
3155	100.55
3154	100.54
3153	100.54
3152	100.56
3151	100.59
3150	100.61
3149	100.64
3148	100.65
3147	100.66
3146	100.66
3145	100.67
3144	100.66
3143	100.65
3142	100.63
3141	100.61
3140	100.61
3139	100.62
3138	100.64
3137	100.66
3136	100.68
3135	100.7
3134	100.71
3133	100.71
3132	100.71
3131	100.69
3130	100.69
3129	100.69
3128	100.7
3127	100.71
3126	100.72
3125	100.72
3124	100.71
3123	100.7
3122	100.69
3121	100.68
3120	100.67
3119	100.66
3118	100.66
3117	100.67
3116	100.68
3115	100.7
3114	100.72
3113	100.72
3112	100.72
3111	100.7
3110	100.7
3109	100.7
3108	100.72
3107	100.73
3106	100.74
3105	100.74
3104	100.73
3103	100.73
3102	100.73
3101	100.74
3100	100.75
3099	100.77
3098	100.78
3097	100.79
3096	100.8
3095	100.8
3094	100.79
3093	100.76
3092	100.73
3091	100.7
3090	100.69
3089	100.68
3088	100.68
3087	100.68
3086	100.67
3085	100.67
3084	100.67
3083	100.67
3082	100.69
3081	100.7
3080	100.72
3079	100.73
3078	100.74
3077	100.75
3076	100.75
3075	100.75
3074	100.74
3073	100.73
3072	100.72
3071	100.7
3070	100.69
3069	100.68
3068	100.68
3067	100.71
3066	100.74
3065	100.77
3064	100.8
3063	100.81
3062	100.81
3061	100.81
3060	100.79
3059	100.78
3058	100.77
3057	100.78
3056	100.79
3055	100.8
3054	100.8
3053	100.78
3052	100.77
3051	100.77
3050	100.78
3049	100.79
3048	100.8
3047	100.79
3046	100.77
3045	100.75
3044	100.74
3043	100.74
3042	100.76
3041	100.78
3040	100.8
3039	100.82
3038	100.82
3037	100.8
3036	100.79
3035	100.79
3034	100.8
3033	100.83
3032	100.87
3031	100.9
3030	100.91
3029	100.91
3028	100.89
3027	100.87
3026	100.85
3025	100.85
3024	100.85
3023	100.86
3022	100.86
3021	100.85
3020	100.84
3019	100.84
3018	100.84
3017	100.85
3016	100.86
3015	100.87
3014	100.88
3013	100.9
3012	100.92
3011	100.94
3010	100.95
3009	100.96
3008	100.95
3007	100.95
3006	100.94
3005	100.93
3004	100.93
3003	100.93
3002	100.92
3001	100.91
3000	100.89
2999	100.87
2998	100.85
2997	100.84
2996	100.84
2995	100.84
2994	100.84
2993	100.84
2992	100.85
2991	100.85
2990	100.86
2989	100.86
2988	100.86
2987	100.86
2986	100.84
2985	100.82
2984	100.8
2983	100.78
2982	100.77
2981	100.76
2980	100.75
2979	100.75
2978	100.75
2977	100.74
2976	100.73
2975	100.72
2974	100.72
2973	100.73
2972	100.73
2971	100.74
2970	100.73
2969	100.72
2968	100.7
2967	100.69
2966	100.67
2965	100.66
2964	100.64
2963	100.63
2962	100.62
2961	100.62
2960	100.62
2959	100.61
2958	100.6
2957	100.58
2956	100.55
2955	100.52
2954	100.48
2953	100.44
2952	100.42
2951	100.41
2950	100.38
2949	100.34
2948	100.29
2947	100.22
2946	100.16
2945	100.09
2944	100.02
2943	99.96
2942	99.88
2941	99.8
2940	99.7
2939	99.58
2938	99.47
2937	99.34
2936	99.21
2935	99.06
2934	98.9
2933	98.72
2932	98.51
2931	98.31
2930	98.09
2929	97.88
2928	97.67
2927	97.43
2926	97.18
2925	96.9
2924	96.61
2923	96.31
2922	96
2921	95.69
2920	95.4
2919	95.13
2918	94.92
2917	94.78
2916	94.74
2915	94.79
2914	94.93
2913	95.14
2912	95.41
2911	95.68
2910	95.96
2909	96.21
2908	96.44
2907	96.64
2906	96.82
2905	96.98
2904	97.11
2903	97.24
2902	97.36
2901	97.46
2900	97.56
2899	97.64
2898	97.72
2897	97.8
2896	97.88
2895	97.97
2894	98.06
2893	98.16
2892	98.25
2891	98.33
2890	98.42
2889	98.5
2888	98.58
2887	98.66
2886	98.75
2885	98.83
2884	98.92
2883	99
2882	99.09
2881	99.17
2880	99.26
2879	99.34
2878	99.42
2877	99.49
2876	99.55
2875	99.6
2874	99.65
2873	99.7
2872	99.74
2871	99.78
2870	99.81
2869	99.82
2868	99.82
2867	99.8
2866	99.77
2865	99.72
2864	99.65
2863	99.56
2862	99.45
2861	99.3
2860	99.13
2859	98.91
2858	98.64
2857	98.32
2856	97.93
2855	97.5
2854	97.03
2853	96.56
2852	96.12
2851	95.75
2850	95.52
2849	95.45
2848	95.55
2847	95.78
2846	96.12
2845	96.5
2844	96.9
2843	97.29
2842	97.64
2841	97.96
2840	98.24
2839	98.49
2838	98.72
2837	98.92
2836	99.09
2835	99.25
2834	99.38
2833	99.49
2832	99.6
2831	99.69
2830	99.78
2829	99.86
2828	99.92
2827	99.97
2826	100.02
2825	100.06
2824	100.1
2823	100.15
2822	100.19
2821	100.22
2820	100.26
2819	100.29
2818	100.32
2817	100.36
2816	100.38
2815	100.4
2814	100.42
2813	100.44
2812	100.45
2811	100.46
2810	100.47
2809	100.49
2808	100.51
2807	100.54
2806	100.56
2805	100.58
2804	100.59
2803	100.6
2802	100.61
2801	100.61
2800	100.61
2799	100.61
2798	100.63
2797	100.64
2796	100.66
2795	100.68
2794	100.69
2793	100.7
2792	100.71
2791	100.73
2790	100.74
2789	100.76
2788	100.78
2787	100.8
2786	100.82
2785	100.83
2784	100.84
2783	100.85
2782	100.86
2781	100.87
2780	100.88
2779	100.88
2778	100.87
2777	100.87
2776	100.87
2775	100.88
2774	100.9
2773	100.92
2772	100.93
2771	100.95
2770	100.95
2769	100.96
2768	100.97
2767	100.97
2766	100.97
2765	100.97
2764	100.97
2763	100.98
2762	100.98
2761	100.99
2760	100.99
2759	101
2758	101
2757	101.01
2756	101.01
2755	101.02
2754	101.02
2753	101.02
2752	101.02
2751	101.02
2750	101.01
2749	101.01
2748	101.01
2747	101.02
2746	101.03
2745	101.03
2744	101.03
2743	101.03
2742	101.03
2741	101.04
2740	101.04
2739	101.05
2738	101.05
2737	101.06
2736	101.06
2735	101.07
2734	101.07
2733	101.07
2732	101.07
2731	101.07
2730	101.08
2729	101.08
2728	101.07
2727	101.07
2726	101.07
2725	101.07
2724	101.09
2723	101.1
2722	101.11
2721	101.12
2720	101.12
2719	101.12
2718	101.12
2717	101.12
2716	101.13
2715	101.13
2714	101.13
2713	101.13
2712	101.13
2711	101.13
2710	101.13
2709	101.14
2708	101.15
2707	101.15
2706	101.16
2705	101.17
2704	101.18
2703	101.18
2702	101.18
2701	101.18
2700	101.17
2699	101.17
2698	101.17
2697	101.17
2696	101.17
2695	101.17
2694	101.18
2693	101.18
2692	101.19
2691	101.19
2690	101.19
2689	101.19
2688	101.19
2687	101.19
2686	101.19
2685	101.19
2684	101.19
2683	101.19
2682	101.19
2681	101.19
2680	101.19
2679	101.19
2678	101.18
2677	101.18
2676	101.17
2675	101.17
2674	101.17
2673	101.17
2672	101.17
2671	101.17
2670	101.17
2669	101.16
2668	101.15
2667	101.14
2666	101.13
2665	101.12
2664	101.1
2663	101.08
2662	101.06
2661	101.04
2660	101.02
2659	101.01
2658	101.01
2657	101
2656	101
2655	101
2654	101
2653	101
2652	101
2651	101
2650	100.99
2649	100.99
2648	100.98
2647	100.98
2646	100.98
2645	100.99
2644	100.99
2643	101
2642	101
2641	100.99
2640	100.99
2639	101
2638	101
2637	101.01
2636	101.01
2635	101.02
2634	101.03
2633	101.03
2632	101.04
2631	101.04
2630	101.04
2629	101.04
2628	101.05
2627	101.07
2626	101.08
2625	101.1
2624	101.1
2623	101.11
2622	101.11
2621	101.12
2620	101.13
2619	101.13
2618	101.13
2617	101.12
2616	101.13
2615	101.14
2614	101.15
2613	101.17
2612	101.18
2611	101.18
2610	101.18
2609	101.17
2608	101.17
2607	101.18
2606	101.19
2605	101.2
2604	101.21
2603	101.22
2602	101.23
2601	101.24
2600	101.24
2599	101.24
2598	101.23
2597	101.23
2596	101.22
2595	101.23
2594	101.24
2593	101.26
2592	101.27
2591	101.27
2590	101.26
2589	101.26
2588	101.26
2587	101.27
2586	101.28
2585	101.3
2584	101.31
2583	101.32
2582	101.32
2581	101.32
2580	101.32
2579	101.31
2578	101.31
2577	101.32
2576	101.32
2575	101.33
2574	101.33
2573	101.34
2572	101.34
2571	101.35
2570	101.36
2569	101.37
2568	101.38
2567	101.38
2566	101.38
2565	101.38
2564	101.38
2563	101.38
2562	101.38
2561	101.38
2560	101.38
2559	101.38
2558	101.39
2557	101.4
2556	101.4
2555	101.41
2554	101.41
2553	101.4
2552	101.4
2551	101.4
2550	101.39
2549	101.39
2548	101.39
2547	101.4
2546	101.41
2545	101.42
2544	101.43
2543	101.44
2542	101.45
2541	101.45
2540	101.45
2539	101.45
2538	101.44
2537	101.44
2536	101.44
2535	101.44
2534	101.45
2533	101.45
2532	101.45
2531	101.45
2530	101.45
2529	101.45
2528	101.45
2527	101.45
2526	101.45
2525	101.45
2524	101.44
2523	101.44
2522	101.44
2521	101.44
2520	101.45
2519	101.47
2518	101.49
2517	101.5
2516	101.51
2515	101.51
2514	101.51
2513	101.51
2512	101.5
2511	101.49
2510	101.49
2509	101.49
2508	101.49
2507	101.49
2506	101.5
2505	101.52
2504	101.52
2503	101.52
2502	101.52
2501	101.51
2500	101.5
2499	101.49
2498	101.49
2497	101.48
2496	101.48
2495	101.49
2494	101.49
2493	101.49
2492	101.48
2491	101.48
2490	101.47
2489	101.48
2488	101.48
2487	101.49
2486	101.51
2485	101.52
2484	101.53
2483	101.54
2482	101.55
2481	101.55
2480	101.55
2479	101.55
2478	101.55
2477	101.54
2476	101.52
2475	101.52
2474	101.51
2473	101.51
2472	101.51
2471	101.51
2470	101.51
2469	101.51
2468	101.51
2467	101.53
2466	101.54
2465	101.54
2464	101.54
2463	101.52
2462	101.5
2461	101.49
2460	101.48
2459	101.48
2458	101.48
2457	101.47
2456	101.47
2455	101.46
2454	101.47
2453	101.48
2452	101.49
2451	101.49
2450	101.5
2449	101.5
2448	101.49
2447	101.48
2446	101.48
2445	101.48
2444	101.47
2443	101.47
2442	101.48
2441	101.49
2440	101.5
2439	101.52
2438	101.53
2437	101.53
2436	101.54
2435	101.54
2434	101.54
2433	101.55
2432	101.55
2431	101.56
2430	101.56
2429	101.56
2428	101.56
2427	101.57
2426	101.57
2425	101.58
2424	101.59
2423	101.58
2422	101.58
2421	101.57
2420	101.57
2419	101.57
2418	101.56
2417	101.56
2416	101.56
2415	101.56
2414	101.57
2413	101.58
2412	101.58
2411	101.58
2410	101.58
2409	101.58
2408	101.59
2407	101.6
2406	101.6
2405	101.61
2404	101.61
2403	101.61
2402	101.62
2401	101.63
2400	101.63
2399	101.64
2398	101.64
2397	101.63
2396	101.63
2395	101.63
2394	101.63
2393	101.63
2392	101.63
2391	101.62
2390	101.6
2389	101.58
2388	101.56
2387	101.53
2386	101.49
2385	101.45
2384	101.41
2383	101.39
2382	101.39
2381	101.41
2380	101.44
2379	101.49
2378	101.55
2377	101.62
2376	101.69
2375	101.74
2374	101.74
2373	101.71
2372	101.68
2371	101.64
2370	101.6
2369	101.57
2368	101.56
2367	101.56
2366	101.56
2365	101.57
2364	101.6
2363	101.63
2362	101.68
2361	101.75
2360	101.87
2359	102.05
2358	102.22
2357	102.36
2356	102.45
2355	102.41
2354	102.21
2353	101.94
2352	101.77
2351	101.75
2350	101.77
2349	101.65
2348	101.3
2347	100.89
2346	100.73
2345	100.89
2344	101.19
2343	101.46
2342	101.65
2341	101.77
2340	101.86
2339	101.91
2338	101.95
2337	101.99
2336	102.04
2335	102.1
2334	102.12
2333	102.11
2332	102.09
2331	102.1
2330	102.13
2329	102.14
2328	102.11
2327	102.01
2326	101.85
2325	101.7
2324	101.62
2323	101.65
2322	101.73
2321	101.83
2320	101.88
2319	101.89
2318	101.87
2317	101.82
2316	101.75
2315	101.67
2314	101.62
2313	101.57
2312	101.54
2311	101.51
2310	101.49
2309	101.47
2308	101.44
2307	101.41
2306	101.38
2305	101.34
2304	101.3
2303	101.27
2302	101.25
2301	101.23
2300	101.21
2299	101.19
2298	101.18
2297	101.15
2296	101.13
2295	101.1
2294	101.08
2293	101.07
2292	101.05
2291	101.03
2290	101
2289	100.98
2288	100.97
2287	100.96
2286	100.95
2285	100.95
2284	100.95
2283	100.95
2282	100.96
2281	100.96
2280	100.97
2279	100.99
2278	101.01
2277	101.02
2276	101.04
2275	101.06
2274	101.09
2273	101.12
2272	101.13
2271	101.12
2270	101.1
2269	101.1
2268	101.11
2267	101.14
2266	101.18
2265	101.21
2264	101.21
2263	101.19
2262	101.17
2261	101.15
2260	101.14
2259	101.14
2258	101.15
2257	101.17
2256	101.2
2255	101.22
2254	101.25
2253	101.27
2252	101.28
2251	101.28
2250	101.27
2249	101.26
2248	101.23
2247	101.22
2246	101.21
2245	101.21
2244	101.21
2243	101.21
2242	101.21
2241	101.22
2240	101.25
2239	101.27
2238	101.3
2237	101.31
2236	101.3
2235	101.28
2234	101.27
2233	101.26
2232	101.23
2231	101.2
2230	101.17
2229	101.17
2228	101.19
2227	101.24
2226	101.3
2225	101.34
2224	101.34
2223	101.29
2222	101.23
2221	101.18
2220	101.17
2219	101.18
2218	101.2
2217	101.22
2216	101.22
2215	101.23
2214	101.23
2213	101.23
2212	101.24
2211	101.23
2210	101.21
2209	101.2
2208	101.18
2207	101.18
2206	101.18
2205	101.19
2204	101.18
2203	101.18
2202	101.2
2201	101.24
2200	101.27
2199	101.27
2198	101.25
2197	101.23
2196	101.2
2195	101.17
2194	101.13
2193	101.08
2192	101.04
2191	101.02
2190	101.02
2189	101.01
2188	100.98
2187	100.95
2186	100.95
2185	100.99
2184	101.06
2183	101.14
2182	101.22
2181	101.27
2180	101.26
2179	101.22
2178	101.19
2177	101.22
2176	101.29
2175	101.35
2174	101.36
2173	101.3
2172	101.2
2171	101.09
2170	100.99
2169	100.91
2168	100.84
2167	100.8
2166	100.78
2165	100.74
2164	100.64
2163	100.51
2162	100.46
2161	100.62
2160	101.04
2159	101.59
2158	102.09
2157	102.37
2156	102.41
2155	102.3
2154	102.14
2153	101.99
2152	101.87
2151	101.81
2150	101.83
2149	101.88
2148	101.92
2147	101.94
2146	101.95
2145	101.97
2144	101.97
2143	101.94
2142	101.89
2141	101.85
2140	101.82
2139	101.84
2138	101.91
2137	102.01
2136	102.08
2135	102.13
2134	102.14
2133	102.12
2132	102.07
2131	102.01
2130	101.97
2129	101.94
2128	101.92
2127	101.88
2126	101.83
2125	101.77
2124	101.71
2123	101.64
2122	101.58
2121	101.56
2120	101.54
2119	101.52
2118	101.5
2117	101.46
2116	101.42
2115	101.38
2114	101.36
2113	101.36
2112	101.34
2111	101.31
2110	101.3
2109	101.3
2108	101.31
2107	101.33
2106	101.35
2105	101.35
2104	101.33
2103	101.31
2102	101.3
2101	101.31
2100	101.32
2099	101.33
2098	101.36
2097	101.42
2096	101.49
2095	101.53
2094	101.52
2093	101.48
2092	101.43
2091	101.38
2090	101.36
2089	101.37
2088	101.37
2087	101.37
2086	101.36
2085	101.34
2084	101.3
2083	101.25
2082	101.22
2081	101.21
2080	101.2
2079	101.19
2078	101.17
2077	101.16
2076	101.14
2075	101.12
2074	101.12
2073	101.12
2072	101.13
2071	101.14
2070	101.15
2069	101.17
2068	101.17
2067	101.17
2066	101.17
2065	101.17
2064	101.15
2063	101.14
2062	101.16
2061	101.19
2060	101.21
2059	101.19
2058	101.16
2057	101.13
2056	101.12
2055	101.1
2054	101.05
2053	100.92
2052	100.76
2051	100.64
2050	100.65
2049	100.78
2048	100.91
2047	100.97
2046	100.99
2045	101
2044	100.98
2043	100.94
2042	100.89
2041	100.87
2040	100.84
2039	100.79
2038	100.73
2037	100.7
2036	100.71
2035	100.77
2034	100.85
2033	100.95
2032	101.01
2031	101.05
2030	101.11
2029	101.2
2028	101.27
2027	101.29
2026	101.29
2025	101.28
2024	101.25
2023	101.21
2022	101.18
2021	101.17
2020	101.15
2019	101.14
2018	101.18
2017	101.26
2016	101.34
2015	101.38
2014	101.41
2013	101.43
2012	101.41
2011	101.35
2010	101.31
2009	101.32
2008	101.4
2007	101.51
2006	101.62
2005	101.69
2004	101.69
2003	101.62
[truncated: 1,603 more rows]

## Sheet: PP
Created as New Dataset	Sample 004 By Administrator Date Monday	June 27 2022
cm-1	%T
4000	101.63
3999	101.62
3998	101.63
3997	101.64
3996	101.65
3995	101.66
3994	101.67
3993	101.68
3992	101.71
3991	101.72
3990	101.71
3989	101.7
3988	101.68
3987	101.67
3986	101.65
3985	101.64
3984	101.64
3983	101.65
3982	101.66
3981	101.66
3980	101.66
3979	101.66
3978	101.66
3977	101.68
3976	101.7
3975	101.72
3974	101.75
3973	101.76
3972	101.77
3971	101.78
3970	101.77
3969	101.75
3968	101.73
3967	101.7
3966	101.68
3965	101.67
3964	101.68
3963	101.71
3962	101.73
3961	101.76
3960	101.78
3959	101.8
3958	101.8
3957	101.78
3956	101.76
3955	101.74
3954	101.74
3953	101.75
3952	101.78
3951	101.84
3950	101.92
3949	101.99
3948	102.02
3947	102.02
3946	102.06
3945	102.12
3944	102.16
3943	102.14
3942	102.07
3941	102.02
3940	102
3939	101.95
3938	101.86
3937	101.76
3936	101.74
3935	101.8
3934	101.9
3933	101.99
3932	102.07
3931	102.15
3930	102.18
3929	102.16
3928	102.13
3927	102.13
3926	102.12
3925	102.09
3924	102.09
3923	102.14
3922	102.23
3921	102.26
3920	102.25
3919	102.26
3918	102.3
3917	102.29
3916	102.22
3915	102.14
3914	102.08
3913	102
3912	101.88
3911	101.75
3910	101.68
3909	101.7
3908	101.82
3907	102.02
3906	102.22
3905	102.38
3904	102.53
3903	102.77
3902	103.09
3901	103.34
3900	103.33
3899	103.06
3898	102.71
3897	102.46
3896	102.33
3895	102.31
3894	102.35
3893	102.43
3892	102.41
3891	102.23
3890	102.08
3889	102.2
3888	102.48
3887	102.56
3886	102.29
3885	102.02
3884	102.15
3883	102.65
3882	103.1
3881	103.16
3880	102.83
3879	102.46
3878	102.35
3877	102.47
3876	102.53
3875	102.36
3874	102.15
3873	102.24
3872	102.64
3871	102.93
3870	102.8
3869	102.51
3868	102.52
3867	102.81
3866	102.98
3865	102.87
3864	102.74
3863	102.76
3862	102.77
3861	102.65
3860	102.45
3859	102.32
3858	102.32
3857	102.44
3856	102.52
3855	102.28
3854	101.87
3853	101.76
3852	101.99
3851	102.41
3850	102.74
3849	102.78
3848	102.62
3847	102.42
3846	102.28
3845	102.21
3844	102.16
3843	102.16
3842	102.26
3841	102.48
3840	102.7
3839	102.8
3838	102.78
3837	102.74
3836	102.79
3835	102.91
3834	103.02
3833	102.97
3832	102.74
3831	102.45
3830	102.3
3829	102.34
3828	102.41
3827	102.35
3826	102.19
3825	102.21
3824	102.5
3823	102.77
3822	102.74
3821	102.49
3820	102.38
3819	102.64
3818	103.02
3817	103.02
3816	102.54
3815	102.07
3814	102
3813	102.17
3812	102.21
3811	102.06
3810	101.96
3809	101.98
3808	101.93
3807	101.69
3806	101.54
3805	101.78
3804	102.3
3803	102.64
3802	102.51
3801	102.2
3800	102.21
3799	102.61
3798	103.01
3797	103.02
3796	102.71
3795	102.38
3794	102.22
3793	102.14
3792	102.02
3791	101.87
3790	101.75
3789	101.69
3788	101.68
3787	101.74
3786	101.83
3785	101.9
3784	101.94
3783	102.01
3782	102.14
3781	102.24
3780	102.23
3779	102.14
3778	102.09
3777	102.1
3776	102.08
3775	101.96
3774	101.82
3773	101.83
3772	101.96
3771	102.05
3770	102.04
3769	102.08
3768	102.26
3767	102.48
3766	102.51
3765	102.32
3764	102.14
3763	102.16
3762	102.28
3761	102.3
3760	102.25
3759	102.3
3758	102.4
3757	102.45
3756	102.46
3755	102.44
3754	102.33
3753	102.07
3752	101.95
3751	102.19
3750	102.49
3749	102.65
3748	102.94
3747	103.51
3746	103.88
3745	103.43
3744	102.52
3743	102.09
3742	102.34
3741	102.74
3740	102.86
3739	102.8
3738	102.75
3737	102.82
3736	103.07
3735	103.51
3734	103.88
3733	103.86
3732	103.39
3731	102.82
3730	102.51
3729	102.49
3728	102.53
3727	102.44
3726	102.36
3725	102.47
3724	102.71
3723	102.86
3722	102.84
3721	102.73
3720	102.63
3719	102.53
3718	102.38
3717	102.21
3716	102.14
3715	102.15
3714	102.14
3713	102.09
3712	102.22
3711	102.56
3710	102.85
3709	102.9
3708	102.74
3707	102.49
3706	102.3
3705	102.23
3704	102.24
3703	102.26
3702	102.22
3701	102.14
3700	102.07
3699	102.06
3698	102.06
3697	101.96
3696	101.85
3695	101.84
3694	101.92
3693	101.99
3692	102.03
3691	102.16
3690	102.42
3689	102.58
3688	102.5
3687	102.38
3686	102.4
3685	102.44
3684	102.34
3683	102.16
3682	102.02
3681	101.96
3680	101.93
3679	102.02
3678	102.33
3677	102.71
3676	102.88
3675	102.8
3674	102.77
3673	103.02
3672	103.32
3671	103.32
3670	103.07
3669	102.87
3668	102.79
3667	102.74
3666	102.59
3665	102.36
3664	102.12
3663	101.94
3662	101.83
3661	101.76
3660	101.79
3659	101.94
3658	102.11
3657	102.14
3656	102.03
3655	102
3654	102.24
3653	102.59
3652	102.69
3651	102.56
3650	102.74
3649	103.43
3648	103.99
3647	103.98
3646	103.63
3645	103.24
3644	102.92
3643	102.63
3642	102.36
3641	102.16
3640	102.06
3639	102
3638	101.95
3637	101.94
3636	101.99
3635	102.03
3634	102.01
3633	102.08
3632	102.35
3631	102.68
3630	102.82
3629	102.77
3628	102.68
3627	102.68
3626	102.74
3625	102.69
3624	102.52
3623	102.38
3622	102.39
3621	102.52
3620	102.64
3619	102.72
3618	102.77
3617	102.86
3616	103.02
3615	103.15
3614	103.17
3613	103.08
3612	102.98
3611	102.93
3610	102.9
3609	102.84
3608	102.77
3607	102.7
3606	102.6
3605	102.47
3604	102.31
3603	102.15
3602	102.07
3601	102.06
3600	102.13
3599	102.24
3598	102.36
3597	102.46
3596	102.53
3595	102.56
3594	102.53
3593	102.46
3592	102.43
3591	102.46
3590	102.53
3589	102.62
3588	102.76
3587	102.9
3586	102.93
3585	102.85
3584	102.69
3583	102.51
3582	102.33
3581	102.19
3580	102.11
3579	102.08
3578	102.07
3577	102.06
3576	102.06
3575	102.06
3574	102.04
3573	102.02
3572	102.02
3571	102.09
3570	102.21
3569	102.39
3568	102.66
3567	103
3566	103.25
3565	103.28
3564	103.13
3563	102.91
3562	102.67
3561	102.47
3560	102.34
3559	102.24
3558	102.16
3557	102.08
3556	102.02
3555	102.01
3554	102.04
3553	102.1
3552	102.14
3551	102.15
3550	102.17
3549	102.2
3548	102.24
3547	102.29
3546	102.38
3545	102.47
3544	102.5
3543	102.44
3542	102.33
3541	102.19
3540	102.07
3539	102
3538	101.98
3537	102
3536	102.02
3535	102.04
3534	102.03
3533	102
3532	101.98
3531	101.98
3530	102.02
3529	102.1
3528	102.18
3527	102.24
3526	102.29
3525	102.33
3524	102.35
3523	102.35
3522	102.3
3521	102.24
3520	102.17
3519	102.1
3518	102.03
3517	101.97
3516	101.93
3515	101.91
3514	101.9
3513	101.91
3512	101.96
3511	102.04
3510	102.12
3509	102.15
3508	102.14
3507	102.09
3506	102.06
3505	102.06
3504	102.11
3503	102.19
3502	102.26
3501	102.26
3500	102.2
3499	102.11
3498	102.03
3497	101.99
3496	101.98
3495	102
3494	102.01
3493	102
3492	101.98
3491	101.96
3490	101.96
3489	101.97
3488	101.98
3487	102
3486	102
3485	102.01
3484	102.02
3483	102.03
3482	102.06
3481	102.08
3480	102.08
3479	102.07
3478	102.05
3477	102.02
3476	102
3475	101.99
3474	102
3473	101.99
3472	101.97
3471	101.94
3470	101.92
3469	101.91
3468	101.93
3467	101.95
3466	101.98
3465	101.99
3464	102.01
3463	102.02
3462	102.03
3461	102.04
3460	102.05
3459	102.07
3458	102.07
3457	102.06
3456	102.04
3455	102.03
3454	102.01
3453	101.99
3452	101.97
3451	101.96
3450	101.97
3449	102.02
3448	102.08
3447	102.14
3446	102.19
3445	102.22
3444	102.22
3443	102.19
3442	102.15
3441	102.11
3440	102.07
3439	102.04
3438	102
3437	101.98
3436	101.96
3435	101.96
3434	101.97
3433	101.98
3432	101.99
3431	102
3430	102.02
3429	102.03
3428	102.04
3427	102.05
3426	102.05
3425	102.05
3424	102.06
3423	102.08
3422	102.12
3421	102.17
3420	102.21
3419	102.22
3418	102.21
3417	102.17
3416	102.13
3415	102.08
3414	102.05
3413	102.04
3412	102.04
3411	102.04
3410	102.04
3409	102.05
3408	102.07
3407	102.08
3406	102.09
3405	102.09
3404	102.08
3403	102.07
3402	102.05
3401	102.05
3400	102.06
3399	102.08
3398	102.1
3397	102.11
3396	102.1
3395	102.11
3394	102.11
3393	102.13
3392	102.15
3391	102.17
3390	102.18
3389	102.17
3388	102.16
3387	102.16
3386	102.17
3385	102.19
3384	102.2
3383	102.2
3382	102.2
3381	102.18
3380	102.17
3379	102.16
3378	102.16
3377	102.16
3376	102.17
3375	102.17
3374	102.17
3373	102.15
3372	102.13
3371	102.11
3370	102.1
3369	102.11
3368	102.13
3367	102.17
3366	102.2
3365	102.23
3364	102.24
3363	102.24
3362	102.24
3361	102.24
3360	102.25
3359	102.26
3358	102.27
3357	102.28
3356	102.29
3355	102.28
3354	102.25
3353	102.22
3352	102.2
3351	102.19
3350	102.21
3349	102.23
3348	102.25
3347	102.25
3346	102.24
3345	102.24
3344	102.23
3343	102.24
3342	102.24
3341	102.24
3340	102.24
3339	102.24
3338	102.27
3337	102.3
3336	102.34
3335	102.36
3334	102.37
3333	102.37
3332	102.36
3331	102.34
3330	102.33
3329	102.31
3328	102.3
3327	102.29
3326	102.3
3325	102.32
3324	102.34
3323	102.36
3322	102.38
3321	102.39
3320	102.39
3319	102.39
3318	102.38
3317	102.37
3316	102.37
3315	102.36
3314	102.36
3313	102.35
3312	102.34
3311	102.33
3310	102.32
3309	102.32
3308	102.32
3307	102.32
3306	102.32
3305	102.33
3304	102.34
3303	102.35
3302	102.36
3301	102.36
3300	102.35
3299	102.34
3298	102.33
3297	102.32
3296	102.31
3295	102.31
3294	102.32
3293	102.33
3292	102.36
3291	102.39
3290	102.42
3289	102.44
3288	102.45
3287	102.44
3286	102.44
3285	102.44
3284	102.44
3283	102.44
3282	102.44
3281	102.44
3280	102.43
3279	102.42
3278	102.41
3277	102.4
3276	102.4
3275	102.4
3274	102.4
3273	102.39
3272	102.38
3271	102.38
3270	102.38
3269	102.39
3268	102.4
3267	102.42
3266	102.42
3265	102.43
3264	102.43
3263	102.43
3262	102.43
3261	102.43
3260	102.42
3259	102.41
3258	102.4
3257	102.39
3256	102.39
3255	102.41
3254	102.43
3253	102.45
3252	102.44
3251	102.42
3250	102.38
3249	102.34
3248	102.32
3247	102.32
3246	102.34
3245	102.38
3244	102.41
3243	102.43
3242	102.43
3241	102.42
3240	102.41
3239	102.4
3238	102.38
3237	102.36
3236	102.34
3235	102.33
3234	102.32
3233	102.34
3232	102.36
3231	102.38
3230	102.4
3229	102.4
3228	102.41
3227	102.41
3226	102.4
3225	102.4
3224	102.39
3223	102.39
3222	102.39
3221	102.39
3220	102.39
3219	102.4
3218	102.4
3217	102.39
3216	102.38
3215	102.38
3214	102.38
3213	102.39
3212	102.41
3211	102.42
3210	102.42
3209	102.42
3208	102.41
3207	102.39
3206	102.37
3205	102.36
3204	102.35
3203	102.35
3202	102.36
3201	102.37
3200	102.38
3199	102.39
3198	102.4
3197	102.41
3196	102.42
3195	102.41
3194	102.39
3193	102.38
3192	102.36
3191	102.35
3190	102.35
3189	102.35
3188	102.36
3187	102.36
3186	102.37
3185	102.37
3184	102.37
3183	102.37
3182	102.36
3181	102.36
3180	102.37
3179	102.38
3178	102.39
3177	102.4
3176	102.41
3175	102.4
3174	102.38
3173	102.36
3172	102.35
3171	102.34
3170	102.34
3169	102.34
3168	102.34
3167	102.34
3166	102.33
3165	102.33
3164	102.33
3163	102.33
3162	102.33
3161	102.32
3160	102.31
3159	102.31
3158	102.29
3157	102.26
3156	102.23
3155	102.2
3154	102.19
3153	102.18
3152	102.2
3151	102.22
3150	102.25
3149	102.27
3148	102.28
3147	102.29
3146	102.29
3145	102.28
3144	102.27
3143	102.24
3142	102.22
3141	102.19
3140	102.17
3139	102.17
3138	102.19
3137	102.21
3136	102.22
3135	102.24
3134	102.25
3133	102.26
3132	102.25
3131	102.24
3130	102.23
3129	102.22
3128	102.23
3127	102.23
3126	102.23
3125	102.23
3124	102.22
3123	102.2
3122	102.19
3121	102.17
3120	102.17
3119	102.16
3118	102.16
3117	102.16
3116	102.18
3115	102.19
3114	102.21
3113	102.21
3112	102.2
3111	102.19
3110	102.18
3109	102.18
3108	102.2
3107	102.22
3106	102.23
3105	102.24
3104	102.24
3103	102.23
3102	102.23
3101	102.23
3100	102.24
3099	102.26
3098	102.27
3097	102.28
3096	102.29
3095	102.28
3094	102.27
3093	102.24
3092	102.21
3091	102.19
3090	102.17
3089	102.17
3088	102.17
3087	102.17
3086	102.17
3085	102.16
3084	102.16
3083	102.16
3082	102.16
3081	102.17
3080	102.18
3079	102.19
3078	102.2
3077	102.21
3076	102.22
3075	102.21
3074	102.2
3073	102.19
3072	102.18
3071	102.17
3070	102.16
3069	102.15
3068	102.16
3067	102.18
3066	102.21
3065	102.24
3064	102.26
3063	102.26
3062	102.25
3061	102.24
3060	102.22
3059	102.2
3058	102.19
3057	102.19
3056	102.19
3055	102.2
3054	102.19
3053	102.17
3052	102.15
3051	102.14
3050	102.14
3049	102.15
3048	102.15
3047	102.14
3046	102.12
3045	102.11
3044	102.09
3043	102.09
3042	102.1
3041	102.11
3040	102.13
3039	102.13
3038	102.12
3037	102.1
3036	102.08
3035	102.08
3034	102.08
3033	102.1
3032	102.13
3031	102.15
3030	102.16
3029	102.15
3028	102.12
3027	102.09
3026	102.07
3025	102.06
3024	102.06
3023	102.06
3022	102.05
3021	102.04
3020	102.02
3019	102.01
3018	102.01
3017	102.01
3016	102.01
3015	102.02
3014	102.03
3013	102.03
3012	102.04
3011	102.04
3010	102.05
3009	102.04
3008	102.03
3007	102.02
3006	102
3005	101.99
3004	101.98
3003	101.97
3002	101.96
3001	101.94
3000	101.91
2999	101.88
2998	101.85
2997	101.83
2996	101.82
2995	101.81
2994	101.79
2993	101.78
2992	101.78
2991	101.77
2990	101.77
2989	101.75
2988	101.74
2987	101.71
2986	101.67
2985	101.63
2984	101.59
2983	101.54
2982	101.5
2981	101.45
2980	101.41
2979	101.36
2978	101.31
2977	101.25
2976	101.18
2975	101.1
2974	101.02
2973	100.94
2972	100.85
2971	100.74
2970	100.63
2969	100.5
2968	100.38
2967	100.27
2966	100.15
2965	100.03
2964	99.93
2963	99.86
2962	99.81
2961	99.78
2960	99.75
2959	99.71
2958	99.67
2957	99.62
2956	99.56
2955	99.49
2954	99.43
2953	99.39
2952	99.38
2951	99.41
2950	99.46
2949	99.54
2948	99.63
2947	99.74
2946	99.85
2945	99.95
2944	100.04
2943	100.11
2942	100.14
2941	100.15
2940	100.12
2939	100.06
2938	99.98
2937	99.88
2936	99.75
2935	99.61
2934	99.45
2933	99.26
2932	99.05
2931	98.84
2930	98.64
2929	98.44
2928	98.24
2927	98.04
2926	97.84
2925	97.64
2924	97.43
2923	97.24
2922	97.05
2921	96.9
2920	96.78
2919	96.72
2918	96.72
2917	96.78
2916	96.88
2915	97.03
2914	97.21
2913	97.4
2912	97.58
2911	97.76
2910	97.92
2909	98.06
2908	98.19
2907	98.31
2906	98.43
2905	98.54
2904	98.64
2903	98.75
2902	98.85
2901	98.94
2900	99.03
2899	99.12
2898	99.2
2897	99.27
2896	99.34
2895	99.41
2894	99.47
2893	99.53
2892	99.58
2891	99.62
2890	99.65
2889	99.68
2888	99.7
2887	99.71
2886	99.73
2885	99.74
2884	99.76
2883	99.76
2882	99.76
2881	99.76
2880	99.76
2879	99.77
2878	99.78
2877	99.79
2876	99.8
2875	99.81
2874	99.81
2873	99.82
2872	99.82
2871	99.83
2870	99.83
2869	99.82
2868	99.83
2867	99.85
2866	99.89
2865	99.96
2864	100.03
2863	100.09
2862	100.13
2861	100.15
2860	100.13
2859	100.06
2858	99.94
2857	99.76
2856	99.54
2855	99.27
2854	99
2853	98.76
2852	98.6
2851	98.54
2850	98.58
2849	98.72
2848	98.91
2847	99.09
2846	99.24
2845	99.34
2844	99.4
2843	99.44
2842	99.46
2841	99.48
2840	99.51
2839	99.56
2838	99.65
2837	99.76
2836	99.88
2835	100.03
2834	100.17
2833	100.32
2832	100.46
2831	100.59
2830	100.69
2829	100.79
2828	100.86
2827	100.92
2826	100.98
2825	101.02
2824	101.06
2823	101.1
2822	101.13
2821	101.16
2820	101.18
2819	101.2
2818	101.23
2817	101.26
2816	101.27
2815	101.29
2814	101.3
2813	101.31
2812	101.31
2811	101.32
2810	101.33
2809	101.35
2808	101.37
2807	101.39
2806	101.41
2805	101.42
2804	101.43
2803	101.44
2802	101.44
2801	101.45
2800	101.45
2799	101.45
2798	101.45
2797	101.46
2796	101.48
2795	101.49
2794	101.49
2793	101.49
2792	101.49
2791	101.5
2790	101.51
2789	101.53
2788	101.56
2787	101.58
2786	101.59
2785	101.6
2784	101.6
2783	101.6
2782	101.61
2781	101.62
2780	101.63
2779	101.62
2778	101.62
2777	101.61
2776	101.61
2775	101.61
2774	101.62
2773	101.63
2772	101.64
2771	101.65
2770	101.66
2769	101.66
2768	101.66
2767	101.67
2766	101.67
2765	101.67
2764	101.67
2763	101.67
2762	101.67
2761	101.67
2760	101.67
2759	101.67
2758	101.67
2757	101.67
2756	101.67
2755	101.67
2754	101.67
2753	101.66
2752	101.66
2751	101.65
2750	101.65
2749	101.64
2748	101.64
2747	101.65
2746	101.66
2745	101.66
2744	101.67
2743	101.66
2742	101.66
2741	101.65
2740	101.65
2739	101.65
2738	101.65
2737	101.64
2736	101.64
2735	101.65
2734	101.65
2733	101.64
2732	101.64
2731	101.64
2730	101.63
2729	101.62
2728	101.61
2727	101.6
2726	101.6
2725	101.59
2724	101.6
2723	101.61
2722	101.62
2721	101.62
2720	101.63
2719	101.64
2718	101.64
2717	101.65
2716	101.66
2715	101.66
2714	101.67
2713	101.67
2712	101.67
2711	101.67
2710	101.67
2709	101.67
2708	101.68
2707	101.68
2706	101.69
2705	101.69
2704	101.7
2703	101.7
2702	101.7
2701	101.7
2700	101.69
2699	101.69
2698	101.69
2697	101.69
2696	101.69
2695	101.69
2694	101.69
2693	101.7
2692	101.7
2691	101.7
2690	101.69
2689	101.69
2688	101.69
2687	101.69
2686	101.69
2685	101.7
2684	101.69
2683	101.69
2682	101.69
2681	101.69
2680	101.69
2679	101.68
2678	101.68
2677	101.67
2676	101.67
2675	101.66
2674	101.66
2673	101.66
2672	101.66
2671	101.66
2670	101.66
2669	101.66
2668	101.66
2667	101.65
2666	101.64
2665	101.62
2664	101.6
2663	101.58
2662	101.56
2661	101.54
2660	101.52
2659	101.5
2658	101.49
2657	101.47
2656	101.47
2655	101.46
2654	101.46
2653	101.47
2652	101.47
2651	101.47
2650	101.46
2649	101.46
2648	101.46
2647	101.46
2646	101.46
2645	101.46
2644	101.46
2643	101.46
2642	101.46
2641	101.45
2640	101.45
2639	101.45
2638	101.45
2637	101.46
2636	101.47
2635	101.47
2634	101.47
2633	101.47
2632	101.47
2631	101.46
2630	101.46
2629	101.46
2628	101.47
2627	101.48
2626	101.49
2625	101.49
2624	101.49
2623	101.49
2622	101.49
2621	101.49
2620	101.5
2619	101.5
2618	101.5
2617	101.51
2616	101.51
2615	101.52
2614	101.52
2613	101.53
2612	101.54
2611	101.54
2610	101.54
2609	101.54
2608	101.54
2607	101.55
2606	101.56
2605	101.56
2604	101.57
2603	101.58
2602	101.58
2601	101.58
2600	101.58
2599	101.58
2598	101.58
2597	101.58
2596	101.59
2595	101.59
2594	101.6
2593	101.6
2592	101.59
2591	101.58
2590	101.57
2589	101.57
2588	101.57
2587	101.57
2586	101.58
2585	101.59
2584	101.59
2583	101.6
2582	101.6
2581	101.6
2580	101.6
2579	101.61
2578	101.62
2577	101.63
2576	101.64
2575	101.64
2574	101.65
2573	101.65
2572	101.65
2571	101.65
2570	101.65
2569	101.66
2568	101.66
2567	101.66
2566	101.66
2565	101.66
2564	101.67
2563	101.67
2562	101.67
2561	101.68
2560	101.69
2559	101.7
2558	101.71
2557	101.71
2556	101.71
2555	101.7
2554	101.69
2553	101.68
2552	101.68
2551	101.68
2550	101.69
2549	101.69
2548	101.69
2547	101.7
2546	101.7
2545	101.7
2544	101.7
2543	101.7
2542	101.71
2541	101.71
2540	101.72
2539	101.72
2538	101.72
2537	101.73
2536	101.74
2535	101.74
2534	101.75
2533	101.75
2532	101.75
2531	101.75
2530	101.75
2529	101.76
2528	101.76
2527	101.77
2526	101.76
2525	101.75
2524	101.74
2523	101.74
2522	101.73
2521	101.73
2520	101.74
2519	101.76
2518	101.77
2517	101.79
2516	101.79
2515	101.78
2514	101.78
2513	101.77
2512	101.77
2511	101.78
2510	101.78
2509	101.78
2508	101.77
2507	101.77
2506	101.78
2505	101.79
2504	101.79
2503	101.79
2502	101.78
2501	101.77
2500	101.76
2499	101.76
2498	101.76
2497	101.76
2496	101.76
2495	101.76
2494	101.76
2493	101.76
2492	101.76
2491	101.76
2490	101.76
2489	101.77
2488	101.77
2487	101.78
2486	101.79
2485	101.81
2484	101.82
2483	101.83
2482	101.83
2481	101.81
2480	101.8
2479	101.8
2478	101.8
2477	101.8
2476	101.8
2475	101.8
2474	101.79
2473	101.79
2472	101.79
2471	101.78
2470	101.78
2469	101.78
2468	101.8
2467	101.81
2466	101.81
2465	101.81
2464	101.8
2463	101.79
2462	101.77
2461	101.76
2460	101.75
2459	101.75
2458	101.74
2457	101.73
2456	101.72
2455	101.72
2454	101.72
2453	101.72
2452	101.72
2451	101.72
2450	101.71
2449	101.72
2448	101.72
2447	101.72
2446	101.72
2445	101.73
2444	101.74
2443	101.75
2442	101.76
2441	101.77
2440	101.76
2439	101.76
2438	101.76
2437	101.77
2436	101.77
2435	101.77
2434	101.76
2433	101.76
2432	101.77
2431	101.78
2430	101.79
2429	101.8
2428	101.81
2427	101.82
2426	101.83
2425	101.83
2424	101.82
2423	101.81
2422	101.81
2421	101.8
2420	101.8
2419	101.8
2418	101.8
2417	101.8
2416	101.8
2415	101.81
2414	101.81
2413	101.82
2412	101.81
2411	101.8
2410	101.79
2409	101.79
2408	101.81
2407	101.83
2406	101.86
2405	101.86
2404	101.86
2403	101.86
2402	101.86
2401	101.86
2400	101.88
2399	101.88
2398	101.87
2397	101.86
2396	101.86
2395	101.85
2394	101.85
2393	101.85
2392	101.84
2391	101.84
2390	101.84
2389	101.85
2388	101.86
2387	101.86
2386	101.85
2385	101.83
2384	101.81
2383	101.79
2382	101.76
2381	101.74
2380	101.73
2379	101.72
2378	101.75
2377	101.79
2376	101.85
2375	101.9
2374	101.91
2373	101.92
2372	101.91
2371	101.89
2370	101.87
2369	101.83
2368	101.81
2367	101.79
2366	101.77
2365	101.76
2364	101.78
2363	101.81
2362	101.84
2361	101.87
2360	101.91
2359	101.99
2358	102.07
2357	102.16
2356	102.24
2355	102.25
2354	102.11
2353	101.92
2352	101.82
2351	101.85
2350	101.93
2349	101.9
2348	101.64
2347	101.27
2346	101.06
2345	101.13
2344	101.35
2343	101.54
2342	101.68
2341	101.79
2340	101.87
2339	101.92
2338	101.95
2337	101.97
2336	102.01
2335	102.06
2334	102.1
2333	102.1
2332	102.09
2331	102.09
2330	102.11
2329	102.11
2328	102.06
2327	101.94
2326	101.79
2325	101.64
2324	101.57
2323	101.59
2322	101.67
2321	101.76
2320	101.83
2319	101.86
2318	101.88
2317	101.87
2316	101.84
2315	101.79
2314	101.74
2313	101.7
2312	101.68
2311	101.66
2310	101.66
2309	101.65
2308	101.63
2307	101.61
2306	101.6
2305	101.58
2304	101.55
2303	101.52
2302	101.5
2301	101.49
2300	101.49
2299	101.49
2298	101.47
2297	101.44
2296	101.4
2295	101.37
2294	101.35
2293	101.35
2292	101.34
2291	101.31
2290	101.28
2289	101.26
2288	101.24
2287	101.23
2286	101.22
2285	101.22
2284	101.2
2283	101.19
2282	101.18
2281	101.19
2280	101.21
2279	101.23
2278	101.25
2277	101.26
2276	101.28
2275	101.31
2274	101.35
2273	101.39
2272	101.41
2271	101.41
2270	101.39
2269	101.38
2268	101.39
2267	101.41
2266	101.45
2265	101.48
2264	101.49
2263	101.47
2262	101.45
2261	101.44
2260	101.44
2259	101.44
2258	101.46
2257	101.49
2256	101.53
2255	101.56
2254	101.57
2253	101.56
2252	101.55
2251	101.54
2250	101.53
2249	101.53
2248	101.52
2247	101.52
2246	101.51
2245	101.5
2244	101.48
2243	101.46
2242	101.45
2241	101.45
2240	101.46
2239	101.47
2238	101.48
2237	101.49
2236	101.48
2235	101.47
2234	101.45
2233	101.44
2232	101.43
2231	101.43
2230	101.44
2229	101.46
2228	101.48
2227	101.5
2226	101.53
2225	101.55
2224	101.55
2223	101.53
2222	101.5
2221	101.47
2220	101.44
2219	101.41
2218	101.4
2217	101.41
2216	101.43
2215	101.46
2214	101.49
2213	101.52
2212	101.54
2211	101.52
2210	101.49
2209	101.46
2208	101.42
2207	101.38
2206	101.36
2205	101.34
2204	101.33
2203	101.35
2202	101.39
2201	101.46
2200	101.51
2199	101.52
2198	101.5
2197	101.45
2196	101.38
2195	101.31
2194	101.26
2193	101.23
2192	101.22
2191	101.22
2190	101.23
2189	101.23
2188	101.23
2187	101.23
2186	101.26
2185	101.3
2184	101.34
2183	101.37
2182	101.4
2181	101.42
2180	101.39
2179	101.34
2178	101.33
2177	101.4
2176	101.53
2175	101.64
2174	101.67
2173	101.59
2172	101.42
2171	101.24
2170	101.11
2169	101.06
2168	101.04
2167	101.04
2166	101.02
2165	100.96
2164	100.87
2163	100.77
2162	100.76
2161	100.92
2160	101.3
2159	101.79
2158	102.24
2157	102.5
2156	102.56
2155	102.47
2154	102.33
2153	102.18
2152	102.05
2151	101.99
2150	102.01
2149	102.07
2148	102.12
2147	102.14
2146	102.15
2145	102.15
2144	102.14
2143	102.12
2142	102.09
2141	102.06
2140	102.05
2139	102.05
2138	102.09
2137	102.18
2136	102.28
2135	102.35
2134	102.38
2133	102.36
2132	102.29
2131	102.2
2130	102.13
2129	102.07
2128	102.02
2127	101.98
2126	101.95
2125	101.94
2124	101.92
2123	101.89
2122	101.86
2121	101.82
2120	101.77
2119	101.71
2118	101.64
2117	101.6
2116	101.57
2115	101.57
2114	101.59
2113	101.6
2112	101.61
2111	101.6
2110	101.59
2109	101.59
2108	101.58
2107	101.57
2106	101.57
2105	101.57
2104	101.55
2103	101.54
2102	101.53
2101	101.53
2100	101.52
2099	101.52
2098	101.54
2097	101.58
2096	101.65
2095	101.71
2094	101.73
2093	101.71
2092	101.66
2091	101.62
2090	101.61
2089	101.62
2088	101.62
2087	101.59
2086	101.53
2085	101.47
2084	101.42
2083	101.38
2082	101.38
2081	101.38
2080	101.37
2079	101.35
2078	101.34
2077	101.34
2076	101.35
2075	101.34
2074	101.34
2073	101.34
2072	101.33
2071	101.33
2070	101.32
2069	101.33
2068	101.35
2067	101.37
2066	101.38
2065	101.4
2064	101.4
2063	101.39
2062	101.37
2061	101.36
2060	101.35
2059	101.31
2058	101.27
2057	101.24
2056	101.22
2055	101.2
2054	101.13
2053	101
2052	100.83
2051	100.73
2050	100.76
2049	100.9
2048	101.02
2047	101.07
2046	101.08
2045	101.09
2044	101.09
2043	101.06
2042	101.03
2041	101.02
2040	101.03
2039	101.01
2038	100.98
2037	100.95
2036	100.95
2035	100.99
2034	101.08
2033	101.19
2032	101.27
2031	101.3
2030	101.32
2029	101.34
2028	101.34
2027	101.34
2026	101.35
2025	101.39
2024	101.41
2023	101.4
2022	101.36
2021	101.32
2020	101.28
2019	101.26
2018	101.29
2017	101.36
2016	101.41
2015	101.42
2014	101.41
2013	101.41
2012	101.4
2011	101.35
2010	101.32
2009	101.35
2008	101.45
2007	101.58
2006	101.69
2005	101.74
2004	101.72
2003	101.65
[truncated: 1,603 more rows]

## Sheet: PET
Created as New Dataset	Sample 009 By Administrator Date Monday	June 27 2022
cm-1	%T
4000	101.12
3999	101.11
3998	101.11
3997	101.1
3996	101.1
3995	101.09
3994	101.08
3993	101.07
3992	101.09
3991	101.1
3990	101.12
3989	101.12
3988	101.13
3987	101.13
3986	101.13
3985	101.12
3984	101.11
3983	101.1
3982	101.1
3981	101.09
3980	101.07
3979	101.05
3978	101.04
3977	101.03
3976	101.03
3975	101.03
3974	101.03
3973	101.02
3972	101.02
3971	101.04
3970	101.06
3969	101.08
3968	101.09
3967	101.08
3966	101.05
3965	101.02
3964	101.01
3963	101.01
3962	101.01
3961	101.01
3960	101.01
3959	101.03
3958	101.04
3957	101.05
3956	101.03
3955	100.99
3954	100.93
3953	100.84
3952	100.75
3951	100.69
3950	100.68
3949	100.7
3948	100.7
3947	100.68
3946	100.67
3945	100.72
3944	100.8
3943	100.86
3942	100.85
3941	100.85
3940	100.91
3939	100.99
3938	101.01
3937	100.92
3936	100.78
3935	100.68
3934	100.64
3933	100.65
3932	100.68
3931	100.69
3930	100.66
3929	100.61
3928	100.57
3927	100.58
3926	100.61
3925	100.59
3924	100.52
3923	100.45
3922	100.46
3921	100.49
3920	100.54
3919	100.62
3918	100.75
3917	100.87
3916	100.92
3915	100.95
3914	101.01
3913	101.09
3912	101.13
3911	101.07
3910	100.9
3909	100.64
3908	100.33
3907	100.04
3906	99.82
3905	99.68
3904	99.6
3903	99.58
3902	99.74
3901	100.08
3900	100.41
3899	100.56
3898	100.54
3897	100.48
3896	100.45
3895	100.4
3894	100.39
3893	100.49
3892	100.62
3891	100.51
3890	100.21
3889	100.07
3888	100.24
3887	100.49
3886	100.52
3885	100.21
3884	99.84
3883	99.82
3882	100.13
3881	100.46
3880	100.51
3879	100.31
3878	100.19
3877	100.27
3876	100.35
3875	100.18
3874	99.77
3873	99.42
3872	99.44
3871	99.77
3870	99.94
3869	99.71
3868	99.49
3867	99.64
3866	99.95
3865	100.12
3864	100.14
3863	100.14
3862	100.2
3861	100.26
3860	100.2
3859	99.98
3858	99.62
3857	99.19
3856	98.86
3855	98.89
3854	99.34
3853	99.44
3852	98.97
3851	98.9
3850	99.47
3849	100.08
3848	100.42
3847	100.5
3846	100.43
3845	100.25
3844	99.98
3843	99.6
3842	99.24
3841	99.06
3840	99.1
3839	99.25
3838	99.33
3837	99.27
3836	99.26
3835	99.45
3834	99.83
3833	100.2
3832	100.4
3831	100.38
3830	100.31
3829	100.32
3828	100.4
3827	100.33
3826	100
3825	99.59
3824	99.38
3823	99.45
3822	99.65
3821	99.57
3820	99.16
3819	99.05
3818	99.54
3817	100.19
3816	100.45
3815	100.28
3814	100.15
3813	100.34
3812	100.56
3811	100.54
3810	100.41
3809	100.38
3808	100.44
3807	100.25
3806	99.73
3805	99.3
3804	99.33
3803	99.67
3802	99.92
3801	99.7
3800	99.29
3799	99.35
3798	99.88
3797	100.41
3796	100.65
3795	100.71
3794	100.8
3793	100.97
3792	101.09
3791	101.11
3790	101.03
3789	100.91
3788	100.79
3787	100.72
3786	100.69
3785	100.64
3784	100.51
3783	100.39
3782	100.39
3781	100.52
3780	100.67
3779	100.71
3778	100.68
3777	100.72
3776	100.84
3775	100.84
3774	100.69
3773	100.51
3772	100.45
3771	100.47
3770	100.42
3769	100.28
3768	100.23
3767	100.4
3766	100.6
3765	100.59
3764	100.41
3763	100.27
3762	100.24
3761	100.22
3760	100.15
3759	100.06
3758	99.92
3757	99.72
3756	99.51
3755	99.28
3754	98.98
3753	98.67
3752	98.59
3751	98.74
3750	98.72
3749	98.43
3748	98.33
3747	98.7
3746	99.42
3745	100.04
3744	99.93
3743	99.32
3742	99.1
3741	99.31
3740	99.38
3739	99.17
3738	98.87
3737	98.71
3736	98.75
3735	98.92
3734	99.21
3733	99.6
3732	99.89
3731	99.98
3730	100.01
3729	100.12
3728	100.24
3727	100.24
3726	100.12
3725	100.03
3724	100.07
3723	100.18
3722	100.28
3721	100.34
3720	100.43
3719	100.53
3718	100.52
3717	100.36
3716	100.11
3715	99.85
3714	99.64
3713	99.55
3712	99.64
3711	99.79
3710	99.91
3709	100.08
3708	100.32
3707	100.51
3706	100.59
3705	100.59
3704	100.61
3703	100.68
3702	100.75
3701	100.72
3700	100.67
3699	100.72
3698	100.84
3697	100.87
3696	100.71
3695	100.45
3694	100.12
3693	99.76
3692	99.43
3691	99.34
3690	99.58
3689	99.86
3688	99.92
3687	99.92
3686	100.16
3685	100.53
3684	100.77
3683	100.77
3682	100.6
3681	100.31
3680	99.85
3679	99.29
3678	98.93
3677	99.02
3676	99.36
3675	99.26
3674	98.85
3673	98.89
3672	99.39
3671	99.91
3670	100.2
3669	100.18
3668	100.18
3667	100.48
3666	100.87
3665	101.12
3664	101.21
3663	101.19
3662	101.08
3661	100.88
3660	100.66
3659	100.54
3658	100.6
3657	100.7
3656	100.58
3655	100.18
3654	99.76
3653	99.41
3652	99.01
3651	98.67
3650	98.7
3649	99.02
3648	99.28
3647	99.48
3646	99.79
3645	100.22
3644	100.63
3643	100.89
3642	100.99
3641	100.98
3640	100.96
3639	100.93
3638	100.85
3637	100.76
3636	100.7
3635	100.61
3634	100.37
3633	99.99
3632	99.67
3631	99.62
3630	99.95
3629	100.34
3628	100.33
3627	100.19
3626	100.36
3625	100.63
3624	100.66
3623	100.46
3622	100.23
3621	100.1
3620	100.09
3619	100.04
3618	99.88
3617	99.76
3616	99.81
3615	99.97
3614	100.1
3613	100.14
3612	100.15
3611	100.25
3610	100.48
3609	100.72
3608	100.86
3607	100.87
3606	100.84
3605	100.85
3604	100.86
3603	100.81
3602	100.74
3601	100.64
3600	100.54
3599	100.46
3598	100.43
3597	100.46
3596	100.56
3595	100.66
3594	100.7
3593	100.65
3592	100.55
3591	100.43
3590	100.33
3589	100.34
3588	100.47
3587	100.59
3586	100.63
3585	100.74
3584	100.93
3583	101.1
3582	101.19
3581	101.21
3580	101.21
3579	101.21
3578	101.2
3577	101.2
3576	101.22
3575	101.24
3574	101.21
3573	101.1
3572	100.89
3571	100.59
3570	100.27
3569	100.06
3568	100.06
3567	100.19
3566	100.3
3565	100.41
3564	100.6
3563	100.83
3562	101.03
3561	101.16
3560	101.26
3559	101.32
3558	101.34
3557	101.32
3556	101.25
3555	101.18
3554	101.14
3553	101.12
3552	101.09
3551	101.02
3550	100.94
3549	100.89
3548	100.86
3547	100.87
3546	100.93
3545	101.02
3544	101.13
3543	101.25
3542	101.35
3541	101.41
3540	101.42
3539	101.4
3538	101.39
3537	101.4
3536	101.42
3535	101.43
3534	101.43
3533	101.4
3532	101.34
3531	101.25
3530	101.17
3529	101.11
3528	101.06
3527	101.02
3526	101.02
3525	101.09
3524	101.19
3523	101.29
3522	101.36
3521	101.42
3520	101.49
3519	101.55
3518	101.58
3517	101.59
3516	101.58
3515	101.57
3514	101.53
3513	101.47
3512	101.44
3511	101.43
3510	101.45
3509	101.45
3508	101.42
3507	101.37
3506	101.32
3505	101.28
3504	101.28
3503	101.32
3502	101.38
3501	101.45
3500	101.51
3499	101.55
3498	101.58
3497	101.59
3496	101.6
3495	101.62
3494	101.64
3493	101.66
3492	101.67
3491	101.66
3490	101.65
3489	101.64
3488	101.63
3487	101.61
3486	101.58
3485	101.56
3484	101.55
3483	101.54
3482	101.55
3481	101.57
3480	101.6
3479	101.65
3478	101.69
3477	101.72
3476	101.73
3475	101.73
3474	101.73
3473	101.73
3472	101.72
3471	101.7
3470	101.69
3469	101.69
3468	101.7
3467	101.7
3466	101.7
3465	101.69
3464	101.68
3463	101.68
3462	101.69
3461	101.71
3460	101.74
3459	101.78
3458	101.82
3457	101.85
3456	101.85
3455	101.85
3454	101.85
3453	101.83
3452	101.8
3451	101.74
3450	101.68
3449	101.64
3448	101.62
3447	101.61
3446	101.61
3445	101.63
3444	101.69
3443	101.74
3442	101.78
3441	101.78
3440	101.78
3439	101.79
3438	101.79
3437	101.78
3436	101.78
3435	101.77
3434	101.78
3433	101.78
3432	101.78
3431	101.79
3430	101.8
3429	101.82
3428	101.84
3427	101.85
3426	101.85
3425	101.83
3424	101.8
3423	101.77
3422	101.76
3421	101.77
3420	101.8
3419	101.84
3418	101.88
3417	101.91
3416	101.92
3415	101.93
3414	101.92
3413	101.92
3412	101.92
3411	101.92
3410	101.92
3409	101.93
3408	101.94
3407	101.95
3406	101.95
3405	101.94
3404	101.92
3403	101.91
3402	101.9
3401	101.89
3400	101.9
3399	101.91
3398	101.92
3397	101.9
3396	101.89
3395	101.88
3394	101.88
3393	101.9
3392	101.92
3391	101.95
3390	101.97
3389	101.99
3388	102
3387	102
3386	102
3385	102
3384	102.01
3383	102.01
3382	102.01
3381	102.01
3380	102.01
3379	102.02
3378	102.02
3377	102.03
3376	102.05
3375	102.05
3374	102.05
3373	102.04
3372	102.01
3371	101.99
3370	101.97
3369	101.95
3368	101.95
3367	101.96
3366	101.97
3365	101.98
3364	101.99
3363	102.01
3362	102.02
3361	102.04
3360	102.05
3359	102.06
3358	102.07
3357	102.07
3356	102.08
3355	102.07
3354	102.07
3353	102.06
3352	102.06
3351	102.07
3350	102.08
3349	102.11
3348	102.12
3347	102.13
3346	102.12
3345	102.11
3344	102.1
3343	102.09
3342	102.09
3341	102.07
3340	102.06
3339	102.05
3338	102.05
3337	102.07
3336	102.09
3335	102.12
3334	102.14
3333	102.15
3332	102.16
3331	102.16
3330	102.15
3329	102.13
3328	102.11
3327	102.1
3326	102.1
3325	102.11
3324	102.13
3323	102.16
3322	102.18
3321	102.19
3320	102.2
3319	102.2
3318	102.19
3317	102.18
3316	102.17
3315	102.15
3314	102.13
3313	102.11
3312	102.08
3311	102.06
3310	102.05
3309	102.06
3308	102.07
3307	102.08
3306	102.11
3305	102.13
3304	102.15
3303	102.17
3302	102.17
3301	102.16
3300	102.15
3299	102.14
3298	102.13
3297	102.12
3296	102.11
3295	102.1
3294	102.1
3293	102.1
3292	102.11
3291	102.13
3290	102.15
3289	102.17
3288	102.19
3287	102.19
3286	102.19
3285	102.2
3284	102.2
3283	102.21
3282	102.21
3281	102.2
3280	102.19
3279	102.18
3278	102.16
3277	102.13
3276	102.11
3275	102.1
3274	102.1
3273	102.1
3272	102.12
3271	102.14
3270	102.17
3269	102.19
3268	102.2
3267	102.21
3266	102.21
3265	102.2
3264	102.2
3263	102.2
3262	102.19
3261	102.19
3260	102.18
3259	102.17
3258	102.15
3257	102.13
3256	102.12
3255	102.13
3254	102.15
3253	102.17
3252	102.19
3251	102.18
3250	102.17
3249	102.13
3248	102.1
3247	102.08
3246	102.08
3245	102.09
3244	102.11
3243	102.13
3242	102.15
3241	102.15
3240	102.15
3239	102.14
3238	102.12
3237	102.09
3236	102.07
3235	102.05
3234	102.05
3233	102.06
3232	102.09
3231	102.11
3230	102.13
3229	102.14
3228	102.14
3227	102.15
3226	102.15
3225	102.15
3224	102.15
3223	102.14
3222	102.13
3221	102.11
3220	102.11
3219	102.1
3218	102.1
3217	102.1
3216	102.09
3215	102.09
3214	102.09
3213	102.09
3212	102.1
3211	102.11
3210	102.12
3209	102.12
3208	102.12
3207	102.13
3206	102.13
3205	102.14
3204	102.14
3203	102.13
3202	102.12
3201	102.1
3200	102.1
3199	102.1
3198	102.1
3197	102.1
3196	102.11
3195	102.11
3194	102.12
3193	102.12
3192	102.12
3191	102.12
3190	102.12
3189	102.11
3188	102.11
3187	102.1
3186	102.09
3185	102.09
3184	102.08
3183	102.08
3182	102.07
3181	102.07
3180	102.06
3179	102.06
3178	102.06
3177	102.06
3176	102.07
3175	102.08
3174	102.09
3173	102.09
3172	102.08
3171	102.08
3170	102.07
3169	102.07
3168	102.06
3167	102.06
3166	102.06
3165	102.06
3164	102.06
3163	102.05
3162	102.05
3161	102.04
3160	102.03
3159	102.02
3158	102.01
3157	101.99
3156	101.97
3155	101.95
3154	101.93
3153	101.93
3152	101.94
3151	101.95
3150	101.97
3149	101.98
3148	101.99
3147	101.99
3146	101.98
3145	101.98
3144	101.97
3143	101.95
3142	101.93
3141	101.92
3140	101.9
3139	101.9
3138	101.91
3137	101.91
3136	101.91
3135	101.91
3134	101.9
3133	101.89
3132	101.88
3131	101.88
3130	101.88
3129	101.89
3128	101.89
3127	101.88
3126	101.86
3125	101.83
3124	101.81
3123	101.79
3122	101.78
3121	101.77
3120	101.76
3119	101.76
3118	101.75
3117	101.75
3116	101.76
3115	101.78
3114	101.8
3113	101.82
3112	101.82
3111	101.81
3110	101.81
3109	101.81
3108	101.82
3107	101.83
3106	101.84
3105	101.83
3104	101.82
3103	101.8
3102	101.79
3101	101.78
3100	101.79
3099	101.81
3098	101.83
3097	101.84
3096	101.85
3095	101.86
3094	101.85
3093	101.85
3092	101.84
3091	101.82
3090	101.82
3089	101.81
3088	101.81
3087	101.8
3086	101.8
3085	101.79
3084	101.78
3083	101.77
3082	101.76
3081	101.75
3080	101.75
3079	101.76
3078	101.78
3077	101.8
3076	101.81
3075	101.82
3074	101.83
3073	101.83
3072	101.82
3071	101.81
3070	101.78
3069	101.76
3068	101.74
3067	101.74
3066	101.75
3065	101.77
3064	101.79
3063	101.8
3062	101.81
3061	101.81
3060	101.81
3059	101.79
3058	101.77
3057	101.76
3056	101.76
3055	101.76
3054	101.76
3053	101.76
3052	101.75
3051	101.75
3050	101.75
3049	101.75
3048	101.76
3047	101.76
3046	101.76
3045	101.76
3044	101.76
3043	101.77
3042	101.77
3041	101.78
3040	101.79
3039	101.79
3038	101.78
3037	101.75
3036	101.72
3035	101.69
3034	101.68
3033	101.68
3032	101.69
3031	101.71
3030	101.72
3029	101.73
3028	101.74
3027	101.73
3026	101.72
3025	101.71
3024	101.71
3023	101.71
3022	101.7
3021	101.7
3020	101.69
3019	101.68
3018	101.68
3017	101.67
3016	101.66
3015	101.64
3014	101.63
3013	101.62
3012	101.61
3011	101.62
3010	101.63
3009	101.65
3008	101.66
3007	101.67
3006	101.66
3005	101.66
3004	101.66
3003	101.66
3002	101.66
3001	101.65
3000	101.65
2999	101.63
2998	101.62
2997	101.61
2996	101.6
2995	101.59
2994	101.59
2993	101.59
2992	101.59
2991	101.6
2990	101.61
2989	101.61
2988	101.61
2987	101.6
2986	101.59
2985	101.58
2984	101.57
2983	101.56
2982	101.55
2981	101.54
2980	101.54
2979	101.54
2978	101.53
2977	101.51
2976	101.49
2975	101.48
2974	101.47
2973	101.48
2972	101.48
2971	101.48
2970	101.48
2969	101.47
2968	101.46
2967	101.45
2966	101.44
2965	101.43
2964	101.42
2963	101.42
2962	101.43
2961	101.44
2960	101.46
2959	101.47
2958	101.47
2957	101.47
2956	101.47
2955	101.47
2954	101.46
2953	101.46
2952	101.47
2951	101.49
2950	101.5
2949	101.5
2948	101.5
2947	101.49
2946	101.49
2945	101.48
2944	101.49
2943	101.51
2942	101.52
2941	101.53
2940	101.53
2939	101.52
2938	101.51
2937	101.5
2936	101.49
2935	101.48
2934	101.46
2933	101.44
2932	101.41
2931	101.39
2930	101.38
2929	101.39
2928	101.4
2927	101.41
2926	101.43
2925	101.45
2924	101.47
2923	101.48
2922	101.5
2921	101.51
2920	101.53
2919	101.54
2918	101.56
2917	101.57
2916	101.57
2915	101.55
2914	101.53
2913	101.5
2912	101.48
2911	101.47
2910	101.46
2909	101.46
2908	101.45
2907	101.45
2906	101.44
2905	101.45
2904	101.45
2903	101.46
2902	101.47
2901	101.47
2900	101.48
2899	101.48
2898	101.48
2897	101.48
2896	101.49
2895	101.5
2894	101.51
2893	101.52
2892	101.54
2891	101.55
2890	101.55
2889	101.55
2888	101.55
2887	101.55
2886	101.54
2885	101.54
2884	101.54
2883	101.54
2882	101.54
2881	101.54
2880	101.54
2879	101.53
2878	101.52
2877	101.51
2876	101.49
2875	101.47
2874	101.46
2873	101.45
2872	101.45
2871	101.46
2870	101.46
2869	101.46
2868	101.45
2867	101.45
2866	101.44
2865	101.44
2864	101.43
2863	101.43
2862	101.43
2861	101.43
2860	101.43
2859	101.44
2858	101.44
2857	101.44
2856	101.44
2855	101.44
2854	101.44
2853	101.45
2852	101.47
2851	101.49
2850	101.52
2849	101.54
2848	101.55
2847	101.55
2846	101.54
2845	101.53
2844	101.51
2843	101.5
2842	101.49
2841	101.47
2840	101.46
2839	101.46
2838	101.46
2837	101.47
2836	101.48
2835	101.48
2834	101.48
2833	101.49
2832	101.49
2831	101.49
2830	101.5
2829	101.5
2828	101.5
2827	101.5
2826	101.5
2825	101.5
2824	101.5
2823	101.5
2822	101.5
2821	101.5
2820	101.5
2819	101.5
2818	101.5
2817	101.5
2816	101.5
2815	101.5
2814	101.49
2813	101.48
2812	101.47
2811	101.47
2810	101.47
2809	101.47
2808	101.47
2807	101.47
2806	101.47
2805	101.47
2804	101.48
2803	101.48
2802	101.48
2801	101.47
2800	101.46
2799	101.45
2798	101.44
2797	101.45
2796	101.45
2795	101.45
2794	101.45
2793	101.45
2792	101.45
2791	101.45
2790	101.46
2789	101.47
2788	101.47
2787	101.48
2786	101.48
2785	101.48
2784	101.48
2783	101.47
2782	101.47
2781	101.48
2780	101.48
2779	101.47
2778	101.47
2777	101.46
2776	101.46
2775	101.46
2774	101.46
2773	101.46
2772	101.46
2771	101.47
2770	101.47
2769	101.47
2768	101.48
2767	101.48
2766	101.47
2765	101.47
2764	101.47
2763	101.47
2762	101.47
2761	101.46
2760	101.46
2759	101.46
2758	101.46
2757	101.46
2756	101.46
2755	101.46
2754	101.47
2753	101.46
2752	101.46
2751	101.45
2750	101.44
2749	101.43
2748	101.43
2747	101.43
2746	101.43
2745	101.44
2744	101.44
2743	101.44
2742	101.44
2741	101.44
2740	101.44
2739	101.44
2738	101.44
2737	101.45
2736	101.45
2735	101.45
2734	101.44
2733	101.44
2732	101.44
2731	101.43
2730	101.43
2729	101.43
2728	101.43
2727	101.43
2726	101.42
2725	101.42
2724	101.42
2723	101.43
2722	101.43
2721	101.44
2720	101.44
2719	101.44
2718	101.44
2717	101.43
2716	101.43
2715	101.43
2714	101.43
2713	101.42
2712	101.42
2711	101.42
2710	101.42
2709	101.42
2708	101.43
2707	101.43
2706	101.44
2705	101.44
2704	101.44
2703	101.44
2702	101.43
2701	101.42
2700	101.42
2699	101.41
2698	101.41
2697	101.41
2696	101.42
2695	101.42
2694	101.42
2693	101.43
2692	101.43
2691	101.43
2690	101.43
2689	101.42
2688	101.42
2687	101.42
2686	101.41
2685	101.41
2684	101.41
2683	101.41
2682	101.42
2681	101.42
2680	101.43
2679	101.42
2678	101.42
2677	101.41
2676	101.4
2675	101.4
2674	101.4
2673	101.41
2672	101.41
2671	101.41
2670	101.41
2669	101.4
2668	101.4
2667	101.39
2666	101.38
2665	101.37
2664	101.36
2663	101.34
2662	101.32
2661	101.3
2660	101.29
2659	101.28
2658	101.27
2657	101.26
2656	101.26
2655	101.25
2654	101.25
2653	101.25
2652	101.24
2651	101.24
2650	101.23
2649	101.23
2648	101.23
2647	101.23
2646	101.23
2645	101.23
2644	101.23
2643	101.23
2642	101.22
2641	101.22
2640	101.22
2639	101.22
2638	101.22
2637	101.22
2636	101.22
2635	101.22
2634	101.23
2633	101.23
2632	101.23
2631	101.23
2630	101.23
2629	101.23
2628	101.23
2627	101.24
2626	101.25
2625	101.26
2624	101.26
2623	101.27
2622	101.27
2621	101.28
2620	101.29
2619	101.28
2618	101.28
2617	101.27
2616	101.26
2615	101.26
2614	101.26
2613	101.27
2612	101.28
2611	101.28
2610	101.28
2609	101.29
2608	101.29
2607	101.29
2606	101.29
2605	101.28
2604	101.29
2603	101.29
2602	101.3
2601	101.3
2600	101.31
2599	101.31
2598	101.31
2597	101.31
2596	101.31
2595	101.3
2594	101.31
2593	101.31
2592	101.31
2591	101.3
2590	101.29
2589	101.28
2588	101.29
2587	101.3
2586	101.31
2585	101.32
2584	101.32
2583	101.32
2582	101.32
2581	101.32
2580	101.31
2579	101.31
2578	101.31
2577	101.32
2576	101.33
2575	101.33
2574	101.33
2573	101.33
2572	101.32
2571	101.32
2570	101.33
2569	101.33
2568	101.34
2567	101.34
2566	101.34
2565	101.34
2564	101.33
2563	101.33
2562	101.33
2561	101.34
2560	101.35
2559	101.36
2558	101.35
2557	101.35
2556	101.35
2555	101.34
2554	101.34
2553	101.34
2552	101.33
2551	101.33
2550	101.33
2549	101.34
2548	101.35
2547	101.37
2546	101.38
2545	101.39
2544	101.39
2543	101.39
2542	101.39
2541	101.38
2540	101.37
2539	101.35
2538	101.35
2537	101.34
2536	101.35
2535	101.35
2534	101.36
2533	101.36
2532	101.37
2531	101.38
2530	101.38
2529	101.38
2528	101.38
2527	101.38
2526	101.38
2525	101.38
2524	101.37
2523	101.36
2522	101.36
2521	101.36
2520	101.37
2519	101.39
2518	101.4
2517	101.41
2516	101.41
2515	101.41
2514	101.4
2513	101.39
2512	101.39
2511	101.4
2510	101.4
2509	101.4
2508	101.4
2507	101.41
2506	101.41
2505	101.42
2504	101.42
2503	101.42
2502	101.41
2501	101.41
2500	101.41
2499	101.41
2498	101.41
2497	101.41
2496	101.41
2495	101.4
2494	101.39
2493	101.38
2492	101.38
2491	101.38
2490	101.38
2489	101.39
2488	101.4
2487	101.4
2486	101.4
2485	101.41
2484	101.43
2483	101.44
2482	101.44
2481	101.44
2480	101.43
2479	101.42
2478	101.42
2477	101.41
2476	101.41
2475	101.41
2474	101.41
2473	101.42
2472	101.43
2471	101.43
2470	101.43
2469	101.43
2468	101.43
2467	101.43
2466	101.42
2465	101.42
2464	101.41
2463	101.4
2462	101.39
2461	101.39
2460	101.39
2459	101.39
2458	101.39
2457	101.38
2456	101.37
2455	101.35
2454	101.34
2453	101.34
2452	101.35
2451	101.36
2450	101.37
2449	101.37
2448	101.37
2447	101.35
2446	101.34
2445	101.34
2444	101.34
2443	101.35
2442	101.36
2441	101.37
2440	101.38
2439	101.38
2438	101.38
2437	101.39
2436	101.39
2435	101.39
2434	101.38
2433	101.38
2432	101.38
2431	101.39
2430	101.4
2429	101.4
2428	101.4
2427	101.41
2426	101.42
2425	101.43
2424	101.43
2423	101.43
2422	101.41
2421	101.4
2420	101.39
2419	101.39
2418	101.39
2417	101.4
2416	101.41
2415	101.42
2414	101.43
2413	101.43
2412	101.42
2411	101.41
2410	101.4
2409	101.4
2408	101.41
2407	101.43
2406	101.44
2405	101.44
2404	101.44
2403	101.44
2402	101.43
2401	101.43
2400	101.44
2399	101.44
2398	101.45
2397	101.45
2396	101.45
2395	101.46
2394	101.45
2393	101.45
2392	101.45
2391	101.44
2390	101.43
2389	101.42
2388	101.41
2387	101.41
2386	101.4
2385	101.38
2384	101.35
2383	101.32
2382	101.29
2381	101.25
2380	101.21
2379	101.16
2378	101.12
2377	101.1
2376	101.11
2375	101.13
2374	101.15
2373	101.18
2372	101.21
2371	101.23
2370	101.23
2369	101.22
2368	101.21
2367	101.2
2366	101.19
2365	101.17
2364	101.15
2363	101.11
2362	101.07
2361	101.04
2360	101.06
2359	101.1
2358	101.16
2357	101.2
2356	101.25
2355	101.33
2354	101.42
2353	101.53
2352	101.58
2351	101.46
2350	101.16
2349	100.86
2348	100.76
2347	100.85
2346	101.03
2345	101.13
2344	101.05
2343	100.85
2342	100.75
2341	100.82
2340	100.93
2339	101
2338	101.07
2337	101.13
2336	101.17
2335	101.18
2334	101.19
2333	101.23
2332	101.32
2331	101.4
2330	101.43
2329	101.39
2328	101.31
2327	101.18
2326	101.06
2325	100.98
2324	100.97
2323	101.03
2322	101.13
2321	101.22
2320	101.3
2319	101.34
2318	101.37
2317	101.38
2316	101.39
2315	101.41
2314	101.44
2313	101.44
2312	101.41
2311	101.36
2310	101.33
2309	101.31
2308	101.3
2307	101.29
2306	101.27
2305	101.25
2304	101.23
2303	101.22
2302	101.22
2301	101.21
2300	101.19
2299	101.16
2298	101.13
2297	101.1
2296	101.08
2295	101.06
2294	101.05
2293	101.03
2292	101.01
2291	100.99
2290	100.96
2289	100.93
2288	100.92
2287	100.91
2286	100.9
2285	100.9
2284	100.9
2283	100.91
2282	100.92
2281	100.94
2280	100.96
2279	100.98
2278	100.99
2277	101
2276	101
2275	101.01
2274	101.04
2273	101.06
2272	101.07
2271	101.07
2270	101.05
2269	101.04
2268	101.05
2267	101.06
2266	101.09
2265	101.11
2264	101.12
2263	101.11
2262	101.1
2261	101.1
2260	101.1
2259	101.1
2258	101.1
2257	101.11
2256	101.12
2255	101.12
2254	101.12
2253	101.12
2252	101.11
2251	101.12
2250	101.13
2249	101.13
2248	101.12
2247	101.1
2246	101.08
2245	101.07
2244	101.06
2243	101.06
2242	101.07
2241	101.09
2240	101.12
2239	101.15
2238	101.18
2237	101.21
2236	101.21
2235	101.18
2234	101.16
2233	101.14
2232	101.14
2231	101.14
2230	101.13
2229	101.12
2228	101.12
2227	101.14
2226	101.18
2225	101.22
2224	101.22
2223	101.18
2222	101.14
2221	101.1
2220	101.09
2219	101.09
2218	101.1
2217	101.12
2216	101.14
2215	101.18
2214	101.22
2213	101.24
2212	101.23
2211	101.18
2210	101.14
2209	101.11
2208	101.09
2207	101.09
2206	101.1
2205	101.12
2204	101.14
2203	101.15
2202	101.16
2201	101.18
2200	101.19
2199	101.17
2198	101.12
2197	101.06
2196	101.01
2195	100.96
2194	100.93
2193	100.92
2192	100.93
2191	100.95
2190	100.97
2189	100.96
2188	100.94
2187	100.92
2186	100.94
2185	100.98
2184	101.01
2183	101.03
2182	101.08
2181	101.13
2180	101.15
2179	101.13
2178	101.11
2177	101.12
2176	101.16
2175	101.2
2174	101.22
2173	101.19
2172	101.11
2171	101.01
2170	100.93
2169	100.86
2168	100.77
2167	100.67
2166	100.59
2165	100.54
2164	100.52
2163	100.5
2162	100.53
2161	100.69
2160	101.02
2159	101.46
2158	101.85
2157	102.06
2156	102.07
2155	101.96
2154	101.82
2153	101.69
2152	101.61
2151	101.57
2150	101.59
2149	101.62
2148	101.62
2147	101.6
2146	101.59
2145	101.59
2144	101.57
2143	101.55
2142	101.53
2141	101.53
2140	101.53
2139	101.55
2138	101.6
2137	101.67
2136	101.73
2135	101.75
2134	101.74
2133	101.7
2132	101.64
2131	101.6
2130	101.58
2129	101.59
2128	101.58
2127	101.54
2126	101.49
2125	101.45
2124	101.42
2123	101.4
2122	101.39
2121	101.36
2120	101.33
2119	101.29
2118	101.25
2117	101.22
2116	101.21
2115	101.2
2114	101.2
2113	101.2
2112	101.19
2111	101.17
2110	101.15
2109	101.15
2108	101.16
2107	101.16
2106	101.16
2105	101.16
2104	101.15
2103	101.14
2102	101.13
2101	101.14
2100	101.14
2099	101.13
2098	101.13
2097	101.16
2096	101.21
2095	101.26
2094	101.28
2093	101.26
2092	101.22
2091	101.18
2090	101.17
2089	101.18
2088	101.18
2087	101.16
2086	101.12
2085	101.07
2084	101.03
2083	101.01
2082	101.02
2081	101.04
2080	101.06
2079	101.05
2078	101.04
2077	101.02
2076	100.99
2075	100.97
2074	100.96
2073	100.95
2072	100.94
2071	100.93
2070	100.92
2069	100.93
2068	100.96
2067	101
2066	101.03
2065	101.07
2064	101.08
2063	101.08
2062	101.08
2061	101.08
2060	101.06
2059	101.03
2058	101
2057	100.98
2056	100.97
2055	100.95
2054	100.89
2053	100.79
2052	100.65
2051	100.54
2050	100.53
2049	100.63
2048	100.78
2047	100.89
2046	100.93
2045	100.92
2044	100.87
2043	100.81
2042	100.78
2041	100.78
2040	100.76
2039	100.7
2038	100.62
2037	100.59
2036	100.61
2035	100.67
2034	100.75
2033	100.84
2032	100.91
2031	100.94
2030	100.96
2029	100.98
2028	101
2027	101
2026	101.01
2025	101.01
2024	100.98
2023	100.92
2022	100.88
2021	100.88
2020	100.91
2019	100.92
2018	100.95
2017	101.02
2016	101.08
2015	101.1
2014	101.11
2013	101.1
2012	101.07
2011	101.01
2010	100.97
2009	101
2008	101.09
2007	101.2
2006	101.29
2005	101.33
2004	101.32
2003	101.27
[truncated: 1,603 more rows]

## Sheet: Poly (Propylene Ethylene)
Created as New Dataset	Sample 035 By Administrator Date Monday	June 27 2022
cm-1	%T
4000	100.78
3999	100.78
3998	100.78
3997	100.78
3996	100.77
3995	100.76
3994	100.75
3993	100.74
3992	100.75
3991	100.77
3990	100.78
3989	100.79
3988	100.79
3987	100.79
3986	100.79
3985	100.78
3984	100.78
3983	100.78
3982	100.77
3981	100.77
3980	100.75
3979	100.74
3978	100.72
3977	100.72
3976	100.72
3975	100.73
3974	100.73
3973	100.73
3972	100.73
3971	100.74
3970	100.75
3969	100.76
3968	100.77
3967	100.75
3966	100.73
3965	100.71
3964	100.7
3963	100.71
3962	100.71
3961	100.71
3960	100.71
3959	100.72
3958	100.73
3957	100.74
3956	100.73
3955	100.7
3954	100.65
3953	100.59
3952	100.52
3951	100.48
3950	100.48
3949	100.49
3948	100.49
3947	100.47
3946	100.46
3945	100.5
3944	100.56
3943	100.59
3942	100.58
3941	100.57
3940	100.61
3939	100.67
3938	100.69
3937	100.64
3936	100.54
3935	100.46
3934	100.43
3933	100.45
3932	100.48
3931	100.49
3930	100.47
3929	100.43
3928	100.4
3927	100.4
3926	100.42
3925	100.41
3924	100.35
3923	100.28
3922	100.27
3921	100.3
3920	100.34
3919	100.4
3918	100.5
3917	100.59
3916	100.63
3915	100.66
3914	100.71
3913	100.78
3912	100.81
3911	100.76
3910	100.63
3909	100.44
3908	100.2
3907	99.98
3906	99.8
3905	99.69
3904	99.63
3903	99.61
3902	99.72
3901	99.97
3900	100.22
3899	100.32
3898	100.31
3897	100.29
3896	100.29
3895	100.28
3894	100.27
3893	100.34
3892	100.42
3891	100.32
3890	100.08
3889	99.96
3888	100.08
3887	100.28
3886	100.33
3885	100.13
3884	99.87
3883	99.86
3882	100.09
3881	100.32
3880	100.33
3879	100.16
3878	100.07
3877	100.15
3876	100.24
3875	100.15
3874	99.84
3873	99.56
3872	99.55
3871	99.8
3870	99.95
3869	99.8
3868	99.63
3867	99.76
3866	100.02
3865	100.17
3864	100.17
3863	100.13
3862	100.14
3861	100.18
3860	100.15
3859	99.99
3858	99.71
3857	99.33
3856	99.03
3855	99.05
3854	99.46
3853	99.63
3852	99.33
3851	99.3
3850	99.75
3849	100.21
3848	100.43
3847	100.45
3846	100.36
3845	100.22
3844	100.01
3843	99.73
3842	99.47
3841	99.35
3840	99.4
3839	99.54
3838	99.62
3837	99.59
3836	99.57
3835	99.69
3834	99.93
3833	100.18
3832	100.3
3831	100.29
3830	100.25
3829	100.28
3828	100.36
3827	100.32
3826	100.08
3825	99.75
3824	99.56
3823	99.6
3822	99.77
3821	99.75
3820	99.43
3819	99.31
3818	99.67
3817	100.18
3816	100.4
3815	100.28
3814	100.18
3813	100.31
3812	100.47
3811	100.44
3810	100.31
3809	100.26
3808	100.3
3807	100.2
3806	99.85
3805	99.54
3804	99.57
3803	99.84
3802	100.06
3801	99.92
3800	99.6
3799	99.62
3798	99.99
3797	100.34
3796	100.47
3795	100.46
3794	100.51
3793	100.64
3792	100.75
3791	100.78
3790	100.73
3789	100.65
3788	100.58
3787	100.54
3786	100.54
3785	100.51
3784	100.4
3783	100.29
3782	100.27
3781	100.35
3780	100.45
3779	100.47
3778	100.44
3777	100.47
3776	100.57
3775	100.6
3774	100.49
3773	100.35
3772	100.29
3771	100.31
3770	100.28
3769	100.17
3768	100.14
3767	100.27
3766	100.43
3765	100.43
3764	100.3
3763	100.2
3762	100.19
3761	100.18
3760	100.14
3759	100.07
3758	99.96
3757	99.83
3756	99.67
3755	99.49
3754	99.28
3753	99.1
3752	99.12
3751	99.3
3750	99.31
3749	99.09
3748	98.96
3747	99.15
3746	99.59
3745	99.98
3744	99.92
3743	99.53
3742	99.45
3741	99.67
3740	99.75
3739	99.56
3738	99.31
3737	99.19
3736	99.23
3735	99.35
3734	99.52
3733	99.75
3732	99.95
3731	100.02
3730	100.06
3729	100.16
3728	100.25
3727	100.26
3726	100.17
3725	100.09
3724	100.11
3723	100.19
3722	100.26
3721	100.29
3720	100.34
3719	100.4
3718	100.41
3717	100.31
3716	100.14
3715	99.95
3714	99.81
3713	99.75
3712	99.82
3711	99.9
3710	99.94
3709	100.03
3708	100.22
3707	100.4
3706	100.49
3705	100.51
3704	100.53
3703	100.57
3702	100.6
3701	100.56
3700	100.51
3699	100.55
3698	100.67
3697	100.72
3696	100.62
3695	100.42
3694	100.18
3693	99.91
3692	99.67
3691	99.62
3690	99.81
3689	100.01
3688	100.05
3687	100.06
3686	100.25
3685	100.54
3684	100.7
3683	100.68
3682	100.55
3681	100.32
3680	99.97
3679	99.54
3678	99.25
3677	99.31
3676	99.58
3675	99.51
3674	99.19
3673	99.21
3672	99.63
3671	100.06
3670	100.29
3669	100.23
3668	100.18
3667	100.38
3666	100.69
3665	100.89
3664	100.96
3663	100.94
3662	100.87
3661	100.73
3660	100.56
3659	100.46
3658	100.49
3657	100.57
3656	100.48
3655	100.19
3654	99.87
3653	99.6
3652	99.31
3651	99.09
3650	99.17
3649	99.42
3648	99.57
3647	99.67
3646	99.89
3645	100.23
3644	100.57
3643	100.79
3642	100.87
3641	100.86
3640	100.83
3639	100.79
3638	100.73
3637	100.65
3636	100.6
3635	100.53
3634	100.36
3633	100.07
3632	99.8
3631	99.74
3630	99.98
3629	100.31
3628	100.32
3627	100.24
3626	100.41
3625	100.66
3624	100.71
3623	100.55
3622	100.35
3621	100.25
3620	100.24
3619	100.2
3618	100.08
3617	99.98
3616	100.02
3615	100.15
3614	100.26
3613	100.26
3612	100.23
3611	100.27
3610	100.42
3609	100.61
3608	100.72
3607	100.74
3606	100.74
3605	100.77
3604	100.8
3603	100.8
3602	100.76
3601	100.7
3600	100.63
3599	100.57
3598	100.54
3597	100.55
3596	100.59
3595	100.65
3594	100.67
3593	100.62
3592	100.53
3591	100.44
3590	100.36
3589	100.37
3588	100.48
3587	100.56
3586	100.58
3585	100.65
3584	100.81
3583	100.96
3582	101.03
3581	101.05
3580	101.05
3579	101.03
3578	101.02
3577	101.02
3576	101.03
3575	101.05
3574	101.03
3573	100.95
3572	100.79
3571	100.56
3570	100.33
3569	100.17
3568	100.19
3567	100.31
3566	100.39
3565	100.47
3564	100.62
3563	100.8
3562	100.94
3561	101.04
3560	101.1
3559	101.14
3558	101.15
3557	101.13
3556	101.08
3555	101.04
3554	101.01
3553	101.01
3552	100.98
3551	100.91
3550	100.85
3549	100.81
3548	100.8
3547	100.82
3546	100.87
3545	100.94
3544	101.03
3543	101.11
3542	101.18
3541	101.21
3540	101.22
3539	101.21
3538	101.2
3537	101.21
3536	101.22
3535	101.23
3534	101.22
3533	101.2
3532	101.17
3531	101.12
3530	101.07
3529	101.03
3528	101
3527	100.96
3526	100.96
3525	101
3524	101.08
3523	101.15
3522	101.2
3521	101.23
3520	101.28
3519	101.32
3518	101.34
3517	101.35
3516	101.35
3515	101.34
3514	101.32
3513	101.28
3512	101.26
3511	101.25
3510	101.27
3509	101.26
3508	101.23
3507	101.19
3506	101.16
3505	101.14
3504	101.14
3503	101.17
3502	101.21
3501	101.25
3500	101.3
3499	101.34
3498	101.36
3497	101.37
3496	101.37
3495	101.39
3494	101.4
3493	101.42
3492	101.43
3491	101.43
3490	101.42
3489	101.41
3488	101.4
3487	101.39
3486	101.37
3485	101.35
3484	101.34
3483	101.34
3482	101.35
3481	101.37
3480	101.39
3479	101.43
3478	101.47
3477	101.49
3476	101.5
3475	101.5
3474	101.5
3473	101.49
3472	101.48
3471	101.47
3470	101.46
3469	101.46
3468	101.46
3467	101.47
3466	101.48
3465	101.48
3464	101.49
3463	101.49
3462	101.49
3461	101.5
3460	101.52
3459	101.55
3458	101.58
3457	101.6
3456	101.61
3455	101.61
3454	101.6
3453	101.6
3452	101.57
3451	101.54
3450	101.5
3449	101.47
3448	101.47
3447	101.46
3446	101.47
3445	101.48
3444	101.52
3443	101.56
3442	101.58
3441	101.58
3440	101.58
3439	101.58
3438	101.59
3437	101.59
3436	101.59
3435	101.59
3434	101.59
3433	101.59
3432	101.59
3431	101.6
3430	101.62
3429	101.63
3428	101.65
3427	101.65
3426	101.65
3425	101.63
3424	101.62
3423	101.61
3422	101.6
3421	101.61
3420	101.63
3419	101.65
3418	101.67
3417	101.69
3416	101.7
3415	101.69
3414	101.68
3413	101.67
3412	101.66
3411	101.67
3410	101.67
3409	101.68
3408	101.69
3407	101.7
3406	101.71
3405	101.71
3404	101.69
3403	101.68
3402	101.66
3401	101.66
3400	101.67
3399	101.68
3398	101.69
3397	101.69
3396	101.68
3395	101.67
3394	101.67
3393	101.69
3392	101.7
3391	101.72
3390	101.73
3389	101.75
3388	101.76
3387	101.76
3386	101.76
3385	101.76
3384	101.76
3383	101.76
3382	101.76
3381	101.76
3380	101.76
3379	101.76
3378	101.77
3377	101.77
3376	101.77
3375	101.78
3374	101.78
3373	101.77
3372	101.75
3371	101.74
3370	101.73
3369	101.72
3368	101.73
3367	101.74
3366	101.75
3365	101.76
3364	101.77
3363	101.77
3362	101.78
3361	101.79
3360	101.8
3359	101.81
3358	101.81
3357	101.82
3356	101.82
3355	101.82
3354	101.81
3353	101.79
3352	101.79
3351	101.8
3350	101.81
3349	101.83
3348	101.84
3347	101.85
3346	101.84
3345	101.84
3344	101.84
3343	101.84
3342	101.84
3341	101.84
3340	101.83
3339	101.82
3338	101.83
3337	101.84
3336	101.85
3335	101.86
3334	101.87
3333	101.88
3332	101.89
3331	101.88
3330	101.87
3329	101.85
3328	101.84
3327	101.83
3326	101.84
3325	101.85
3324	101.87
3323	101.89
3322	101.9
3321	101.91
3320	101.91
3319	101.91
3318	101.9
3317	101.89
3316	101.88
3315	101.87
3314	101.86
3313	101.85
3312	101.83
3311	101.82
3310	101.81
3309	101.81
3308	101.82
3307	101.83
3306	101.84
3305	101.86
3304	101.88
3303	101.9
3302	101.9
3301	101.9
3300	101.89
3299	101.88
3298	101.87
3297	101.85
3296	101.84
3295	101.84
3294	101.84
3293	101.84
3292	101.85
3291	101.86
3290	101.88
3289	101.9
3288	101.91
3287	101.92
3286	101.93
3285	101.93
3284	101.94
3283	101.93
3282	101.93
3281	101.92
3280	101.91
3279	101.9
3278	101.89
3277	101.87
3276	101.86
3275	101.85
3274	101.85
3273	101.85
3272	101.85
3271	101.86
3270	101.87
3269	101.89
3268	101.89
3267	101.9
3266	101.9
3265	101.9
3264	101.89
3263	101.89
3262	101.89
3261	101.89
3260	101.88
3259	101.88
3258	101.87
3257	101.85
3256	101.85
3255	101.85
3254	101.86
3253	101.87
3252	101.87
3251	101.87
3250	101.85
3249	101.82
3248	101.79
3247	101.78
3246	101.78
3245	101.8
3244	101.81
3243	101.83
3242	101.85
3241	101.85
3240	101.85
3239	101.84
3238	101.83
3237	101.81
3236	101.8
3235	101.79
3234	101.79
3233	101.79
3232	101.79
3231	101.8
3230	101.8
3229	101.8
3228	101.81
3227	101.81
3226	101.81
3225	101.81
3224	101.81
3223	101.81
3222	101.8
3221	101.8
3220	101.8
3219	101.8
3218	101.79
3217	101.78
3216	101.78
3215	101.78
3214	101.78
3213	101.78
3212	101.78
3211	101.79
3210	101.8
3209	101.8
3208	101.79
3207	101.79
3206	101.78
3205	101.78
3204	101.77
3203	101.77
3202	101.76
3201	101.76
3200	101.76
3199	101.75
3198	101.75
3197	101.75
3196	101.75
3195	101.75
3194	101.76
3193	101.76
3192	101.76
3191	101.76
3190	101.75
3189	101.75
3188	101.75
3187	101.75
3186	101.74
3185	101.73
3184	101.73
3183	101.72
3182	101.72
3181	101.72
3180	101.72
3179	101.72
3178	101.72
3177	101.71
3176	101.71
3175	101.72
3174	101.72
3173	101.71
3172	101.71
3171	101.7
3170	101.7
3169	101.7
3168	101.7
3167	101.69
3166	101.69
3165	101.69
3164	101.68
3163	101.68
3162	101.67
3161	101.66
3160	101.66
3159	101.65
3158	101.64
3157	101.63
3156	101.61
3155	101.59
3154	101.57
3153	101.57
3152	101.58
3151	101.6
3150	101.61
3149	101.62
3148	101.62
3147	101.62
3146	101.62
3145	101.62
3144	101.6
3143	101.59
3142	101.56
3141	101.55
3140	101.54
3139	101.54
3138	101.55
3137	101.56
3136	101.56
3135	101.56
3134	101.55
3133	101.54
3132	101.53
3131	101.53
3130	101.53
3129	101.53
3128	101.54
3127	101.53
3126	101.52
3125	101.5
3124	101.49
3123	101.47
3122	101.46
3121	101.45
3120	101.44
3119	101.43
3118	101.43
3117	101.43
3116	101.43
3115	101.45
3114	101.46
3113	101.47
3112	101.47
3111	101.47
3110	101.46
3109	101.47
3108	101.49
3107	101.5
3106	101.51
3105	101.52
3104	101.51
3103	101.5
3102	101.48
3101	101.47
3100	101.48
3099	101.49
3098	101.5
3097	101.52
3096	101.53
3095	101.53
3094	101.52
3093	101.51
3092	101.5
3091	101.5
3090	101.49
3089	101.48
3088	101.48
3087	101.48
3086	101.47
3085	101.47
3084	101.47
3083	101.47
3082	101.46
3081	101.46
3080	101.45
3079	101.46
3078	101.47
3077	101.48
3076	101.5
3075	101.5
3074	101.51
3073	101.5
3072	101.5
3071	101.48
3070	101.47
3069	101.45
3068	101.45
3067	101.45
3066	101.45
3065	101.46
3064	101.48
3063	101.49
3062	101.49
3061	101.5
3060	101.49
3059	101.47
3058	101.46
3057	101.45
3056	101.45
3055	101.46
3054	101.46
3053	101.45
3052	101.44
3051	101.43
3050	101.43
3049	101.42
3048	101.42
3047	101.41
3046	101.41
3045	101.41
3044	101.41
3043	101.41
3042	101.41
3041	101.41
3040	101.41
3039	101.41
3038	101.41
3037	101.39
3036	101.37
3035	101.35
3034	101.34
3033	101.34
3032	101.35
3031	101.36
3030	101.37
3029	101.38
3028	101.37
3027	101.36
3026	101.36
3025	101.36
3024	101.36
3023	101.37
3022	101.38
3021	101.38
3020	101.38
3019	101.38
3018	101.38
3017	101.37
3016	101.36
3015	101.35
3014	101.35
3013	101.36
3012	101.36
3011	101.37
3010	101.37
3009	101.38
3008	101.38
3007	101.38
3006	101.38
3005	101.38
3004	101.38
3003	101.38
3002	101.38
3001	101.38
3000	101.37
2999	101.35
2998	101.34
2997	101.33
2996	101.32
2995	101.31
2994	101.31
2993	101.32
2992	101.33
2991	101.34
2990	101.35
2989	101.35
2988	101.34
2987	101.32
2986	101.3
2985	101.28
2984	101.26
2983	101.25
2982	101.23
2981	101.22
2980	101.2
2979	101.18
2978	101.15
2977	101.11
2976	101.06
2975	101.02
2974	100.97
2973	100.92
2972	100.87
2971	100.81
2970	100.73
2969	100.65
2968	100.57
2967	100.47
2966	100.38
2965	100.29
2964	100.22
2963	100.17
2962	100.15
2961	100.14
2960	100.13
2959	100.11
2958	100.09
2957	100.05
2956	100
2955	99.94
2954	99.88
2953	99.83
2952	99.8
2951	99.8
2950	99.82
2949	99.87
2948	99.93
2947	100.01
2946	100.1
2945	100.18
2944	100.26
2943	100.32
2942	100.37
2941	100.38
2940	100.38
2939	100.35
2938	100.31
2937	100.26
2936	100.2
2935	100.13
2934	100.04
2933	99.93
2932	99.82
2931	99.69
2930	99.57
2929	99.44
2928	99.33
2927	99.2
2926	99.07
2925	98.94
2924	98.8
2923	98.66
2922	98.52
2921	98.39
2920	98.28
2919	98.2
2918	98.18
2917	98.19
2916	98.25
2915	98.34
2914	98.45
2913	98.57
2912	98.7
2911	98.81
2910	98.92
2909	99.01
2908	99.09
2907	99.16
2906	99.24
2905	99.31
2904	99.38
2903	99.44
2902	99.51
2901	99.57
2900	99.62
2899	99.67
2898	99.71
2897	99.75
2896	99.8
2895	99.84
2894	99.88
2893	99.92
2892	99.94
2891	99.96
2890	99.96
2889	99.97
2888	99.97
2887	99.98
2886	99.99
2885	100.01
2884	100.02
2883	100.02
2882	100.03
2881	100.02
2880	100.02
2879	100.02
2878	100.02
2877	100.02
2876	100.02
2875	100.02
2874	100.02
2873	100.02
2872	100.01
2871	100.01
2870	100
2869	99.98
2868	99.98
2867	99.98
2866	100
2865	100.04
2864	100.08
2863	100.12
2862	100.16
2861	100.18
2860	100.19
2859	100.16
2858	100.11
2857	100.02
2856	99.9
2855	99.75
2854	99.58
2853	99.41
2852	99.27
2851	99.18
2850	99.18
2849	99.23
2848	99.33
2847	99.45
2846	99.55
2845	99.61
2844	99.65
2843	99.67
2842	99.67
2841	99.67
2840	99.67
2839	99.69
2838	99.73
2837	99.8
2836	99.87
2835	99.96
2834	100.05
2833	100.13
2832	100.21
2831	100.28
2830	100.34
2829	100.4
2828	100.44
2827	100.48
2826	100.5
2825	100.52
2824	100.53
2823	100.55
2822	100.57
2821	100.59
2820	100.61
2819	100.62
2818	100.63
2817	100.64
2816	100.65
2815	100.65
2814	100.66
2813	100.66
2812	100.66
2811	100.66
2810	100.67
2809	100.67
2808	100.68
2807	100.69
2806	100.7
2805	100.71
2804	100.72
2803	100.72
2802	100.72
2801	100.72
2800	100.72
2799	100.72
2798	100.73
2797	100.73
2796	100.73
2795	100.73
2794	100.73
2793	100.74
2792	100.74
2791	100.75
2790	100.76
2789	100.77
2788	100.78
2787	100.79
2786	100.8
2785	100.8
2784	100.8
2783	100.8
2782	100.8
2781	100.8
2780	100.81
2779	100.81
2778	100.8
2777	100.8
2776	100.79
2775	100.8
2774	100.8
2773	100.81
2772	100.82
2771	100.82
2770	100.82
2769	100.83
2768	100.82
2767	100.82
2766	100.82
2765	100.82
2764	100.82
2763	100.83
2762	100.83
2761	100.83
2760	100.82
2759	100.81
2758	100.81
2757	100.81
2756	100.82
2755	100.82
2754	100.82
2753	100.82
2752	100.82
2751	100.81
2750	100.81
2749	100.8
2748	100.8
2747	100.8
2746	100.8
2745	100.8
2744	100.8
2743	100.8
2742	100.8
2741	100.8
2740	100.79
2739	100.79
2738	100.79
2737	100.79
2736	100.79
2735	100.79
2734	100.79
2733	100.78
2732	100.78
2731	100.77
2730	100.77
2729	100.77
2728	100.77
2727	100.77
2726	100.76
2725	100.76
2724	100.76
2723	100.76
2722	100.77
2721	100.78
2720	100.78
2719	100.78
2718	100.78
2717	100.77
2716	100.77
2715	100.77
2714	100.77
2713	100.77
2712	100.77
2711	100.77
2710	100.77
2709	100.78
2708	100.79
2707	100.79
2706	100.79
2705	100.79
2704	100.8
2703	100.8
2702	100.8
2701	100.79
2700	100.78
2699	100.78
2698	100.77
2697	100.78
2696	100.78
2695	100.79
2694	100.79
2693	100.79
2692	100.79
2691	100.79
2690	100.79
2689	100.79
2688	100.79
2687	100.79
2686	100.79
2685	100.79
2684	100.79
2683	100.79
2682	100.8
2681	100.8
2680	100.8
2679	100.8
2678	100.79
2677	100.79
2676	100.78
2675	100.78
2674	100.78
2673	100.78
2672	100.78
2671	100.78
2670	100.78
2669	100.78
2668	100.77
2667	100.77
2666	100.76
2665	100.75
2664	100.74
2663	100.72
2662	100.71
2661	100.7
2660	100.69
2659	100.68
2658	100.68
2657	100.67
2656	100.67
2655	100.67
2654	100.66
2653	100.66
2652	100.66
2651	100.66
2650	100.66
2649	100.66
2648	100.66
2647	100.66
2646	100.66
2645	100.66
2644	100.66
2643	100.65
2642	100.65
2641	100.64
2640	100.64
2639	100.64
2638	100.65
2637	100.65
2636	100.65
2635	100.66
2634	100.67
2633	100.67
2632	100.68
2631	100.68
2630	100.67
2629	100.66
2628	100.66
2627	100.67
2626	100.67
2625	100.68
2624	100.68
2623	100.68
2622	100.68
2621	100.69
2620	100.7
2619	100.7
2618	100.7
2617	100.69
2616	100.69
2615	100.69
2614	100.7
2613	100.7
2612	100.71
2611	100.71
2610	100.71
2609	100.7
2608	100.7
2607	100.7
2606	100.7
2605	100.7
2604	100.71
2603	100.71
2602	100.72
2601	100.72
2600	100.72
2599	100.72
2598	100.72
2597	100.72
2596	100.73
2595	100.73
2594	100.74
2593	100.74
2592	100.74
2591	100.73
2590	100.72
2589	100.72
2588	100.73
2587	100.73
2586	100.74
2585	100.74
2584	100.74
2583	100.73
2582	100.73
2581	100.72
2580	100.72
2579	100.71
2578	100.71
2577	100.71
2576	100.71
2575	100.72
2574	100.73
2573	100.73
2572	100.73
2571	100.73
2570	100.74
2569	100.75
2568	100.75
2567	100.76
2566	100.76
2565	100.76
2564	100.76
2563	100.76
2562	100.76
2561	100.76
2560	100.76
2559	100.76
2558	100.76
2557	100.76
2556	100.76
2555	100.76
2554	100.75
2553	100.75
2552	100.74
2551	100.74
2550	100.75
2549	100.75
2548	100.76
2547	100.77
2546	100.78
2545	100.78
2544	100.78
2543	100.79
2542	100.79
2541	100.79
2540	100.79
2539	100.79
2538	100.79
2537	100.79
2536	100.79
2535	100.8
2534	100.8
2533	100.8
2532	100.8
2531	100.8
2530	100.81
2529	100.81
2528	100.81
2527	100.81
2526	100.8
2525	100.79
2524	100.78
2523	100.78
2522	100.78
2521	100.78
2520	100.79
2519	100.8
2518	100.81
2517	100.82
2516	100.82
2515	100.82
2514	100.82
2513	100.82
2512	100.83
2511	100.84
2510	100.84
2509	100.83
2508	100.82
2507	100.82
2506	100.82
2505	100.82
2504	100.82
2503	100.81
2502	100.8
2501	100.8
2500	100.81
2499	100.81
2498	100.8
2497	100.79
2496	100.78
2495	100.79
2494	100.79
2493	100.8
2492	100.81
2491	100.81
2490	100.81
2489	100.81
2488	100.82
2487	100.82
2486	100.82
2485	100.82
2484	100.82
2483	100.82
2482	100.83
2481	100.83
2480	100.83
2479	100.83
2478	100.82
2477	100.82
2476	100.82
2475	100.82
2474	100.82
2473	100.82
2472	100.82
2471	100.82
2470	100.82
2469	100.81
2468	100.81
2467	100.81
2466	100.81
2465	100.81
2464	100.8
2463	100.79
2462	100.79
2461	100.79
2460	100.79
2459	100.79
2458	100.79
2457	100.79
2456	100.78
2455	100.78
2454	100.78
2453	100.78
2452	100.77
2451	100.78
2450	100.78
2449	100.78
2448	100.78
2447	100.78
2446	100.77
2445	100.76
2444	100.76
2443	100.76
2442	100.77
2441	100.78
2440	100.78
2439	100.79
2438	100.79
2437	100.79
2436	100.79
2435	100.78
2434	100.78
2433	100.78
2432	100.79
2431	100.8
2430	100.81
2429	100.82
2428	100.81
2427	100.81
2426	100.82
2425	100.82
2424	100.82
2423	100.82
2422	100.8
2421	100.79
2420	100.78
2419	100.78
2418	100.78
2417	100.79
2416	100.8
2415	100.81
2414	100.82
2413	100.82
2412	100.82
2411	100.81
2410	100.81
2409	100.81
2408	100.81
2407	100.82
2406	100.82
2405	100.82
2404	100.82
2403	100.82
2402	100.82
2401	100.82
2400	100.82
2399	100.82
2398	100.83
2397	100.84
2396	100.85
2395	100.85
2394	100.84
2393	100.83
2392	100.82
2391	100.8
2390	100.8
2389	100.8
2388	100.8
2387	100.81
2386	100.81
2385	100.8
2384	100.8
2383	100.81
2382	100.83
2381	100.84
2380	100.84
2379	100.84
2378	100.84
2377	100.85
2376	100.87
2375	100.88
2374	100.88
2373	100.89
2372	100.89
2371	100.89
2370	100.88
2369	100.87
2368	100.85
2367	100.85
2366	100.85
2365	100.86
2364	100.87
2363	100.88
2362	100.9
2361	100.91
2360	100.94
2359	101.01
2358	101.11
2357	101.19
2356	101.27
2355	101.35
2354	101.34
2353	101.22
2352	101.04
2351	100.91
2350	100.89
2349	100.94
2348	100.97
2347	100.86
2346	100.67
2345	100.56
2344	100.59
2343	100.67
2342	100.74
2341	100.8
2340	100.85
2339	100.87
2338	100.87
2337	100.87
2336	100.9
2335	100.95
2334	100.99
2333	100.99
2332	100.95
2331	100.9
2330	100.87
2329	100.85
2328	100.83
2327	100.79
2326	100.73
2325	100.66
2324	100.61
2323	100.58
2322	100.58
2321	100.59
2320	100.61
2319	100.62
2318	100.64
2317	100.67
2316	100.69
2315	100.69
2314	100.66
2313	100.62
2312	100.59
2311	100.57
2310	100.56
2309	100.56
2308	100.55
2307	100.54
2306	100.54
2305	100.53
2304	100.52
2303	100.51
2302	100.49
2301	100.48
2300	100.47
2299	100.46
2298	100.46
2297	100.46
2296	100.45
2295	100.45
2294	100.45
2293	100.45
2292	100.44
2291	100.42
2290	100.4
2289	100.39
2288	100.38
2287	100.38
2286	100.38
2285	100.39
2284	100.4
2283	100.4
2282	100.4
2281	100.4
2280	100.4
2279	100.41
2278	100.43
2277	100.46
2276	100.49
2275	100.51
2274	100.53
2273	100.55
2272	100.55
2271	100.54
2270	100.53
2269	100.53
2268	100.54
2267	100.55
2266	100.57
2265	100.58
2264	100.58
2263	100.57
2262	100.55
2261	100.53
2260	100.53
2259	100.52
2258	100.53
2257	100.53
2256	100.54
2255	100.53
2254	100.52
2253	100.52
2252	100.53
2251	100.54
2250	100.53
2249	100.52
2248	100.51
2247	100.52
2246	100.53
2245	100.55
2244	100.57
2243	100.58
2242	100.59
2241	100.6
2240	100.59
2239	100.59
2238	100.6
2237	100.6
2236	100.6
2235	100.58
2234	100.55
2233	100.52
2232	100.5
2231	100.49
2230	100.49
2229	100.5
2228	100.53
2227	100.57
2226	100.61
2225	100.64
2224	100.63
2223	100.57
2222	100.5
2221	100.44
2220	100.41
2219	100.42
2218	100.46
2217	100.5
2216	100.53
2215	100.56
2214	100.58
2213	100.59
2212	100.58
2211	100.55
2210	100.51
2209	100.48
2208	100.45
2207	100.44
2206	100.46
2205	100.48
2204	100.49
2203	100.5
2202	100.52
2201	100.54
2200	100.55
2199	100.55
2198	100.53
2197	100.51
2196	100.47
2195	100.43
2194	100.38
2193	100.35
2192	100.35
2191	100.36
2190	100.39
2189	100.39
2188	100.36
2187	100.31
2186	100.28
2185	100.28
2184	100.32
2183	100.4
2182	100.48
2181	100.53
2180	100.52
2179	100.47
2178	100.43
2177	100.44
2176	100.48
2175	100.51
2174	100.49
2173	100.45
2172	100.4
2171	100.35
2170	100.31
2169	100.29
2168	100.27
2167	100.27
2166	100.26
2165	100.23
2164	100.15
2163	100.04
2162	99.98
2161	100.06
2160	100.3
2159	100.64
2158	100.95
2157	101.14
2156	101.18
2155	101.12
2154	101.04
2153	100.95
2152	100.89
2151	100.86
2150	100.88
2149	100.91
2148	100.91
2147	100.9
2146	100.9
2145	100.9
2144	100.88
2143	100.83
2142	100.77
2141	100.73
2140	100.72
2139	100.76
2138	100.85
2137	100.93
2136	100.99
2135	101.01
2134	101.01
2133	101
2132	100.96
2131	100.92
2130	100.9
2129	100.89
2128	100.88
2127	100.86
2126	100.83
2125	100.79
2124	100.75
2123	100.7
2122	100.66
2121	100.64
2120	100.63
2119	100.62
2118	100.61
2117	100.6
2116	100.59
2115	100.59
2114	100.58
2113	100.58
2112	100.57
2111	100.56
2110	100.55
2109	100.55
2108	100.56
2107	100.57
2106	100.58
2105	100.56
2104	100.53
2103	100.5
2102	100.49
2101	100.5
2100	100.5
2099	100.49
2098	100.49
2097	100.53
2096	100.59
2095	100.64
2094	100.68
2093	100.68
2092	100.65
2091	100.61
2090	100.58
2089	100.58
2088	100.58
2087	100.57
2086	100.54
2085	100.51
2084	100.48
2083	100.47
2082	100.47
2081	100.49
2080	100.5
2079	100.49
2078	100.48
2077	100.47
2076	100.45
2075	100.44
2074	100.43
2073	100.42
2072	100.41
2071	100.41
2070	100.41
2069	100.42
2068	100.43
2067	100.42
2066	100.4
2065	100.38
2064	100.37
2063	100.37
2062	100.41
2061	100.46
2060	100.49
2059	100.49
2058	100.47
2057	100.45
2056	100.43
2055	100.39
2054	100.32
2053	100.23
2052	100.12
2051	100.05
2050	100.05
2049	100.12
2048	100.2
2047	100.24
2046	100.27
2045	100.29
2044	100.3
2043	100.26
2042	100.21
2041	100.18
2040	100.16
2039	100.13
2038	100.08
2037	100.03
2036	100.02
2035	100.06
2034	100.17
2033	100.31
2032	100.42
2031	100.48
2030	100.47
2029	100.42
2028	100.35
2027	100.28
2026	100.25
2025	100.26
2024	100.25
2023	100.21
2022	100.18
2021	100.17
2020	100.19
2019	100.2
2018	100.25
2017	100.33
2016	100.42
2015	100.47
2014	100.49
2013	100.5
2012	100.49
2011	100.46
2010	100.44
2009	100.46
2008	100.51
2007	100.57
2006	100.6
2005	100.61
2004	100.6
2003	100.56
[truncated: 1,603 more rows]

## Sheet: Polyethylenimine
Created as New Dataset	Sample 011 By Administrator Date Monday	June 27 2022
cm-1	%T
4000	100.07
3999	100.07
3998	100.06
3997	100.05
3996	100.04
3995	100.02
3994	100.01
3993	100
3992	100.02
3991	100.04
3990	100.06
3989	100.06
3988	100.07
3987	100.07
3986	100.07
3985	100.06
3984	100.06
3983	100.05
3982	100.04
3981	100.03
3980	100.01
3979	99.99
3978	99.97
3977	99.96
3976	99.96
3975	99.96
3974	99.95
3973	99.95
3972	99.96
3971	99.98
3970	100
3969	100.03
3968	100.04
3967	100.02
3966	99.99
3965	99.96
3964	99.94
3963	99.93
3962	99.94
3961	99.94
3960	99.95
3959	99.97
3958	99.98
3957	99.99
3956	99.97
3955	99.93
3954	99.86
3953	99.77
3952	99.67
3951	99.61
3950	99.6
3949	99.62
3948	99.63
3947	99.61
3946	99.61
3945	99.66
3944	99.73
3943	99.77
3942	99.77
3941	99.78
3940	99.85
3939	99.94
3938	99.94
3937	99.84
3936	99.69
3935	99.58
3934	99.53
3933	99.54
3932	99.57
3931	99.59
3930	99.57
3929	99.52
3928	99.49
3927	99.5
3926	99.53
3925	99.5
3924	99.42
3923	99.36
3922	99.37
3921	99.41
3920	99.44
3919	99.52
3918	99.67
3917	99.8
3916	99.87
3915	99.91
3914	99.99
3913	100.09
3912	100.12
3911	100.04
3910	99.84
3909	99.55
3908	99.22
3907	98.91
3906	98.67
3905	98.53
3904	98.44
3903	98.45
3902	98.65
3901	99.04
3900	99.38
3899	99.52
3898	99.48
3897	99.42
3896	99.37
3895	99.31
3894	99.31
3893	99.43
3892	99.57
3891	99.44
3890	99.12
3889	99
3888	99.2
3887	99.45
3886	99.45
3885	99.09
3884	98.71
3883	98.72
3882	99.07
3881	99.42
3880	99.47
3879	99.25
3878	99.14
3877	99.23
3876	99.28
3875	99.07
3874	98.62
3873	98.27
3872	98.35
3871	98.72
3870	98.88
3869	98.62
3868	98.41
3867	98.59
3866	98.89
3865	99.04
3864	99.06
3863	99.08
3862	99.17
3861	99.23
3860	99.15
3859	98.9
3858	98.52
3857	98.08
3856	97.75
3855	97.82
3854	98.3
3853	98.36
3852	97.81
3851	97.75
3850	98.37
3849	99.02
3848	99.38
3847	99.46
3846	99.38
3845	99.18
3844	98.87
3843	98.45
3842	98.07
3841	97.89
3840	97.97
3839	98.16
3838	98.26
3837	98.21
3836	98.2
3835	98.42
3834	98.82
3833	99.21
3832	99.4
3831	99.37
3830	99.28
3829	99.31
3828	99.38
3827	99.3
3826	98.94
3825	98.51
3824	98.31
3823	98.42
3822	98.64
3821	98.54
3820	98.11
3819	98.04
3818	98.59
3817	99.25
3816	99.48
3815	99.26
3814	99.13
3813	99.34
3812	99.55
3811	99.52
3810	99.39
3809	99.39
3808	99.45
3807	99.23
3806	98.65
3805	98.22
3804	98.29
3803	98.66
3802	98.91
3801	98.66
3800	98.23
3799	98.31
3798	98.88
3797	99.42
3796	99.68
3795	99.75
3794	99.86
3793	100.03
3792	100.14
3791	100.14
3790	100.05
3789	99.92
3788	99.79
3787	99.72
3786	99.69
3785	99.64
3784	99.5
3783	99.37
3782	99.37
3781	99.51
3780	99.65
3779	99.7
3778	99.69
3777	99.76
3776	99.88
3775	99.87
3774	99.69
3773	99.51
3772	99.46
3771	99.48
3770	99.43
3769	99.28
3768	99.25
3767	99.44
3766	99.64
3765	99.61
3764	99.42
3763	99.28
3762	99.24
3761	99.2
3760	99.12
3759	99.02
3758	98.89
3757	98.69
3756	98.48
3755	98.23
3754	97.9
3753	97.56
3752	97.49
3751	97.68
3750	97.66
3749	97.35
3748	97.27
3747	97.71
3746	98.51
3745	99.13
3744	98.93
3743	98.23
3742	98
3741	98.21
3740	98.27
3739	98.04
3738	97.71
3737	97.55
3736	97.6
3735	97.83
3734	98.21
3733	98.67
3732	98.97
3731	99.03
3730	99.04
3729	99.15
3728	99.25
3727	99.22
3726	99.09
3725	99
3724	99.05
3723	99.16
3722	99.26
3721	99.32
3720	99.41
3719	99.51
3718	99.49
3717	99.3
3716	99.01
3715	98.73
3714	98.5
3713	98.39
3712	98.47
3711	98.62
3710	98.73
3709	98.88
3708	99.09
3707	99.23
3706	99.26
3705	99.21
3704	99.18
3703	99.19
3702	99.19
3701	99.1
3700	98.99
3699	99
3698	99.08
3697	99.07
3696	98.9
3695	98.62
3694	98.31
3693	97.95
3692	97.64
3691	97.6
3690	97.93
3689	98.28
3688	98.36
3687	98.39
3686	98.67
3685	99.07
3684	99.32
3683	99.32
3682	99.15
3681	98.84
3680	98.34
3679	97.77
3678	97.44
3677	97.57
3676	97.91
3675	97.77
3674	97.32
3673	97.38
3672	97.9
3671	98.4
3670	98.65
3669	98.6
3668	98.6
3667	98.92
3666	99.32
3665	99.56
3664	99.62
3663	99.59
3662	99.45
3661	99.22
3660	98.98
3659	98.86
3658	98.92
3657	98.99
3656	98.8
3655	98.33
3654	97.89
3653	97.51
3652	97.08
3651	96.7
3650	96.73
3649	97.07
3648	97.34
3647	97.54
3646	97.86
3645	98.32
3644	98.75
3643	99.02
3642	99.11
3641	99.09
3640	99.06
3639	99.02
3638	98.92
3637	98.81
3636	98.74
3635	98.62
3634	98.34
3633	97.93
3632	97.62
3631	97.58
3630	97.89
3629	98.23
3628	98.14
3627	97.94
3626	98.1
3625	98.35
3624	98.34
3623	98.1
3622	97.83
3621	97.67
3620	97.64
3619	97.58
3618	97.41
3617	97.29
3616	97.37
3615	97.54
3614	97.68
3613	97.72
3612	97.74
3611	97.85
3610	98.08
3609	98.3
3608	98.4
3607	98.38
3606	98.35
3605	98.36
3604	98.35
3603	98.28
3602	98.18
3601	98.06
3600	97.93
3599	97.84
3598	97.81
3597	97.84
3596	97.92
3595	98
3594	98.01
3593	97.93
3592	97.82
3591	97.69
3590	97.58
3589	97.56
3588	97.65
3587	97.72
3586	97.75
3585	97.85
3584	98.05
3583	98.22
3582	98.29
3581	98.31
3580	98.29
3579	98.26
3578	98.23
3577	98.21
3576	98.21
3575	98.21
3574	98.17
3573	98.04
3572	97.8
3571	97.47
3570	97.13
3569	96.88
3568	96.84
3567	96.93
3566	97.02
3565	97.13
3564	97.34
3563	97.57
3562	97.75
3561	97.87
3560	97.95
3559	97.99
3558	97.99
3557	97.94
3556	97.86
3555	97.76
3554	97.7
3553	97.66
3552	97.6
3551	97.51
3550	97.43
3549	97.36
3548	97.3
3547	97.28
3546	97.31
3545	97.38
3544	97.48
3543	97.6
3542	97.7
3541	97.76
3540	97.75
3539	97.71
3538	97.67
3537	97.65
3536	97.64
3535	97.63
3534	97.61
3533	97.56
3532	97.48
3531	97.37
3530	97.26
3529	97.17
3528	97.09
3527	97.02
3526	97
3525	97.04
3524	97.12
3523	97.2
3522	97.26
3521	97.31
3520	97.36
3519	97.4
3518	97.41
3517	97.39
3516	97.36
3515	97.33
3514	97.27
3513	97.2
3512	97.15
3511	97.12
3510	97.11
3509	97.08
3508	97.03
3507	96.95
3506	96.88
3505	96.81
3504	96.78
3503	96.79
3502	96.83
3501	96.88
3500	96.93
3499	96.95
3498	96.95
3497	96.93
3496	96.92
3495	96.92
3494	96.93
3493	96.94
3492	96.93
3491	96.9
3490	96.86
3489	96.82
3488	96.78
3487	96.74
3486	96.69
3485	96.66
3484	96.62
3483	96.59
3482	96.57
3481	96.56
3480	96.59
3479	96.62
3478	96.66
3477	96.67
3476	96.66
3475	96.64
3474	96.61
3473	96.58
3472	96.55
3471	96.52
3470	96.48
3469	96.46
3468	96.44
3467	96.43
3466	96.41
3465	96.39
3464	96.36
3463	96.34
3462	96.33
3461	96.32
3460	96.33
3459	96.35
3458	96.38
3457	96.39
3456	96.39
3455	96.37
3454	96.35
3453	96.31
3452	96.26
3451	96.19
3450	96.11
3449	96.05
3448	96.01
3447	95.98
3446	95.97
3445	95.99
3444	96.03
3443	96.06
3442	96.07
3441	96.06
3440	96.04
3439	96.03
3438	96.01
3437	95.99
3436	95.98
3435	95.97
3434	95.96
3433	95.95
3432	95.93
3431	95.92
3430	95.92
3429	95.92
3428	95.92
3427	95.92
3426	95.9
3425	95.86
3424	95.82
3423	95.79
3422	95.76
3421	95.75
3420	95.75
3419	95.77
3418	95.79
3417	95.8
3416	95.8
3415	95.78
3414	95.76
3413	95.74
3412	95.72
3411	95.71
3410	95.7
3409	95.69
3408	95.68
3407	95.68
3406	95.66
3405	95.64
3404	95.61
3403	95.57
3402	95.55
3401	95.53
3400	95.53
3399	95.53
3398	95.53
3397	95.51
3396	95.48
3395	95.46
3394	95.45
3393	95.45
3392	95.46
3391	95.47
3390	95.49
3389	95.51
3388	95.52
3387	95.51
3386	95.5
3385	95.49
3384	95.48
3383	95.47
3382	95.46
3381	95.45
3380	95.44
3379	95.43
3378	95.42
3377	95.42
3376	95.41
3375	95.41
3374	95.39
3373	95.36
3372	95.32
3371	95.28
3370	95.25
3369	95.22
3368	95.21
3367	95.21
3366	95.21
3365	95.21
3364	95.21
3363	95.21
3362	95.21
3361	95.21
3360	95.21
3359	95.22
3358	95.22
3357	95.21
3356	95.2
3355	95.19
3354	95.16
3353	95.14
3352	95.12
3351	95.12
3350	95.12
3349	95.13
3348	95.14
3347	95.13
3346	95.11
3345	95.08
3344	95.07
3343	95.05
3342	95.04
3341	95.03
3340	95.01
3339	95
3338	95.01
3337	95.02
3336	95.03
3335	95.05
3334	95.07
3333	95.08
3332	95.08
3331	95.07
3330	95.06
3329	95.03
3328	95.01
3327	95
3326	95
3325	95
3324	95.02
3323	95.04
3322	95.05
3321	95.05
3320	95.05
3319	95.05
3318	95.04
3317	95.02
3316	95.01
3315	94.99
3314	94.96
3313	94.93
3312	94.9
3311	94.87
3310	94.85
3309	94.84
3308	94.84
3307	94.84
3306	94.86
3305	94.87
3304	94.89
3303	94.89
3302	94.89
3301	94.87
3300	94.85
3299	94.83
3298	94.81
3297	94.79
3296	94.77
3295	94.76
3294	94.74
3293	94.74
3292	94.74
3291	94.75
3290	94.77
3289	94.8
3288	94.81
3287	94.82
3286	94.82
3285	94.82
3284	94.82
3283	94.82
3282	94.81
3281	94.8
3280	94.79
3279	94.79
3278	94.78
3277	94.77
3276	94.77
3275	94.77
3274	94.78
3273	94.79
3272	94.81
3271	94.84
3270	94.87
3269	94.9
3268	94.93
3267	94.96
3266	94.98
3265	94.99
3264	95.01
3263	95.03
3262	95.04
3261	95.06
3260	95.08
3259	95.09
3258	95.09
3257	95.1
3256	95.11
3255	95.14
3254	95.18
3253	95.22
3252	95.25
3251	95.27
3250	95.28
3249	95.28
3248	95.27
3247	95.27
3246	95.29
3245	95.33
3244	95.37
3243	95.41
3242	95.44
3241	95.47
3240	95.48
3239	95.49
3238	95.49
3237	95.5
3236	95.5
3235	95.51
3234	95.52
3233	95.55
3232	95.57
3231	95.6
3230	95.63
3229	95.66
3228	95.69
3227	95.71
3226	95.73
3225	95.75
3224	95.76
3223	95.77
3222	95.77
3221	95.77
3220	95.78
3219	95.79
3218	95.8
3217	95.81
3216	95.82
3215	95.84
3214	95.85
3213	95.88
3212	95.91
3211	95.94
3210	95.96
3209	95.98
3208	96
3207	96.01
3206	96.03
3205	96.04
3204	96.05
3203	96.06
3202	96.07
3201	96.08
3200	96.09
3199	96.1
3198	96.12
3197	96.14
3196	96.17
3195	96.19
3194	96.22
3193	96.23
3192	96.25
3191	96.26
3190	96.27
3189	96.29
3188	96.31
3187	96.32
3186	96.34
3185	96.35
3184	96.37
3183	96.38
3182	96.39
3181	96.4
3180	96.42
3179	96.44
3178	96.46
3177	96.49
3176	96.51
3175	96.54
3174	96.57
3173	96.58
3172	96.59
3171	96.61
3170	96.62
3169	96.64
3168	96.65
3167	96.67
3166	96.69
3165	96.71
3164	96.73
3163	96.74
3162	96.75
3161	96.77
3160	96.78
3159	96.8
3158	96.8
3157	96.8
3156	96.8
3155	96.8
3154	96.8
3153	96.82
3152	96.85
3151	96.89
3150	96.93
3149	96.96
3148	96.99
3147	97.01
3146	97.03
3145	97.04
3144	97.04
3143	97.04
3142	97.03
3141	97.03
3140	97.03
3139	97.05
3138	97.08
3137	97.11
3136	97.14
3135	97.16
3134	97.17
3133	97.19
3132	97.19
3131	97.2
3130	97.21
3129	97.23
3128	97.24
3127	97.25
3126	97.24
3125	97.24
3124	97.23
3123	97.23
3122	97.22
3121	97.22
3120	97.23
3119	97.23
3118	97.24
3117	97.26
3116	97.29
3115	97.33
3114	97.36
3113	97.39
3112	97.41
3111	97.41
3110	97.41
3109	97.42
3108	97.45
3107	97.47
3106	97.5
3105	97.51
3104	97.5
3103	97.49
3102	97.48
3101	97.48
3100	97.49
3099	97.51
3098	97.54
3097	97.56
3096	97.58
3095	97.59
3094	97.59
3093	97.59
3092	97.6
3091	97.6
3090	97.6
3089	97.6
3088	97.61
3087	97.62
3086	97.62
3085	97.61
3084	97.61
3083	97.61
3082	97.61
3081	97.61
3080	97.62
3079	97.64
3078	97.67
3077	97.7
3076	97.73
3075	97.75
3074	97.77
3073	97.77
3072	97.77
3071	97.77
3070	97.76
3069	97.75
3068	97.74
3067	97.75
3066	97.77
3065	97.79
3064	97.82
3063	97.86
3062	97.89
3061	97.91
3060	97.92
3059	97.91
3058	97.91
3057	97.92
3056	97.93
3055	97.95
3054	97.96
3053	97.97
3052	97.98
3051	97.98
3050	98
3049	98.02
3048	98.04
3047	98.05
3046	98.07
3045	98.08
3044	98.09
3043	98.11
3042	98.12
3041	98.14
3040	98.16
3039	98.18
3038	98.18
3037	98.17
3036	98.16
3035	98.14
3034	98.14
3033	98.15
3032	98.17
3031	98.2
3030	98.24
3029	98.27
3028	98.28
3027	98.29
3026	98.29
3025	98.29
3024	98.31
3023	98.34
3022	98.35
3021	98.36
3020	98.37
3019	98.37
3018	98.37
3017	98.38
3016	98.37
3015	98.37
3014	98.37
3013	98.38
3012	98.4
3011	98.43
3010	98.46
3009	98.48
3008	98.49
3007	98.49
3006	98.49
3005	98.49
3004	98.49
3003	98.49
3002	98.5
3001	98.5
3000	98.49
2999	98.48
2998	98.47
2997	98.46
2996	98.46
2995	98.45
2994	98.45
2993	98.45
2992	98.46
2991	98.46
2990	98.47
2989	98.46
2988	98.45
2987	98.43
2986	98.41
2985	98.38
2984	98.35
2983	98.33
2982	98.3
2981	98.27
2980	98.24
2979	98.22
2978	98.2
2977	98.16
2976	98.11
2975	98.07
2974	98.04
2973	98.01
2972	97.99
2971	97.96
2970	97.92
2969	97.87
2968	97.83
2967	97.78
2966	97.73
2965	97.68
2964	97.63
2963	97.6
2962	97.56
2961	97.53
2960	97.51
2959	97.48
2958	97.45
2957	97.42
2956	97.38
2955	97.35
2954	97.31
2953	97.28
2952	97.25
2951	97.22
2950	97.18
2949	97.13
2948	97.07
2947	97.01
2946	96.95
2945	96.88
2944	96.82
2943	96.76
2942	96.7
2941	96.63
2940	96.55
2939	96.47
2938	96.37
2937	96.28
2936	96.18
2935	96.08
2934	95.98
2933	95.87
2932	95.76
2931	95.65
2930	95.55
2929	95.46
2928	95.38
2927	95.29
2926	95.19
2925	95.08
2924	94.96
2923	94.83
2922	94.71
2921	94.58
2920	94.48
2919	94.42
2918	94.42
2917	94.49
2916	94.63
2915	94.83
2914	95.07
2913	95.32
2912	95.56
2911	95.78
2910	95.96
2909	96.12
2908	96.25
2907	96.36
2906	96.46
2905	96.54
2904	96.62
2903	96.69
2902	96.76
2901	96.83
2900	96.89
2899	96.95
2898	97
2897	97.05
2896	97.11
2895	97.17
2894	97.23
2893	97.29
2892	97.35
2891	97.4
2890	97.44
2889	97.48
2888	97.51
2887	97.55
2886	97.59
2885	97.63
2884	97.66
2883	97.69
2882	97.71
2881	97.73
2880	97.74
2879	97.74
2878	97.74
2877	97.73
2876	97.71
2875	97.69
2874	97.67
2873	97.66
2872	97.66
2871	97.65
2870	97.65
2869	97.63
2868	97.61
2867	97.59
2866	97.56
2865	97.52
2864	97.47
2863	97.42
2862	97.36
2861	97.3
2860	97.22
2859	97.13
2858	97.02
2857	96.89
2856	96.74
2855	96.57
2854	96.39
2853	96.23
2852	96.1
2851	96.06
2850	96.12
2849	96.28
2848	96.51
2847	96.78
2846	97.04
2845	97.29
2844	97.5
2843	97.68
2842	97.83
2841	97.96
2840	98.07
2839	98.16
2838	98.25
2837	98.33
2836	98.4
2835	98.46
2834	98.52
2833	98.58
2832	98.63
2831	98.68
2830	98.72
2829	98.76
2828	98.79
2827	98.81
2826	98.83
2825	98.85
2824	98.87
2823	98.89
2822	98.91
2821	98.93
2820	98.95
2819	98.97
2818	98.98
2817	99
2816	99.01
2815	99.02
2814	99.03
2813	99.04
2812	99.05
2811	99.05
2810	99.06
2809	99.08
2808	99.1
2807	99.12
2806	99.13
2805	99.14
2804	99.15
2803	99.15
2802	99.16
2801	99.17
2800	99.17
2799	99.17
2798	99.17
2797	99.18
2796	99.19
2795	99.2
2794	99.21
2793	99.22
2792	99.22
2791	99.23
2790	99.24
2789	99.26
2788	99.27
2787	99.29
2786	99.3
2785	99.31
2784	99.31
2783	99.32
2782	99.33
2781	99.34
2780	99.35
2779	99.36
2778	99.36
2777	99.37
2776	99.37
2775	99.37
2774	99.38
2773	99.39
2772	99.4
2771	99.41
2770	99.41
2769	99.42
2768	99.42
2767	99.43
2766	99.43
2765	99.44
2764	99.45
2763	99.46
2762	99.47
2761	99.47
2760	99.48
2759	99.49
2758	99.49
2757	99.5
2756	99.5
2755	99.5
2754	99.5
2753	99.5
2752	99.5
2751	99.49
2750	99.49
2749	99.49
2748	99.49
2747	99.5
2746	99.51
2745	99.52
2744	99.53
2743	99.53
2742	99.54
2741	99.55
2740	99.55
2739	99.55
2738	99.55
2737	99.55
2736	99.56
2735	99.56
2734	99.57
2733	99.57
2732	99.58
2731	99.58
2730	99.59
2729	99.59
2728	99.58
2727	99.58
2726	99.58
2725	99.59
2724	99.6
2723	99.61
2722	99.62
2721	99.63
2720	99.63
2719	99.63
2718	99.64
2717	99.64
2716	99.64
2715	99.64
2714	99.65
2713	99.65
2712	99.65
2711	99.66
2710	99.67
2709	99.67
2708	99.68
2707	99.69
2706	99.7
2705	99.7
2704	99.71
2703	99.71
2702	99.7
2701	99.7
2700	99.7
2699	99.7
2698	99.7
2697	99.71
2696	99.71
2695	99.72
2694	99.72
2693	99.73
2692	99.73
2691	99.74
2690	99.74
2689	99.74
2688	99.74
2687	99.74
2686	99.75
2685	99.75
2684	99.75
2683	99.75
2682	99.76
2681	99.76
2680	99.77
2679	99.77
2678	99.77
2677	99.76
2676	99.76
2675	99.76
2674	99.76
2673	99.76
2672	99.76
2671	99.76
2670	99.76
2669	99.76
2668	99.76
2667	99.75
2666	99.74
2665	99.73
2664	99.71
2663	99.69
2662	99.68
2661	99.66
2660	99.65
2659	99.64
2658	99.63
2657	99.63
2656	99.62
2655	99.62
2654	99.62
2653	99.62
2652	99.62
2651	99.62
2650	99.62
2649	99.62
2648	99.62
2647	99.63
2646	99.63
2645	99.63
2644	99.63
2643	99.63
2642	99.63
2641	99.64
2640	99.64
2639	99.64
2638	99.65
2637	99.65
2636	99.65
2635	99.66
2634	99.67
2633	99.67
2632	99.68
2631	99.68
2630	99.68
2629	99.69
2628	99.69
2627	99.7
2626	99.71
2625	99.72
2624	99.73
2623	99.74
2622	99.75
2621	99.76
2620	99.76
2619	99.77
2618	99.77
2617	99.77
2616	99.77
2615	99.77
2614	99.78
2613	99.79
2612	99.8
2611	99.81
2610	99.81
2609	99.81
2608	99.81
2607	99.81
2606	99.82
2605	99.83
2604	99.83
2603	99.84
2602	99.85
2601	99.86
2600	99.86
2599	99.86
2598	99.86
2597	99.86
2596	99.86
2595	99.86
2594	99.88
2593	99.9
2592	99.91
2591	99.91
2590	99.91
2589	99.91
2588	99.91
2587	99.91
2586	99.92
2585	99.93
2584	99.94
2583	99.95
2582	99.97
2581	99.97
2580	99.98
2579	99.97
2578	99.97
2577	99.96
2576	99.96
2575	99.97
2574	99.98
2573	99.99
2572	99.99
2571	99.99
2570	99.99
2569	100
2568	100
2567	100.01
2566	100.01
2565	100.01
2564	100.01
2563	100.01
2562	100.01
2561	100.02
2560	100.04
2559	100.05
2558	100.05
2557	100.06
2556	100.05
2555	100.04
2554	100.04
2553	100.04
2552	100.04
2551	100.05
2550	100.05
2549	100.06
2548	100.06
2547	100.07
2546	100.09
2545	100.1
2544	100.11
2543	100.11
2542	100.11
2541	100.11
2540	100.11
2539	100.11
2538	100.1
2537	100.1
2536	100.1
2535	100.1
2534	100.11
2533	100.12
2532	100.12
2531	100.12
2530	100.12
2529	100.13
2528	100.14
2527	100.15
2526	100.16
2525	100.15
2524	100.14
2523	100.12
2522	100.11
2521	100.11
2520	100.13
2519	100.15
2518	100.17
2517	100.18
2516	100.18
2515	100.18
2514	100.18
2513	100.17
2512	100.17
2511	100.17
2510	100.17
2509	100.17
2508	100.17
2507	100.17
2506	100.18
2505	100.2
2504	100.2
2503	100.2
2502	100.2
2501	100.2
2500	100.19
2499	100.18
2498	100.18
2497	100.17
2496	100.17
2495	100.18
2494	100.19
2493	100.2
2492	100.2
2491	100.21
2490	100.21
2489	100.22
2488	100.22
2487	100.23
2486	100.24
2485	100.26
2484	100.26
2483	100.27
2482	100.27
2481	100.26
2480	100.26
2479	100.26
2478	100.26
2477	100.26
2476	100.26
2475	100.27
2474	100.26
2473	100.26
2472	100.26
2471	100.26
2470	100.26
2469	100.26
2468	100.25
2467	100.25
2466	100.25
2465	100.25
2464	100.25
2463	100.25
2462	100.25
2461	100.24
2460	100.24
2459	100.24
2458	100.24
2457	100.24
2456	100.23
2455	100.21
2454	100.2
2453	100.19
2452	100.2
2451	100.21
2450	100.22
2449	100.23
2448	100.23
2447	100.23
2446	100.23
2445	100.22
2444	100.22
2443	100.22
2442	100.22
2441	100.23
2440	100.23
2439	100.24
2438	100.26
2437	100.27
2436	100.29
2435	100.29
2434	100.28
2433	100.28
2432	100.29
2431	100.3
2430	100.3
2429	100.31
2428	100.32
2427	100.32
2426	100.33
2425	100.34
2424	100.35
2423	100.34
2422	100.34
2421	100.33
2420	100.33
2419	100.32
2418	100.31
2417	100.32
2416	100.33
2415	100.33
2414	100.34
2413	100.34
2412	100.33
2411	100.32
2410	100.32
2409	100.33
2408	100.35
2407	100.37
2406	100.38
2405	100.38
2404	100.38
2403	100.38
2402	100.39
2401	100.39
2400	100.4
2399	100.4
2398	100.41
2397	100.4
2396	100.4
2395	100.39
2394	100.39
2393	100.39
2392	100.38
2391	100.38
2390	100.38
2389	100.39
2388	100.39
2387	100.39
2386	100.39
2385	100.39
2384	100.39
2383	100.39
2382	100.39
2381	100.38
2380	100.36
2379	100.33
2378	100.32
2377	100.32
2376	100.33
2375	100.35
2374	100.36
2373	100.37
2372	100.38
2371	100.4
2370	100.41
2369	100.42
2368	100.42
2367	100.42
2366	100.41
2365	100.4
2364	100.4
2363	100.39
2362	100.36
2361	100.35
2360	100.35
2359	100.36
2358	100.38
2357	100.4
2356	100.45
2355	100.52
2354	100.6
2353	100.69
2352	100.68
2351	100.51
2350	100.26
2349	100.16
2348	100.27
2347	100.48
2346	100.63
2345	100.56
2344	100.27
2343	99.98
2342	99.91
2341	100.02
2340	100.11
2339	100.17
2338	100.24
2337	100.3
2336	100.32
2335	100.3
2334	100.31
2333	100.38
2332	100.47
2331	100.53
2330	100.52
2329	100.46
2328	100.34
2327	100.18
2326	100.03
2325	99.94
2324	99.94
2323	100
2322	100.09
2321	100.18
2320	100.24
2319	100.28
2318	100.31
2317	100.34
2316	100.36
2315	100.41
2314	100.44
2313	100.44
2312	100.4
2311	100.36
2310	100.33
2309	100.32
2308	100.31
2307	100.3
2306	100.28
2305	100.26
2304	100.23
2303	100.21
2302	100.2
2301	100.18
2300	100.15
2299	100.1
2298	100.06
2297	100.03
2296	100
2295	99.97
2294	99.95
2293	99.93
2292	99.89
2291	99.85
2290	99.81
2289	99.78
2288	99.77
2287	99.75
2286	99.75
2285	99.75
2284	99.76
2283	99.78
2282	99.8
2281	99.83
2280	99.85
2279	99.87
2278	99.88
2277	99.89
2276	99.9
2275	99.92
2274	99.96
2273	100
2272	100.02
2271	100.02
2270	100.01
2269	100
2268	100
2267	100.01
2266	100.02
2265	100.03
2264	100.03
2263	100.02
2262	100.02
2261	100.02
2260	100.01
2259	100.01
2258	100.01
2257	100.02
2256	100.04
2255	100.06
2254	100.07
2253	100.07
2252	100.08
2251	100.09
2250	100.11
2249	100.12
2248	100.11
2247	100.09
2246	100.07
2245	100.06
2244	100.06
2243	100.06
2242	100.08
2241	100.1
2240	100.1
2239	100.1
2238	100.09
2237	100.08
2236	100.07
2235	100.06
2234	100.05
2233	100.05
2232	100.04
2231	100.05
2230	100.05
2229	100.05
2228	100.06
2227	100.08
2226	100.11
2225	100.13
2224	100.11
2223	100.06
2222	100.01
2221	99.98
2220	99.97
2219	99.99
2218	100.02
2217	100.06
2216	100.1
2215	100.12
2214	100.11
2213	100.09
2212	100.06
2211	100.03
2210	100.01
2209	100
2208	99.98
2207	99.97
2206	99.97
2205	99.98
2204	99.99
2203	100.02
2202	100.07
2201	100.13
2200	100.16
2199	100.15
2198	100.11
2197	100.07
2196	100.01
2195	99.95
2194	99.89
2193	99.85
2192	99.83
2191	99.84
2190	99.87
2189	99.87
2188	99.85
2187	99.83
2186	99.82
2185	99.84
2184	99.87
2183	99.94
2182	100.02
2181	100.06
2180	100.04
2179	99.99
2178	99.99
2177	100.03
2176	100.1
2175	100.16
2174	100.16
2173	100.1
2172	99.99
2171	99.87
2170	99.77
2169	99.69
2168	99.64
2167	99.61
2166	99.6
2165	99.56
2164	99.47
2163	99.38
2162	99.38
2161	99.59
2160	100.03
2159	100.62
2158	101.14
2157	101.42
2156	101.42
2155	101.25
2154	101.06
2153	100.88
2152	100.75
2151	100.67
2150	100.66
2149	100.68
2148	100.68
2147	100.67
2146	100.68
2145	100.69
2144	100.7
2143	100.68
2142	100.67
2141	100.65
2140	100.63
2139	100.64
2138	100.7
2137	100.81
2136	100.9
2135	100.96
2134	100.97
2133	100.95
2132	100.9
2131	100.85
2130	100.81
2129	100.77
2128	100.73
2127	100.67
2126	100.63
2125	100.6
2124	100.56
2123	100.51
2122	100.46
2121	100.42
2120	100.37
2119	100.34
2118	100.3
2117	100.27
2116	100.25
2115	100.23
2114	100.22
2113	100.21
2112	100.21
2111	100.19
2110	100.18
2109	100.16
2108	100.15
2107	100.15
2106	100.16
2105	100.17
2104	100.16
2103	100.15
2102	100.14
2101	100.15
2100	100.16
2099	100.17
2098	100.19
2097	100.25
2096	100.32
2095	100.39
2094	100.43
2093	100.42
2092	100.38
2091	100.32
2090	100.29
2089	100.28
2088	100.27
2087	100.24
2086	100.21
2085	100.17
2084	100.13
2083	100.1
2082	100.09
2081	100.1
2080	100.1
2079	100.09
2078	100.1
2077	100.1
2076	100.1
2075	100.1
2074	100.09
2073	100.08
2072	100.06
2071	100.04
2070	100.06
2069	100.09
2068	100.12
2067	100.12
2066	100.13
2065	100.13
2064	100.12
2063	100.11
2062	100.12
2061	100.14
2060	100.14
2059	100.1
2058	100.04
2057	100.01
2056	99.99
2055	99.96
2054	99.9
2053	99.78
2052	99.64
2051	99.56
2050	99.62
2049	99.77
2048	99.93
2047	100.01
2046	100.05
2045	100.06
2044	100.03
2043	99.98
2042	99.96
2041	99.96
2040	99.96
2039	99.93
2038	99.88
2037	99.83
2036	99.82
2035	99.84
2034	99.93
2033	100.04
2032	100.12
2031	100.18
2030	100.23
2029	100.25
2028	100.23
2027	100.18
2026	100.18
2025	100.21
2024	100.23
2023	100.21
2022	100.19
2021	100.16
2020	100.13
2019	100.11
2018	100.15
2017	100.25
2016	100.33
2015	100.38
2014	100.4
2013	100.4
2012	100.36
2011	100.28
2010	100.23
2009	100.26
2008	100.38
2007	100.54
2006	100.69
2005	100.74
2004	100.71
2003	100.63
[truncated: 1,603 more rows]

## Sheet: Rayon
Created as New Dataset	Sample 017 By Administrator Date Monday	June 27 2022
cm-1	%T
4000	100.88
3999	100.88
3998	100.87
3997	100.86
3996	100.85
3995	100.83
3994	100.81
3993	100.81
3992	100.82
3991	100.85
3990	100.87
3989	100.87
3988	100.88
3987	100.88
3986	100.87
3985	100.87
3984	100.86
3983	100.86
3982	100.85
3981	100.84
3980	100.81
3979	100.79
3978	100.77
3977	100.76
3976	100.75
3975	100.76
3974	100.75
3973	100.75
3972	100.76
3971	100.78
3970	100.81
3969	100.83
3968	100.84
3967	100.82
3966	100.78
3965	100.75
3964	100.73
3963	100.73
3962	100.74
3961	100.74
3960	100.74
3959	100.76
3958	100.77
3957	100.77
3956	100.75
3955	100.7
3954	100.62
3953	100.52
3952	100.42
3951	100.36
3950	100.36
3949	100.39
3948	100.41
3947	100.38
3946	100.38
3945	100.43
3944	100.51
3943	100.56
3942	100.55
3941	100.55
3940	100.62
3939	100.71
3938	100.72
3937	100.61
3936	100.46
3935	100.34
3934	100.31
3933	100.33
3932	100.37
3931	100.38
3930	100.36
3929	100.3
3928	100.25
3927	100.26
3926	100.28
3925	100.25
3924	100.16
3923	100.09
3922	100.1
3921	100.14
3920	100.19
3919	100.29
3918	100.44
3917	100.58
3916	100.64
3915	100.67
3914	100.75
3913	100.85
3912	100.89
3911	100.81
3910	100.6
3909	100.29
3908	99.94
3907	99.6
3906	99.35
3905	99.19
3904	99.1
3903	99.11
3902	99.32
3901	99.73
3900	100.1
3899	100.24
3898	100.2
3897	100.14
3896	100.09
3895	100.03
3894	100.03
3893	100.16
3892	100.3
3891	100.15
3890	99.79
3889	99.66
3888	99.87
3887	100.16
3886	100.18
3885	99.8
3884	99.39
3883	99.39
3882	99.77
3881	100.15
3880	100.18
3879	99.94
3878	99.81
3877	99.92
3876	99.99
3875	99.78
3874	99.3
3873	98.92
3872	98.99
3871	99.39
3870	99.56
3869	99.26
3868	99.02
3867	99.21
3866	99.55
3865	99.72
3864	99.74
3863	99.75
3862	99.83
3861	99.89
3860	99.82
3859	99.56
3858	99.14
3857	98.65
3856	98.27
3855	98.33
3854	98.86
3853	98.94
3852	98.35
3851	98.29
3850	98.97
3849	99.68
3848	100.07
3847	100.17
3846	100.08
3845	99.86
3844	99.53
3843	99.07
3842	98.66
3841	98.47
3840	98.55
3839	98.76
3838	98.86
3837	98.8
3836	98.78
3835	98.99
3834	99.42
3833	99.84
3832	100.05
3831	100.02
3830	99.93
3829	99.96
3828	100.05
3827	99.96
3826	99.58
3825	99.11
3824	98.88
3823	98.98
3822	99.21
3821	99.1
3820	98.61
3819	98.52
3818	99.13
3817	99.87
3816	100.14
3815	99.9
3814	99.76
3813	99.99
3812	100.23
3811	100.2
3810	100.06
3809	100.05
3808	100.12
3807	99.88
3806	99.25
3805	98.77
3804	98.84
3803	99.25
3802	99.52
3801	99.25
3800	98.78
3799	98.87
3798	99.48
3797	100.07
3796	100.33
3795	100.39
3794	100.51
3793	100.71
3792	100.85
3791	100.85
3790	100.76
3789	100.62
3788	100.49
3787	100.41
3786	100.39
3785	100.33
3784	100.18
3783	100.04
3782	100.04
3781	100.18
3780	100.34
3779	100.38
3778	100.35
3777	100.42
3776	100.55
3775	100.56
3774	100.37
3773	100.17
3772	100.11
3771	100.13
3770	100.07
3769	99.9
3768	99.87
3767	100.08
3766	100.3
3765	100.28
3764	100.07
3763	99.92
3762	99.89
3761	99.85
3760	99.77
3759	99.67
3758	99.51
3757	99.29
3756	99.05
3755	98.78
3754	98.43
3753	98.07
3752	98.01
3751	98.23
3750	98.2
3749	97.86
3748	97.74
3747	98.2
3746	99.04
3745	99.72
3744	99.53
3743	98.78
3742	98.56
3741	98.82
3740	98.91
3739	98.67
3738	98.34
3737	98.19
3736	98.26
3735	98.49
3734	98.86
3733	99.32
3732	99.63
3731	99.69
3730	99.73
3729	99.87
3728	100.01
3727	100
3726	99.87
3725	99.77
3724	99.82
3723	99.94
3722	100.03
3721	100.08
3720	100.17
3719	100.27
3718	100.25
3717	100.05
3716	99.75
3715	99.45
3714	99.21
3713	99.12
3712	99.24
3711	99.42
3710	99.56
3709	99.77
3708	100.05
3707	100.27
3706	100.36
3705	100.37
3704	100.39
3703	100.47
3702	100.54
3701	100.51
3700	100.44
3699	100.51
3698	100.65
3697	100.67
3696	100.48
3695	100.16
3694	99.78
3693	99.35
3692	98.97
3691	98.88
3690	99.17
3689	99.49
3688	99.53
3687	99.53
3686	99.82
3685	100.25
3684	100.52
3683	100.51
3682	100.31
3681	99.96
3680	99.41
3679	98.76
3678	98.37
3677	98.5
3676	98.88
3675	98.73
3674	98.25
3673	98.34
3672	98.94
3671	99.54
3670	99.85
3669	99.8
3668	99.8
3667	100.15
3666	100.61
3665	100.89
3664	100.98
3663	100.96
3662	100.83
3661	100.59
3660	100.33
3659	100.2
3658	100.28
3657	100.4
3656	100.23
3655	99.75
3654	99.28
3653	98.87
3652	98.39
3651	97.98
3650	98.04
3649	98.44
3648	98.74
3647	98.96
3646	99.32
3645	99.83
3644	100.31
3643	100.62
3642	100.73
3641	100.73
3640	100.7
3639	100.66
3638	100.56
3637	100.44
3636	100.37
3635	100.26
3634	99.97
3633	99.54
3632	99.19
3631	99.17
3630	99.57
3629	100.02
3628	99.96
3627	99.78
3626	99.98
3625	100.29
3624	100.31
3623	100.08
3622	99.8
3621	99.64
3620	99.62
3619	99.56
3618	99.37
3617	99.23
3616	99.3
3615	99.48
3614	99.62
3613	99.66
3612	99.67
3611	99.79
3610	100.05
3609	100.31
3608	100.45
3607	100.44
3606	100.41
3605	100.44
3604	100.44
3603	100.39
3602	100.3
3601	100.19
3600	100.07
3599	99.97
3598	99.94
3597	99.97
3596	100.06
3595	100.16
3594	100.19
3593	100.12
3592	100
3591	99.86
3590	99.74
3589	99.73
3588	99.87
3587	99.98
3586	100.03
3585	100.15
3584	100.36
3583	100.54
3582	100.62
3581	100.64
3580	100.64
3579	100.62
3578	100.6
3577	100.6
3576	100.61
3575	100.63
3574	100.6
3573	100.47
3572	100.22
3571	99.87
3570	99.49
3569	99.24
3568	99.24
3567	99.39
3566	99.51
3565	99.64
3564	99.86
3563	100.12
3562	100.32
3561	100.46
3560	100.56
3559	100.62
3558	100.64
3557	100.6
3556	100.52
3555	100.43
3554	100.38
3553	100.36
3552	100.31
3551	100.22
3550	100.13
3549	100.06
3548	100.03
3547	100.03
3546	100.1
3545	100.2
3544	100.33
3543	100.46
3542	100.56
3541	100.62
3540	100.62
3539	100.59
3538	100.57
3537	100.58
3536	100.59
3535	100.6
3534	100.59
3533	100.54
3532	100.46
3531	100.36
3530	100.25
3529	100.17
3528	100.11
3527	100.06
3526	100.06
3525	100.12
3524	100.23
3523	100.33
3522	100.4
3521	100.45
3520	100.52
3519	100.58
3518	100.6
3517	100.59
3516	100.58
3515	100.55
3514	100.5
3513	100.43
3512	100.38
3511	100.38
3510	100.39
3509	100.39
3508	100.34
3507	100.27
3506	100.2
3505	100.14
3504	100.12
3503	100.14
3502	100.2
3501	100.27
3500	100.34
3499	100.38
3498	100.39
3497	100.4
3496	100.4
3495	100.41
3494	100.43
3493	100.44
3492	100.44
3491	100.42
3490	100.39
3489	100.36
3488	100.34
3487	100.32
3486	100.29
3485	100.26
3484	100.24
3483	100.23
3482	100.23
3481	100.24
3480	100.28
3479	100.33
3478	100.37
3477	100.4
3476	100.4
3475	100.4
3474	100.39
3473	100.37
3472	100.36
3471	100.34
3470	100.31
3469	100.3
3468	100.29
3467	100.29
3466	100.29
3465	100.28
3464	100.28
3463	100.28
3462	100.28
3461	100.28
3460	100.31
3459	100.35
3458	100.38
3457	100.39
3456	100.39
3455	100.38
3454	100.37
3453	100.34
3452	100.3
3451	100.22
3450	100.14
3449	100.08
3448	100.05
3447	100.04
3446	100.04
3445	100.07
3444	100.13
3443	100.19
3442	100.21
3441	100.21
3440	100.2
3439	100.2
3438	100.19
3437	100.18
3436	100.17
3435	100.16
3434	100.17
3433	100.17
3432	100.17
3431	100.17
3430	100.18
3429	100.2
3428	100.22
3427	100.23
3426	100.22
3425	100.2
3424	100.16
3423	100.13
3422	100.11
3421	100.11
3420	100.13
3419	100.17
3418	100.21
3417	100.23
3416	100.24
3415	100.23
3414	100.21
3413	100.2
3412	100.2
3411	100.19
3410	100.19
3409	100.2
3408	100.2
3407	100.21
3406	100.2
3405	100.18
3404	100.15
3403	100.12
3402	100.1
3401	100.09
3400	100.09
3399	100.1
3398	100.11
3397	100.09
3396	100.07
3395	100.05
3394	100.05
3393	100.06
3392	100.08
3391	100.11
3390	100.15
3389	100.17
3388	100.18
3387	100.17
3386	100.17
3385	100.17
3384	100.18
3383	100.18
3382	100.18
3381	100.18
3380	100.18
3379	100.18
3378	100.17
3377	100.17
3376	100.17
3375	100.17
3374	100.17
3373	100.14
3372	100.11
3371	100.09
3370	100.06
3369	100.05
3368	100.05
3367	100.06
3366	100.07
3365	100.08
3364	100.09
3363	100.1
3362	100.11
3361	100.12
3360	100.14
3359	100.15
3358	100.17
3357	100.18
3356	100.19
3355	100.19
3354	100.18
3353	100.16
3352	100.15
3351	100.16
3350	100.18
3349	100.2
3348	100.22
3347	100.22
3346	100.21
3345	100.19
3344	100.18
3343	100.17
3342	100.17
3341	100.15
3340	100.14
3339	100.12
3338	100.13
3337	100.15
3336	100.17
3335	100.19
3334	100.22
3333	100.23
3332	100.24
3331	100.24
3330	100.22
3329	100.2
3328	100.17
3327	100.16
3326	100.16
3325	100.17
3324	100.2
3323	100.23
3322	100.25
3321	100.27
3320	100.28
3319	100.28
3318	100.28
3317	100.26
3316	100.25
3315	100.23
3314	100.21
3313	100.19
3312	100.16
3311	100.13
3310	100.11
3309	100.11
3308	100.11
3307	100.12
3306	100.15
3305	100.18
3304	100.22
3303	100.24
3302	100.25
3301	100.25
3300	100.24
3299	100.22
3298	100.21
3297	100.19
3296	100.18
3295	100.18
3294	100.17
3293	100.18
3292	100.19
3291	100.21
3290	100.25
3289	100.28
3288	100.3
3287	100.31
3286	100.32
3285	100.33
3284	100.33
3283	100.32
3282	100.32
3281	100.31
3280	100.3
3279	100.28
3278	100.26
3277	100.23
3276	100.2
3275	100.19
3274	100.19
3273	100.19
3272	100.21
3271	100.23
3270	100.26
3269	100.29
3268	100.31
3267	100.33
3266	100.33
3265	100.33
3264	100.33
3263	100.33
3262	100.32
3261	100.32
3260	100.31
3259	100.3
3258	100.28
3257	100.27
3256	100.26
3255	100.28
3254	100.3
3253	100.32
3252	100.33
3251	100.33
3250	100.32
3249	100.28
3248	100.25
3247	100.23
3246	100.24
3245	100.26
3244	100.28
3243	100.31
3242	100.33
3241	100.34
3240	100.34
3239	100.33
3238	100.31
3237	100.29
3236	100.27
3235	100.25
3234	100.25
3233	100.26
3232	100.29
3231	100.31
3230	100.33
3229	100.35
3228	100.36
3227	100.37
3226	100.38
3225	100.39
3224	100.39
3223	100.38
3222	100.36
3221	100.35
3220	100.34
3219	100.35
3218	100.35
3217	100.34
3216	100.35
3215	100.35
3214	100.36
3213	100.37
3212	100.39
3211	100.4
3210	100.42
3209	100.42
3208	100.42
3207	100.42
3206	100.43
3205	100.44
3204	100.44
3203	100.45
3202	100.44
3201	100.44
3200	100.44
3199	100.43
3198	100.44
3197	100.44
3196	100.45
3195	100.46
3194	100.47
3193	100.48
3192	100.48
3191	100.49
3190	100.49
3189	100.49
3188	100.49
3187	100.49
3186	100.49
3185	100.48
3184	100.49
3183	100.49
3182	100.49
3181	100.5
3180	100.5
3179	100.5
3178	100.51
3177	100.52
3176	100.53
3175	100.55
3174	100.55
3173	100.55
3172	100.55
3171	100.54
3170	100.54
3169	100.55
3168	100.55
3167	100.56
3166	100.56
3165	100.56
3164	100.57
3163	100.57
3162	100.57
3161	100.57
3160	100.57
3159	100.56
3158	100.55
3157	100.54
3156	100.52
3155	100.49
3154	100.47
3153	100.47
3152	100.49
3151	100.52
3150	100.55
3149	100.58
3148	100.6
3147	100.61
3146	100.61
3145	100.61
3144	100.6
3143	100.59
3142	100.57
3141	100.55
3140	100.54
3139	100.55
3138	100.57
3137	100.58
3136	100.59
3135	100.59
3134	100.59
3133	100.59
3132	100.59
3131	100.58
3130	100.58
3129	100.59
3128	100.6
3127	100.61
3126	100.6
3125	100.58
3124	100.57
3123	100.55
3122	100.53
3121	100.52
3120	100.51
3119	100.51
3118	100.52
3117	100.53
3116	100.55
3115	100.58
3114	100.61
3113	100.64
3112	100.65
3111	100.65
3110	100.65
3109	100.66
3108	100.69
3107	100.72
3106	100.74
3105	100.74
3104	100.73
3103	100.71
3102	100.69
3101	100.68
3100	100.69
3099	100.71
3098	100.74
3097	100.78
3096	100.8
3095	100.81
3094	100.82
3093	100.81
3092	100.8
3091	100.79
3090	100.79
3089	100.8
3088	100.8
3087	100.81
3086	100.81
3085	100.8
3084	100.79
3083	100.77
3082	100.76
3081	100.76
3080	100.76
3079	100.78
3078	100.81
3077	100.85
3076	100.89
3075	100.92
3074	100.93
3073	100.94
3072	100.93
3071	100.92
3070	100.89
3069	100.87
3068	100.85
3067	100.85
3066	100.86
3065	100.89
3064	100.92
3063	100.95
3062	100.98
3061	100.99
3060	100.98
3059	100.96
3058	100.94
3057	100.93
3056	100.94
3055	100.95
3054	100.96
3053	100.96
3052	100.96
3051	100.96
3050	100.96
3049	100.97
3048	100.97
3047	100.97
3046	100.96
3045	100.96
3044	100.96
3043	100.96
3042	100.97
3041	100.99
3040	101
3039	101
3038	100.99
3037	100.97
3036	100.94
3035	100.92
3034	100.91
3033	100.91
3032	100.93
3031	100.96
3030	100.98
3029	101
3028	101
3027	100.99
3026	100.98
3025	100.98
3024	100.98
3023	100.99
3022	100.99
3021	100.99
3020	100.98
3019	100.97
3018	100.98
3017	100.97
3016	100.97
3015	100.95
3014	100.94
3013	100.94
3012	100.96
3011	100.98
3010	101
3009	101.02
3008	101.04
3007	101.04
3006	101.03
3005	101.03
3004	101.02
3003	101.02
3002	101.03
3001	101.03
3000	101.02
2999	101
2998	100.99
2997	100.99
2996	100.98
2995	100.98
2994	100.98
2993	100.98
2992	100.99
2991	101.01
2990	101.02
2989	101.03
2988	101.03
2987	101.02
2986	101.02
2985	101.01
2984	101.01
2983	101.01
2982	101
2981	100.99
2980	100.99
2979	100.99
2978	101
2977	100.99
2976	100.99
2975	100.99
2974	101
2973	101.02
2972	101.03
2971	101.03
2970	101.03
2969	101.02
2968	101.02
2967	101.01
2966	101.01
2965	101
2964	101
2963	100.99
2962	101
2961	101
2960	101
2959	101
2958	101
2957	100.98
2956	100.97
2955	100.95
2954	100.94
2953	100.93
2952	100.93
2951	100.93
2950	100.92
2949	100.91
2948	100.89
2947	100.86
2946	100.84
2945	100.82
2944	100.82
2943	100.83
2942	100.85
2941	100.85
2940	100.85
2939	100.84
2938	100.82
2937	100.8
2936	100.79
2935	100.78
2934	100.77
2933	100.75
2932	100.72
2931	100.7
2930	100.7
2929	100.71
2928	100.73
2927	100.74
2926	100.76
2925	100.77
2924	100.79
2923	100.81
2922	100.82
2921	100.82
2920	100.82
2919	100.82
2918	100.82
2917	100.81
2916	100.79
2915	100.76
2914	100.73
2913	100.71
2912	100.69
2911	100.67
2910	100.66
2909	100.65
2908	100.64
2907	100.63
2906	100.61
2905	100.6
2904	100.6
2903	100.59
2902	100.59
2901	100.58
2900	100.57
2899	100.56
2898	100.55
2897	100.54
2896	100.54
2895	100.54
2894	100.55
2893	100.55
2892	100.55
2891	100.55
2890	100.54
2889	100.54
2888	100.54
2887	100.54
2886	100.54
2885	100.54
2884	100.54
2883	100.54
2882	100.54
2881	100.55
2880	100.55
2879	100.55
2878	100.55
2877	100.54
2876	100.52
2875	100.51
2874	100.5
2873	100.5
2872	100.51
2871	100.52
2870	100.52
2869	100.52
2868	100.52
2867	100.52
2866	100.53
2865	100.54
2864	100.55
2863	100.56
2862	100.57
2861	100.59
2860	100.61
2859	100.63
2858	100.66
2857	100.68
2856	100.69
2855	100.71
2854	100.72
2853	100.74
2852	100.76
2851	100.77
2850	100.79
2849	100.8
2848	100.81
2847	100.81
2846	100.8
2845	100.79
2844	100.77
2843	100.75
2842	100.74
2841	100.72
2840	100.71
2839	100.71
2838	100.71
2837	100.72
2836	100.73
2835	100.74
2834	100.74
2833	100.75
2832	100.75
2831	100.76
2830	100.76
2829	100.77
2828	100.77
2827	100.77
2826	100.77
2825	100.77
2824	100.78
2823	100.78
2822	100.79
2821	100.79
2820	100.79
2819	100.79
2818	100.78
2817	100.78
2816	100.78
2815	100.78
2814	100.77
2813	100.77
2812	100.76
2811	100.75
2810	100.75
2809	100.76
2808	100.77
2807	100.78
2806	100.79
2805	100.79
2804	100.79
2803	100.79
2802	100.78
2801	100.78
2800	100.77
2799	100.77
2798	100.76
2797	100.77
2796	100.77
2795	100.77
2794	100.77
2793	100.77
2792	100.77
2791	100.77
2790	100.78
2789	100.78
2788	100.79
2787	100.8
2786	100.81
2785	100.81
2784	100.8
2783	100.8
2782	100.8
2781	100.8
2780	100.81
2779	100.81
2778	100.8
2777	100.79
2776	100.78
2775	100.79
2774	100.79
2773	100.8
2772	100.81
2771	100.81
2770	100.81
2769	100.81
2768	100.81
2767	100.82
2766	100.83
2765	100.83
2764	100.83
2763	100.83
2762	100.82
2761	100.82
2760	100.82
2759	100.82
2758	100.82
2757	100.82
2756	100.82
2755	100.82
2754	100.81
2753	100.81
2752	100.8
2751	100.8
2750	100.8
2749	100.79
2748	100.79
2747	100.8
2746	100.8
2745	100.81
2744	100.82
2743	100.82
2742	100.81
2741	100.81
2740	100.8
2739	100.8
2738	100.8
2737	100.8
2736	100.8
2735	100.8
2734	100.8
2733	100.8
2732	100.8
2731	100.8
2730	100.8
2729	100.8
2728	100.8
2727	100.79
2726	100.79
2725	100.79
2724	100.8
2723	100.81
2722	100.81
2721	100.82
2720	100.82
2719	100.81
2718	100.8
2717	100.8
2716	100.8
2715	100.81
2714	100.81
2713	100.81
2712	100.81
2711	100.81
2710	100.8
2709	100.8
2708	100.8
2707	100.81
2706	100.81
2705	100.82
2704	100.83
2703	100.83
2702	100.82
2701	100.82
2700	100.82
2699	100.82
2698	100.82
2697	100.82
2696	100.82
2695	100.82
2694	100.82
2693	100.82
2692	100.83
2691	100.83
2690	100.83
2689	100.82
2688	100.82
2687	100.82
2686	100.82
2685	100.82
2684	100.82
2683	100.82
2682	100.82
2681	100.82
2680	100.82
2679	100.82
2678	100.82
2677	100.81
2676	100.81
2675	100.8
2674	100.8
2673	100.8
2672	100.8
2671	100.8
2670	100.8
2669	100.8
2668	100.8
2667	100.79
2666	100.79
2665	100.77
2664	100.76
2663	100.74
2662	100.72
2661	100.71
2660	100.69
2659	100.67
2658	100.66
2657	100.65
2656	100.64
2655	100.63
2654	100.63
2653	100.63
2652	100.63
2651	100.64
2650	100.64
2649	100.64
2648	100.64
2647	100.64
2646	100.64
2645	100.64
2644	100.64
2643	100.65
2642	100.65
2641	100.65
2640	100.65
2639	100.65
2638	100.65
2637	100.65
2636	100.66
2635	100.67
2634	100.67
2633	100.68
2632	100.68
2631	100.68
2630	100.68
2629	100.69
2628	100.69
2627	100.7
2626	100.7
2625	100.71
2624	100.72
2623	100.73
2622	100.74
2621	100.74
2620	100.75
2619	100.75
2618	100.76
2617	100.76
2616	100.76
2615	100.75
2614	100.76
2613	100.76
2612	100.77
2611	100.78
2610	100.78
2609	100.78
2608	100.78
2607	100.78
2606	100.78
2605	100.78
2604	100.79
2603	100.8
2602	100.81
2601	100.82
2600	100.82
2599	100.82
2598	100.82
2597	100.82
2596	100.82
2595	100.82
2594	100.82
2593	100.83
2592	100.83
2591	100.83
2590	100.83
2589	100.83
2588	100.83
2587	100.83
2586	100.84
2585	100.85
2584	100.86
2583	100.86
2582	100.86
2581	100.86
2580	100.86
2579	100.86
2578	100.86
2577	100.85
2576	100.85
2575	100.85
2574	100.85
2573	100.86
2572	100.86
2571	100.87
2570	100.88
2569	100.89
2568	100.9
2567	100.91
2566	100.91
2565	100.91
2564	100.9
2563	100.89
2562	100.88
2561	100.88
2560	100.88
2559	100.89
2558	100.89
2557	100.9
2556	100.9
2555	100.9
2554	100.9
2553	100.89
2552	100.89
2551	100.89
2550	100.89
2549	100.9
2548	100.9
2547	100.91
2546	100.91
2545	100.91
2544	100.92
2543	100.92
2542	100.93
2541	100.94
2540	100.94
2539	100.94
2538	100.94
2537	100.94
2536	100.95
2535	100.96
2534	100.96
2533	100.96
2532	100.96
2531	100.95
2530	100.95
2529	100.95
2528	100.95
2527	100.96
2526	100.96
2525	100.95
2524	100.94
2523	100.93
2522	100.93
2521	100.94
2520	100.94
2519	100.96
2518	100.97
2517	100.98
2516	100.99
2515	100.99
2514	100.99
2513	100.99
2512	100.99
2511	100.98
2510	100.97
2509	100.96
2508	100.96
2507	100.96
2506	100.97
2505	100.98
2504	100.97
2503	100.96
2502	100.96
2501	100.97
2500	100.98
2499	100.98
2498	100.98
2497	100.97
2496	100.97
2495	100.97
2494	100.97
2493	100.97
2492	100.97
2491	100.96
2490	100.96
2489	100.96
2488	100.97
2487	100.98
2486	100.99
2485	101
2484	101.01
2483	101.02
2482	101.01
2481	101
2480	100.99
2479	100.99
2478	100.99
2477	101
2476	101
2475	101
2474	100.99
2473	100.99
2472	100.99
2471	100.98
2470	100.97
2469	100.97
2468	100.97
2467	100.98
2466	100.99
2465	100.99
2464	100.99
2463	100.98
2462	100.97
2461	100.97
2460	100.96
2459	100.96
2458	100.95
2457	100.93
2456	100.92
2455	100.9
2454	100.89
2453	100.89
2452	100.9
2451	100.91
2450	100.92
2449	100.93
2448	100.93
2447	100.92
2446	100.91
2445	100.91
2444	100.91
2443	100.91
2442	100.92
2441	100.92
2440	100.93
2439	100.94
2438	100.95
2437	100.96
2436	100.96
2435	100.96
2434	100.95
2433	100.94
2432	100.95
2431	100.96
2430	100.98
2429	100.99
2428	101.01
2427	101.01
2426	101.02
2425	101.02
2424	101.02
2423	101.02
2422	101.01
2421	101.01
2420	101.01
2419	101.01
2418	101.01
2417	101.01
2416	101.01
2415	101.01
2414	101.01
2413	101.01
2412	101
2411	101
2410	100.99
2409	100.99
2408	101.01
2407	101.03
2406	101.04
2405	101.04
2404	101.05
2403	101.05
2402	101.05
2401	101.05
2400	101.05
2399	101.05
2398	101.05
2397	101.05
2396	101.05
2395	101.05
2394	101.04
2393	101.04
2392	101.04
2391	101.04
2390	101.04
2389	101.05
2388	101.06
2387	101.06
2386	101.06
2385	101.05
2384	101.05
2383	101.05
2382	101.05
2381	101.05
2380	101.04
2379	101.03
2378	101.02
2377	101.03
2376	101.05
2375	101.06
2374	101.05
2373	101.05
2372	101.06
2371	101.07
2370	101.07
2369	101.06
2368	101.06
2367	101.05
2366	101.03
2365	101.03
2364	101.05
2363	101.05
2362	101.03
2361	101.02
2360	101.02
2359	101.03
2358	101.04
2357	101.04
2356	101.08
2355	101.13
2354	101.19
2353	101.25
2352	101.24
2351	101.08
2350	100.84
2349	100.73
2348	100.82
2347	101.05
2346	101.26
2345	101.28
2344	101.08
2343	100.81
2342	100.7
2341	100.74
2340	100.79
2339	100.82
2338	100.85
2337	100.89
2336	100.89
2335	100.87
2334	100.88
2333	100.94
2332	101.02
2331	101.08
2330	101.07
2329	101
2328	100.87
2327	100.69
2326	100.53
2325	100.41
2324	100.4
2323	100.47
2322	100.57
2321	100.66
2320	100.72
2319	100.76
2318	100.78
2317	100.79
2316	100.82
2315	100.87
2314	100.93
2313	100.96
2312	100.94
2311	100.91
2310	100.87
2309	100.84
2308	100.82
2307	100.8
2306	100.78
2305	100.77
2304	100.76
2303	100.76
2302	100.76
2301	100.75
2300	100.72
2299	100.68
2298	100.65
2297	100.62
2296	100.59
2295	100.56
2294	100.55
2293	100.53
2292	100.51
2291	100.48
2290	100.45
2289	100.41
2288	100.38
2287	100.35
2286	100.35
2285	100.35
2284	100.37
2283	100.38
2282	100.41
2281	100.44
2280	100.46
2279	100.49
2278	100.51
2277	100.53
2276	100.54
2275	100.57
2274	100.61
2273	100.65
2272	100.67
2271	100.66
2270	100.63
2269	100.61
2268	100.61
2267	100.63
2266	100.65
2265	100.67
2264	100.66
2263	100.63
2262	100.61
2261	100.62
2260	100.62
2259	100.61
2258	100.6
2257	100.59
2256	100.6
2255	100.61
2254	100.62
2253	100.63
2252	100.64
2251	100.64
2250	100.63
2249	100.62
2248	100.62
2247	100.63
2246	100.64
2245	100.64
2244	100.63
2243	100.62
2242	100.61
2241	100.61
2240	100.62
2239	100.63
2238	100.63
2237	100.63
2236	100.62
2235	100.61
2234	100.6
2233	100.59
2232	100.58
2231	100.58
2230	100.59
2229	100.6
2228	100.61
2227	100.63
2226	100.65
2225	100.67
2224	100.67
2223	100.65
2222	100.62
2221	100.61
2220	100.62
2219	100.64
2218	100.65
2217	100.65
2216	100.65
2215	100.64
2214	100.63
2213	100.63
2212	100.63
2211	100.63
2210	100.62
2209	100.61
2208	100.59
2207	100.57
2206	100.58
2205	100.58
2204	100.58
2203	100.56
2202	100.57
2201	100.61
2200	100.65
2199	100.66
2198	100.63
2197	100.57
2196	100.51
2195	100.45
2194	100.4
2193	100.37
2192	100.36
2191	100.36
2190	100.36
2189	100.34
2188	100.31
2187	100.29
2186	100.29
2185	100.34
2184	100.4
2183	100.46
2182	100.52
2181	100.57
2180	100.57
2179	100.54
2178	100.52
2177	100.56
2176	100.63
2175	100.71
2174	100.74
2173	100.69
2172	100.57
2171	100.43
2170	100.32
2169	100.25
2168	100.2
2167	100.16
2166	100.12
2165	100.07
2164	99.96
2163	99.84
2162	99.82
2161	100.03
2160	100.47
2159	101.02
2158	101.49
2157	101.72
2156	101.73
2155	101.61
2154	101.48
2153	101.37
2152	101.3
2151	101.28
2150	101.3
2149	101.32
2148	101.3
2147	101.26
2146	101.24
2145	101.26
2144	101.26
2143	101.25
2142	101.23
2141	101.21
2140	101.2
2139	101.21
2138	101.26
2137	101.34
2136	101.42
2135	101.49
2134	101.51
2133	101.48
2132	101.41
2131	101.33
2130	101.26
2129	101.22
2128	101.17
2127	101.13
2126	101.09
2125	101.07
2124	101.05
2123	101.02
2122	100.98
2121	100.94
2120	100.89
2119	100.84
2118	100.78
2117	100.74
2116	100.7
2115	100.67
2114	100.66
2113	100.66
2112	100.66
2111	100.65
2110	100.66
2109	100.67
2108	100.68
2107	100.69
2106	100.69
2105	100.68
2104	100.67
2103	100.66
2102	100.67
2101	100.7
2100	100.72
2099	100.72
2098	100.73
2097	100.76
2096	100.82
2095	100.86
2094	100.86
2093	100.83
2092	100.78
2091	100.74
2090	100.72
2089	100.71
2088	100.68
2087	100.64
2086	100.61
2085	100.58
2084	100.57
2083	100.55
2082	100.55
2081	100.56
2080	100.56
2079	100.55
2078	100.54
2077	100.53
2076	100.51
2075	100.48
2074	100.47
2073	100.46
2072	100.46
2071	100.45
2070	100.44
2069	100.46
2068	100.47
2067	100.47
2066	100.48
2065	100.48
2064	100.47
2063	100.47
2062	100.48
2061	100.51
2060	100.52
2059	100.5
2058	100.47
2057	100.43
2056	100.41
2055	100.36
2054	100.27
2053	100.12
2052	99.93
2051	99.81
2050	99.83
2049	100
2048	100.19
2047	100.33
2046	100.39
2045	100.39
2044	100.34
2043	100.28
2042	100.23
2041	100.23
2040	100.24
2039	100.23
2038	100.2
2037	100.17
2036	100.16
2035	100.16
2034	100.21
2033	100.3
2032	100.36
2031	100.41
2030	100.46
2029	100.53
2028	100.58
2027	100.59
2026	100.6
2025	100.61
2024	100.59
2023	100.55
2022	100.52
2021	100.51
2020	100.5
2019	100.46
2018	100.43
2017	100.43
2016	100.46
2015	100.48
2014	100.52
2013	100.57
2012	100.58
2011	100.53
2010	100.48
2009	100.51
2008	100.62
2007	100.77
2006	100.9
2005	100.99
2004	100.99
2003	100.92
[truncated: 1,603 more rows]
